# Supplementary material for: Identification of Salt-Responsive Genes in Melatonin Regulated Alfalfa Salt Tolerance by Transcriptome Analysis
Source: Preprints.org preprint supplement (doi:10.20944/preprints202403.1815.v1), 2024-03-29
Supplement: Supplementary file 1 [file Table S2.xlsx]

## Sheet: go_class_table
Supplemental table S2. GO annotation information of differential genes through pairwise comparison of gene sets
Term type	Term	GO	WLNMT_vs_WLN num	WLNMT_vs_WLN percent	WLNMT_vs_WLN list	WLN_vs_WLCK_G num	WLN_vs_WLCK_G percent	WLN_vs_WLCK_G list	WLNMT_vs_WLCK_G num	WLNMT_vs_WLCK_G percent	WLNMT_vs_WLCK_G list
biological_process	cell killing	GO:0001906	0	0	none	1	0.000469263256687(1/2131)	MsG0880042262.01	1	0.000345303867403(1/2896)	MsG0280010228.01
biological_process	immune system process	GO:0002376	0	0	none	12	0.00563115908024(12/2131)	MsG0780038914.01;MsG0580029430.01;MsG0880045351.01;MsG0480022351.01;MsG0780040436.01;MsG0780036387.01;MsG0180003386.01;MsG0880045350.01;MsG0380016169.01;MsG0880045924.01;MsG0580029432.01;MsG0580029437.01	15	0.00517955801105(15/2896)	MsG0580029430.01;MsG0480023523.01;MsG0880045351.01;MsG0480022351.01;MsG0380015931.01;MsG0480023522.01;MsG0780040436.01;MsG0780041652.01;MsG0880045350.01;MsG0380016169.01;MsG0480021224.01;MsG0880045924.01;MsG0580029432.01;MsG0580029437.01;MsG0480023518.01
biological_process	biological regulation	GO:0065007	14	0.157303370787(14/89)	MsG0480018952.01;MsG0680033905.01;MsG0380013838.01;MsG0680035721.01;MsG0680034750.01;MsG0780036485.01;MsG0180005065.01;MsG0680035895.01;MsG0680030362.01;MsG0780040377.01;MsG0780041212.01;MsG0280008061.01;MsG0480019028.01;MsG0780037943.01	372	0.174565931488(372/2131)	MsG0180006012.01;MsG0880046263.01;MsG0280009642.01;MsG0580025117.01;MsG0580028560.01;MsG0580027687.01;MsG0580029901.01;MsG0480023317.01;MsG0680034959.01;MsG0480022820.01;MsG0780037118.01;MsG0880046429.01;MsG0480018539.01;MsG0280008226.01;MsG0780040436.01;MsG0380011872.01;MsG0780038083.01;MsG0580028434.01;MsG0480020961.01;MsG0280008093.01;MsG0180001660.01;MsG0280006421.01;MsG0280008436.01;MsG04800…	444	0.153314917127(444/2896)	MsG0480021143.01;MsG0180006012.01;MsG0380017380.01;MsG0280009642.01;MsG0180004060.01;MsG0580025117.01;MsG0580028560.01;MsG0280008601.01;MsG0380017667.01;MsG0880043906.01;MsG0580029901.01;MsG0680034959.01;MsG0780038153.01;MsG0480022820.01;MsG0480019294.01;MsG0880046263.01;MsG0280010868.01;MsG0480018539.01;MsG0480021996.01;MsG0280008226.01;MsG0580024875.01;MsG0480018537.01;MsG0780040436.01;MsG01800…
biological_process	metabolic process	GO:0008152	42	0.47191011236(42/89)	MsG0880047668.01;MsG0380014016.01;MsG0280008196.01;MsG0580028023.01;MsG0880042650.01;MsG0380016128.01;MsG0680034664.01;MsG0680035721.01;MsG0380013838.01;MsG0580024450.01;MsG0880044037.01;MsG0780038318.01;MsG0180005575.01;MsG0680034290.01;MsG0880047513.01;MsG0680030362.01;MsG0880047232.01;MsG0280006481.01;MsG0280008061.01;MsG0280008193.01;MsG0480020669.01;MsG0480022311.01;MsG0480021808.01;MsG07800…	977	0.458470201783(977/2131)	MsG0480023945.01;MsG0480019532.01;MsG0380017474.01;MsG0580027208.01;MsG0280008280.01;MsG0880046427.01;MsG0880047322.01;MsG0880043920.01;MsG0480022530.01;MsG0180001258.01;MsG0180003210.01;MsG0680030629.01;MsG0480021554.01;MsG0480021682.01;MsG0280009855.01;MsG0780038922.01;MsG0180005492.01;MsG0280010939.01;MsG0380014605.01;MsG0180004774.01;MsG0480019187.01;MsG0180004924.01;MsG0780036582.01;MsG08800…	1404	0.484806629834(1404/2896)	MsG0480022530.01;MsG0180003210.01;MsG0480021554.01;MsG0680035612.01;MsG0180004774.01;MsG0580025627.01;MsG0880046573.01;MsG0280008262.01;MsG0180005022.01;MsG0880047656.01;MsG0480020814.01;MsG0380013491.01;MsG0380016507.01;MsG0380011663.01;MsG0180004987.01;MsG0580024178.01;MsG0380014123.01;MsG0480023250.01;MsG0780040610.01;MsG0780038083.01;MsG0280009745.01;MsG0480021357.01;MsG0880047655.01;MsG07800…
biological_process	multi-organism process	GO:0051704	5	0.0561797752809(5/89)	MsG0380013593.01;MsG0780038015.01;MsG0180005059.01;MsG0580024450.01;MsG0680032657.01	92	0.0431722196152(92/2131)	MsG0380012938.01;MsG0880046106.01;MsG0580025265.01;MsG0680032727.01;MsG0380014427.01;MsG0180004978.01;MsG0080048862.01;MsG0480022351.01;MsG0480021020.01;MsG0380017387.01;MsG0280011042.01;MsG0280008262.01;MsG0780038015.01;MsG0480019037.01;MsG0480021831.01;MsG0380011975.01;MsG0480020975.01;MsG0380016507.01;MsG0280010739.01;MsG0480021443.01;MsG0780040436.01;MsG0680030644.01;MsG0180003386.01;MsG06800…	126	0.0435082872928(126/2896)	MsG0280009128.01;MsG0880046106.01;MsG0580025265.01;MsG0680032727.01;MsG0880043897.01;MsG0180005248.01;MsG0180004978.01;MsG0180001497.01;MsG0080048862.01;MsG0480022351.01;MsG0580025853.01;MsG0480021020.01;MsG0880045794.01;MsG0280011042.01;MsG0280008262.01;MsG0880043906.01;MsG0180005060.01;MsG0480021831.01;MsG0380011975.01;MsG0480020975.01;MsG0580029240.01;MsG0480023523.01;MsG0680031655.01;MsG03800…
biological_process	locomotion	GO:0040011	0	0	none	6	0.00281557954012(6/2131)	MsG0480020857.01;MsG0380011697.01;MsG0180000897.01;MsG0180000899.01;MsG0380011702.01;MsG0380011701.01	9	0.00310773480663(9/2896)	MsG0580027716.01;MsG0480020857.01;MsG0380011703.01;MsG0580027607.01;MsG0180000897.01;MsG0380011697.01;MsG0180001828.01;MsG0180000899.01;MsG0380011702.01
biological_process	reproductive process	GO:0022414	3	0.0337078651685(3/89)	MsG0780038015.01;MsG0480019028.01;MsG0780036485.01	49	0.0229938995777(49/2131)	MsG0580025265.01;MsG0480022530.01;MsG0880046106.01;MsG0280007173.01;MsG0580027993.01;MsG0080047899.01;MsG0280009011.01;MsG0280009210.01;MsG0480020145.01;MsG0180005565.01;MsG0780037521.01;MsG0480022535.01;MsG0380017630.01;MsG0380013436.01;MsG0480022180.01;MsG0580027337.01;MsG0280010298.01;MsG0180005940.01;MsG0480020857.01;MsG0780038545.01;MsG0380017567.01;MsG0480020241.01;MsG0280006586.01;MsG03800…	61	0.0210635359116(61/2896)	MsG0580025265.01;MsG0480022530.01;MsG0280010637.01;MsG0380012254.01;MsG0780038545.01;MsG0580027993.01;MsG0480020219.01;MsG0280009510.01;MsG0780038515.01;MsG0280009011.01;MsG0580029039.01;MsG0480020145.01;MsG0180005565.01;MsG0280006582.01;MsG0480022535.01;MsG0280009210.01;MsG0780041418.01;MsG0480020057.01;MsG0580027337.01;MsG0880046106.01;MsG0180005940.01;MsG0480020857.01;MsG0380012251.01;MsG05800…
biological_process	reproduction	GO:0000003	1	0.0112359550562(1/89)	MsG0780038015.01	3	0.00140778977006(3/2131)	MsG0780038015.01;MsG0880046106.01;MsG0580024583.01	3	0.00103591160221(3/2896)	MsG0480020057.01;MsG0880046106.01;MsG0580024583.01
biological_process	cell population proliferation	GO:0008283	0	0	none	1	0.000469263256687(1/2131)	MsG0180005745.01	1	0.000345303867403(1/2896)	MsG0880042913.01
biological_process	cellular component organization or biogenesis	GO:0071840	8	0.0898876404494(8/89)	MsG0380013838.01;MsG0780040015.01;MsG0780036485.01;MsG0180005065.01;MsG0680035895.01;MsG0280008061.01;MsG0480019028.01;MsG0180002439.01	113	0.0530267480056(113/2131)	MsG0280007173.01;MsG0680030638.01;MsG0380015548.01;MsG0180003089.01;MsG0280009429.01;MsG0680030926.01;MsG0480019187.01;MsG0780041120.01;MsG0380013838.01;MsG0780038482.01;MsG0780041198.01;MsG0780036638.01;MsG0680034852.01;MsG0180001029.01;MsG0080048780.01;MsG0480023658.01;MsG0880046975.01;MsG0580029298.01;MsG0780038753.01;MsG0180003241.01;MsG0880045141.01;MsG0280008039.01;MsG0180001027.01;MsG05800…	160	0.0552486187845(160/2896)	MsG0880047143.01;MsG0580024860.01;MsG0480022962.01;MsG0780041418.01;MsG0480019187.01;MsG0780041120.01;MsG0480020978.01;MsG0780039224.01;MsG0280010632.01;MsG0780039596.01;MsG0780041198.01;MsG0780036638.01;MsG0780036854.01;MsG0680034852.01;MsG0480022532.01;MsG0780041327.01;MsG0180001029.01;MsG0480022149.01;MsG0080048780.01;MsG0480022348.01;MsG0280010661.01;MsG0480020393.01;MsG0580029868.01;MsG08800…
biological_process	cellular process	GO:0009987	30	0.337078651685(30/89)	MsG0880047668.01;MsG0380014016.01;MsG0680034664.01;MsG0280006481.01;MsG0480018952.01;MsG0380013838.01;MsG0180005065.01;MsG0180005575.01;MsG0680034290.01;MsG0880047513.01;MsG0380015817.01;MsG0880047232.01;MsG0280008061.01;MsG0880042650.01;MsG0480021808.01;MsG0780036485.01;MsG0680035895.01;MsG0180003413.01;MsG0480019028.01;MsG0780037943.01;MsG0880042541.01;MsG0680033905.01;MsG0580024209.01;MsG08800…	924	0.433599249179(924/2131)	MsG0480019532.01;MsG0380017474.01;MsG0880047322.01;MsG0880043920.01;MsG0480022530.01;MsG0680030629.01;MsG0680035881.01;MsG0480021682.01;MsG0780038922.01;MsG0180005492.01;MsG0280010939.01;MsG0480019187.01;MsG0180004924.01;MsG0780036582.01;MsG0880045229.01;MsG0480020241.01;MsG0480023413.01;MsG0380016367.01;MsG0280008786.01;MsG0880046573.01;MsG0580029901.01;MsG0480022111.01;MsG0880047656.01;MsG08800…	1293	0.446477900552(1293/2896)	MsG0480022530.01;MsG0480021143.01;MsG0380017474.01;MsG0180005648.01;MsG0780041637.01;MsG0180003791.01;MsG0880047322.01;MsG0680033971.01;MsG0880043920.01;MsG0880042641.01;MsG0580029862.01;MsG0680030629.01;MsG0480023945.01;MsG0480018810.01;MsG0480021682.01;MsG0780038922.01;MsG0180003534.01;MsG0280010939.01;MsG0180000638.01;MsG0480019187.01;MsG0780040358.01;MsG0780036582.01;MsG0880045229.01;MsG05800…
biological_process	developmental process	GO:0032502	2	0.0224719101124(2/89)	MsG0780038015.01;MsG0280008061.01	40	0.0187705302675(40/2131)	MsG0880046106.01;MsG0180005565.01;MsG0080047899.01;MsG0080048254.01;MsG0580029691.01;MsG0880043588.01;MsG0480020857.01;MsG0580025117.01;MsG0380016721.01;MsG0180004104.01;MsG0380017387.01;MsG0480021968.01;MsG0180005745.01;MsG0380015828.01;MsG0880046039.01;MsG0180004088.01;MsG0580029039.01;MsG0780038015.01;MsG0780039811.01;MsG0180004541.01;MsG0580028890.01;MsG0080048878.01;MsG0880046713.01;MsG01800…	57	0.019682320442(57/2896)	MsG0580030088.01;MsG0180000028.01;MsG0480020408.01;MsG0880046106.01;MsG0180005565.01;MsG0180005562.01;MsG0880046072.01;MsG0580024679.01;MsG0080047899.01;MsG0480023468.01;MsG0580029691.01;MsG0480020057.01;MsG0280010021.01;MsG0480020294.01;MsG0480020857.01;MsG0680034383.01;MsG0580025117.01;MsG0380014967.01;MsG0380016721.01;MsG0180004104.01;MsG0380017387.01;MsG0480021291.01;MsG0880046039.01;MsG01800…
biological_process	multicellular organismal process	GO:0032501	0	0	none	18	0.00844673862037(18/2131)	MsG0580025265.01;MsG0480020857.01;MsG0080048878.01;MsG0780036538.01;MsG0180004712.01;MsG0080047899.01;MsG0180001003.01;MsG0780040436.01;MsG0780039811.01;MsG0880046039.01;MsG0580029039.01;MsG0380013769.01;MsG0180005291.01;MsG0880043588.01;MsG0180005519.01;MsG0180005565.01;MsG0380017490.01;MsG0580026143.01	20	0.00690607734807(20/2896)	MsG0580025265.01;MsG0180005291.01;MsG0480020408.01;MsG0080048878.01;MsG0180002978.01;MsG0280009510.01;MsG0780040578.01;MsG0580029039.01;MsG0780040436.01;MsG0580024679.01;MsG0880045374.01;MsG0880046039.01;MsG0880043588.01;MsG0080047899.01;MsG0480020857.01;MsG0880046789.01;MsG0580028111.01;MsG0180005565.01;MsG0580025683.01;MsG0580026143.01
biological_process	growth	GO:0040007	0	0	none	3	0.00140778977006(3/2131)	MsG0880046713.01;MsG0380015828.01;MsG0180005519.01	5	0.00172651933702(5/2896)	MsG0580030088.01;MsG0880046713.01;MsG0580026181.01;MsG0180005741.01;MsG0680034383.01
biological_process	rhythmic process	GO:0048511	0	0	none	2	0.000938526513374(2/2131)	MsG0480023945.01;MsG0180005005.01	3	0.00103591160221(3/2896)	MsG0580029330.01;MsG0480023945.01;MsG0180005005.01
biological_process	localization	GO:0051179	4	0.0449438202247(4/89)	MsG0780037943.01;MsG0480022271.01;MsG0580024209.01;MsG0180002439.01	190	0.0891600187705(190/2131)	MsG0480022899.01;MsG0280007098.01;MsG0780040679.01;MsG0680035897.01;MsG0480023578.01;MsG0280006668.01;MsG0380015548.01;MsG0480022861.01;MsG0880042765.01;MsG0580024727.01;MsG0380012445.01;MsG0480021054.01;MsG0380014094.01;MsG0680035899.01;MsG0580025662.01;MsG0480020755.01;MsG0380017387.01;MsG0780041198.01;MsG0580025225.01;MsG0380016976.01;MsG0180003510.01;MsG0480023162.01;MsG0480023307.01;MsG01800…	240	0.0828729281768(240/2896)	MsG0280007098.01;MsG0780036687.01;MsG0780040679.01;MsG0780037917.01;MsG0580025265.01;MsG0780035950.01;MsG0480023578.01;MsG0180004492.01;MsG0180001868.01;MsG0880047143.01;MsG0480023044.01;MsG0480022861.01;MsG0880042765.01;MsG0680034945.01;MsG0280011026.01;MsG0480018890.01;MsG0380012445.01;MsG0480021054.01;MsG0680035899.01;MsG0880044855.01;MsG0480020755.01;MsG0480018391.01;MsG0380017387.01;MsG07800…
biological_process	detoxification	GO:0098754	0	0	none	5	0.00234631628344(5/2131)	MsG0580025998.01;MsG0380017016.01;MsG0480020705.01;MsG0580029511.01;MsG0480020691.01	9	0.00310773480663(9/2896)	MsG0580025998.01;MsG0380015010.01;MsG0480020691.01;MsG0480019997.01;MsG0480020705.01;MsG0580029511.01;MsG0380017016.01;MsG0480020491.01;MsG0380015870.01
biological_process	response to stimulus	GO:0050896	17	0.191011235955(17/89)	MsG0880047668.01;MsG0680032657.01;MsG0380014016.01;MsG0380013838.01;MsG0180005059.01;MsG0580024450.01;MsG0480018952.01;MsG0680035721.01;MsG0380013593.01;MsG0680033905.01;MsG0780036485.01;MsG0180005065.01;MsG0680035895.01;MsG0180005450.01;MsG0180003413.01;MsG0480019028.01;MsG0380015095.01	321	0.150633505397(321/2131)	MsG0880045351.01;MsG0780040518.01;MsG0280010150.01;MsG0680030983.01;MsG0580024131.01;MsG0180004978.01;MsG0280007173.01;MsG0780036272.01;MsG0180006012.01;MsG0880046263.01;MsG0680030969.01;MsG0680032727.01;MsG0680030629.01;MsG0480023945.01;MsG0880045350.01;MsG0180003089.01;MsG0780038922.01;MsG0880043948.01;MsG0380014427.01;MsG0780036787.01;MsG0180004879.01;MsG0680030926.01;MsG0880047613.01;MsG03800…	428	0.147790055249(428/2896)	MsG0680033984.01;MsG0380012541.01;MsG0180006012.01;MsG0880046263.01;MsG0680033393.01;MsG0680030629.01;MsG0480023945.01;MsG0780038922.01;MsG0180005248.01;MsG0680031814.01;MsG0180001497.01;MsG0580025117.01;MsG0380017667.01;MsG0580025024.01;MsG0480020814.01;MsG0380011975.01;MsG0680034959.01;MsG0580029240.01;MsG0380012129.01;MsG0880046675.01;MsG0380016507.01;MsG0180004987.01;MsG0480018539.01;MsG04800…
cellular_component	membrane-enclosed lumen	GO:0031974	0	0	none	5	0.00234631628344(5/2131)	MsG0380015731.01;MsG0880047325.01;MsG0780039847.01;MsG0580029748.01;MsG0580029437.01	9	0.00310773480663(9/2896)	MsG0880043278.01;MsG0280009510.01;MsG0880047325.01;MsG0780039847.01;MsG0380015731.01;MsG0580026742.01;MsG0780040283.01;MsG0880046700.01;MsG0580029437.01
cellular_component	protein-containing complex	GO:0032991	5	0.0561797752809(5/89)	MsG0780036485.01;MsG0380014016.01;MsG0880045275.01;MsG0480019028.01;MsG0180002439.01	104	0.0488033786954(104/2131)	MsG0280007098.01;MsG0380017474.01;MsG0380012445.01;MsG0280007173.01;MsG0680032727.01;MsG0480023945.01;MsG0480021682.01;MsG0280009429.01;MsG0580026771.01;MsG0380014094.01;MsG0780041198.01;MsG0680034421.01;MsG0380016566.01;MsG0680034959.01;MsG0680030759.01;MsG0480018304.01;MsG0180003241.01;MsG0280009996.01;MsG0880045141.01;MsG0280008039.01;MsG0680030463.01;MsG0580025491.01;MsG0580025499.01;MsG03800…	159	0.0549033149171(159/2896)	MsG0380012625.01;MsG0280007098.01;MsG0380017474.01;MsG0380012445.01;MsG0180004492.01;MsG0880047143.01;MsG0680032727.01;MsG0580024678.01;MsG0480023945.01;MsG0480021682.01;MsG0180005755.01;MsG0280008379.01;MsG0280011026.01;MsG0280006870.01;MsG0680032434.01;MsG0680035573.01;MsG0580024139.01;MsG0180002699.01;MsG0780041198.01;MsG0780036909.01;MsG0280011276.01;MsG0280011013.01;MsG0680034959.01;MsG03800…
cellular_component	membrane part	GO:0044425	27	0.303370786517(27/89)	MsG0880047668.01;MsG0380014016.01;MsG0480018434.01;MsG0780040658.01;MsG0380013593.01;MsG0280006762.01;MsG0480018952.01;MsG0580027255.01;MsG0880044037.01;MsG0380014180.01;MsG0780038015.01;MsG0480021808.01;MsG0480022271.01;MsG0480020051.01;MsG0280008061.01;MsG0680030708.01;MsG0880042664.01;MsG0780036485.01;MsG0880041965.01;MsG0180005059.01;MsG0780037943.01;MsG0780040015.01;MsG0880042930.01;MsG07800…	750	0.351947442515(750/2131)	MsG0480022530.01;MsG0380017474.01;MsG0880046427.01;MsG0880043920.01;MsG0680034655.01;MsG0180003210.01;MsG0480021554.01;MsG0280009855.01;MsG0180005848.01;MsG0180004774.01;MsG0680035899.01;MsG0480020241.01;MsG0180004553.01;MsG0280008786.01;MsG0280009210.01;MsG0380015459.01;MsG0180005022.01;MsG0480019037.01;MsG0880044210.01;MsG0680034959.01;MsG0180001969.01;MsG0480018222.01;MsG0380013052.01;MsG05800…	1051	0.362914364641(1051/2896)	MsG0480022530.01;MsG0280011292.01;MsG0380017474.01;MsG0880046427.01;MsG0780037514.01;MsG0680033971.01;MsG0880043920.01;MsG0780041537.01;MsG0180003210.01;MsG0480021554.01;MsG0480018810.01;MsG0280009855.01;MsG0180005248.01;MsG0180003954.01;MsG0780039665.01;MsG0180004774.01;MsG0680031814.01;MsG0180001497.01;MsG0680035899.01;MsG0580025117.01;MsG0280011273.01;MsG0280008786.01;MsG0280010617.01;MsG03800…
cellular_component	extracellular region part	GO:0044421	0	0	none	16	0.00750821210699(16/2131)	MsG0580024517.01;MsG0480022657.01;MsG0580027876.01;MsG0880042838.01;MsG0880046427.01;MsG0580027875.01;MsG0680030638.01;MsG0380016040.01;MsG0380015731.01;MsG0580028371.01;MsG0580025876.01;MsG0580028377.01;MsG0580024529.01;MsG0580025870.01;MsG0380015676.01;MsG0480021298.01	21	0.00725138121547(21/2896)	MsG0580024517.01;MsG0480022657.01;MsG0880047503.01;MsG0180005142.01;MsG0880046427.01;MsG0580025870.01;MsG0580027863.01;MsG0580027875.01;MsG0380016040.01;MsG0380015731.01;MsG0580025876.01;MsG0580028377.01;MsG0280009992.01;MsG0880042727.01;MsG0280007934.01;MsG0580027876.01;MsG0080048038.01;MsG0380015676.01;MsG0180005131.01;MsG0480021298.01;MsG0580024529.01
cellular_component	organelle part	GO:0044422	7	0.0786516853933(7/89)	MsG0380014016.01;MsG0780040015.01;MsG0780036485.01;MsG0180005065.01;MsG0780041212.01;MsG0880045275.01;MsG0480019028.01	142	0.0666353824496(142/2131)	MsG0280006668.01;MsG0880043870.01;MsG0280007173.01;MsG0480021682.01;MsG0280006805.01;MsG0280009429.01;MsG0580026771.01;MsG0480020755.01;MsG0380017962.01;MsG0680034852.01;MsG0480023162.01;MsG0080048780.01;MsG0180003114.01;MsG0780040472.01;MsG0680030759.01;MsG0180003350.01;MsG0180000576.01;MsG0180004739.01;MsG0280010274.01;MsG0580025662.01;MsG0280009996.01;MsG0380016259.01;MsG0280008039.01;MsG07800…	220	0.0759668508287(220/2896)	MsG0180005556.01;MsG0180004492.01;MsG0880046700.01;MsG0880046072.01;MsG0880047143.01;MsG0580024860.01;MsG0480021682.01;MsG0280006805.01;MsG0280011026.01;MsG0780041418.01;MsG0480021054.01;MsG0880047040.01;MsG0480020755.01;MsG0380017962.01;MsG0680034852.01;MsG0280011276.01;MsG0180005060.01;MsG0280008007.01;MsG0280011013.01;MsG0080048780.01;MsG0180003114.01;MsG0480020595.01;MsG0780040472.01;MsG02800…
cellular_component	virion part	GO:0044423	0	0	none	1	0.000469263256687(1/2131)	MsG0880044262.01	1	0.000345303867403(1/2896)	MsG0880044262.01
cellular_component	organelle	GO:0043226	11	0.123595505618(11/89)	MsG0780040015.01;MsG0680035721.01;MsG0580027255.01;MsG0680034750.01;MsG0280008061.01;MsG0180003413.01;MsG0780040377.01;MsG0780041212.01;MsG0880045275.01;MsG0480019028.01;MsG0380013875.01	409	0.191928671985(409/2131)	MsG0880046427.01;MsG0180006012.01;MsG0680034655.01;MsG0680030629.01;MsG0680035881.01;MsG0480021682.01;MsG0180004774.01;MsG0480019187.01;MsG0380014094.01;MsG0580028560.01;MsG0380016367.01;MsG0580027687.01;MsG0480021803.01;MsG0480023317.01;MsG0380016873.01;MsG0180001085.01;MsG0480022820.01;MsG0380013491.01;MsG0880046263.01;MsG0580028416.01;MsG0880046429.01;MsG0780040436.01;MsG0380011872.01;MsG04800…	559	0.193024861878(559/2896)	MsG0480021143.01;MsG0880046427.01;MsG0180006012.01;MsG0880046263.01;MsG0680030629.01;MsG0480023945.01;MsG0580024975.01;MsG0480021682.01;MsG0180005248.01;MsG0180003954.01;MsG0180004774.01;MsG0780041370.01;MsG0480019187.01;MsG0580028560.01;MsG0380016367.01;MsG0280008601.01;MsG0880043906.01;MsG0480021803.01;MsG0380016873.01;MsG0480020595.01;MsG0180001085.01;MsG0480022820.01;MsG0180001072.01;MsG03800…
cellular_component	membrane	GO:0016020	17	0.191011235955(17/89)	MsG0380014016.01;MsG0880042664.01;MsG0480022311.01;MsG0580024209.01;MsG0780040658.01;MsG0380013593.01;MsG0580028023.01;MsG0880044037.01;MsG0780036485.01;MsG0880042930.01;MsG0180005575.01;MsG0480022271.01;MsG0480018434.01;MsG0680030362.01;MsG0480018562.01;MsG0880045275.01;MsG0780037943.01	381	0.178789300798(381/2131)	MsG0480022530.01;MsG0180003210.01;MsG0180005848.01;MsG0180004774.01;MsG0680035899.01;MsG0480020241.01;MsG0680030994.01;MsG0280008262.01;MsG0180005022.01;MsG0880044210.01;MsG0480022311.01;MsG0180001085.01;MsG0380013052.01;MsG0880042019.01;MsG0580028416.01;MsG0580025662.01;MsG0780038753.01;MsG0280008226.01;MsG0180004168.01;MsG0280008717.01;MsG0480023250.01;MsG0780038083.01;MsG0480018334.01;MsG02800…	525	0.181284530387(525/2896)	MsG0480022530.01;MsG0780035950.01;MsG0180003210.01;MsG0280011026.01;MsG0180004774.01;MsG0680035899.01;MsG0180001094.01;MsG0680030994.01;MsG0280008262.01;MsG0180005022.01;MsG0580025024.01;MsG0480020814.01;MsG0480020345.01;MsG0880047233.01;MsG0180001085.01;MsG0380013052.01;MsG0280008219.01;MsG0880042019.01;MsG0180000961.01;MsG0280008206.01;MsG0880044855.01;MsG0780038753.01;MsG0780039186.01;MsG02800…
cellular_component	cell junction	GO:0030054	0	0	none	6	0.00281557954012(6/2131)	MsG0280010378.01;MsG0480023759.01;MsG0780041447.01;MsG0380016662.01;MsG0180005225.01;MsG0780041177.01	8	0.00276243093923(8/2896)	MsG0480020463.01;MsG0480023759.01;MsG0780041447.01;MsG0680034649.01;MsG0380016662.01;MsG0180005225.01;MsG0180001828.01;MsG0780041177.01
cellular_component	extracellular region	GO:0005576	4	0.0449438202247(4/89)	MsG0880047668.01;MsG0780038015.01;MsG0280008394.01;MsG0580024450.01	69	0.0323791647114(69/2131)	MsG0580027618.01;MsG0180003604.01;MsG0880046106.01;MsG0580024758.01;MsG0080048057.01;MsG0480022474.01;MsG0480022424.01;MsG0480021518.01;MsG0580026206.01;MsG0080047831.01;MsG0180004768.01;MsG0880047494.01;MsG0480019348.01;MsG0580025440.01;MsG0180006174.01;MsG0280008388.01;MsG0780038307.01;MsG0380015529.01;MsG0880047495.01;MsG0380016721.01;MsG0380016040.01;MsG0780040614.01;MsG0180005745.01;MsG03800…	112	0.0386740331492(112/2896)	MsG0280006455.01;MsG0880046106.01;MsG0480021697.01;MsG0880046072.01;MsG0280010632.01;MsG0080048046.01;MsG0180005764.01;MsG0580027616.01;MsG0380015869.01;MsG0780039910.01;MsG0380017307.01;MsG0480023349.01;MsG0180004424.01;MsG0780036835.01;MsG0780038753.01;MsG0380011703.01;MsG0280006457.01;MsG0680030380.01;MsG0480023907.01;MsG0780040610.01;MsG0180003360.01;MsG0780040611.01;MsG0780038617.01;MsG07800…
cellular_component	nucleoid	GO:0009295	0	0	none	0	0	none	3	0.00103591160221(3/2896)	MsG0880043278.01;MsG0180004006.01;MsG0180002545.01
cellular_component	other organism part	GO:0044217	0	0	none	4	0.00187705302675(4/2131)	MsG0180003582.01;MsG0180001003.01;MsG0780038715.01;MsG0880045875.01	2	0.000690607734807(2/2896)	MsG0680031655.01;MsG0780038715.01
cellular_component	cell part	GO:0044464	27	0.303370786517(27/89)	MsG0880047668.01;MsG0380014016.01;MsG0780040658.01;MsG0380013593.01;MsG0680034750.01;MsG0680034664.01;MsG0180005575.01;MsG0480022271.01;MsG0380015817.01;MsG0880047232.01;MsG0280008061.01;MsG0880042650.01;MsG0580027255.01;MsG0780036485.01;MsG0180003413.01;MsG0780040377.01;MsG0480019028.01;MsG0380013875.01;MsG0880042541.01;MsG0780040015.01;MsG0680035721.01;MsG0280007121.01;MsG0180005065.01;MsG06800…	820	0.384795870483(820/2131)	MsG0480023945.01;MsG0480022530.01;MsG0380017474.01;MsG0880046427.01;MsG0180006012.01;MsG0880042641.01;MsG0680030629.01;MsG0380017000.01;MsG0480021682.01;MsG0780038922.01;MsG0180005492.01;MsG0180004774.01;MsG0380016662.01;MsG0480019187.01;MsG0380012069.01;MsG0380014094.01;MsG0680035899.01;MsG0480020241.01;MsG0580028560.01;MsG0380016367.01;MsG0680030994.01;MsG0280008262.01;MsG0580027687.01;MsG08800…	1145	0.395372928177(1145/2896)	MsG0480022530.01;MsG0480021143.01;MsG0380017474.01;MsG0080048563.01;MsG0880046427.01;MsG0180006012.01;MsG0880042641.01;MsG0280009667.01;MsG0680030629.01;MsG0480023945.01;MsG0580024975.01;MsG0480021682.01;MsG0780038922.01;MsG0180005248.01;MsG0180005492.01;MsG0180003954.01;MsG0180004774.01;MsG0780041370.01;MsG0480019187.01;MsG0180000536.01;MsG0680035899.01;MsG0380017248.01;MsG0580028560.01;MsG04800…
cellular_component	supramolecular complex	GO:0099080	1	0.0112359550562(1/89)	MsG0780041212.01	10	0.00469263256687(10/2131)	MsG0680030949.01;MsG0080047993.01;MsG0780040472.01;MsG0580025977.01;MsG0280007253.01;MsG0780040365.01;MsG0580029881.01;MsG0780039446.01;MsG0480018845.01;MsG0880046378.01	14	0.00483425414365(14/2896)	MsG0880047229.01;MsG0580025977.01;MsG0380017858.01;MsG0780040472.01;MsG0180005741.01;MsG0480023922.01;MsG0780039224.01;MsG0880046072.01;MsG0780040365.01;MsG0580029881.01;MsG0780039446.01;MsG0580025392.01;MsG0880046378.01;MsG0080048399.01
molecular_function	translation regulator activity	GO:0045182	2	0.0224719101124(2/89)	MsG0680035721.01;MsG0780040015.01	11	0.00516189582356(11/2131)	MsG0080048687.01;MsG0680035716.01;MsG0280007594.01;MsG0680035721.01;MsG0280010751.01;MsG0680032727.01;MsG0880042619.01;MsG0280007591.01;MsG0680034421.01;MsG0480018324.01;MsG0080048933.01	15	0.00517955801105(15/2896)	MsG0480018323.01;MsG0680035845.01;MsG0080048687.01;MsG0280007594.01;MsG0280009667.01;MsG0280010751.01;MsG0080049129.01;MsG0680032727.01;MsG0680035723.01;MsG0180004918.01;MsG0880042619.01;MsG0780039853.01;MsG0280007591.01;MsG0680035731.01;MsG0480018324.01
molecular_function	transcription regulator activity	GO:0140110	1	0.0112359550562(1/89)	MsG0680034750.01	109	0.0511496949789(109/2131)	MsG0380017380.01;MsG0180000284.01;MsG0480023413.01;MsG0180002136.01;MsG0880046263.01;MsG0480020539.01;MsG0880046123.01;MsG0280007414.01;MsG0480023383.01;MsG0580028560.01;MsG0480021020.01;MsG0280011042.01;MsG0580028611.01;MsG0480023317.01;MsG0580025740.01;MsG0480020860.01;MsG0880046129.01;MsG0280007941.01;MsG0480023016.01;MsG0880046429.01;MsG0180004830.01;MsG0180000373.01;MsG0180003830.01;MsG01800…	131	0.0452348066298(131/2896)	MsG0280009128.01;MsG0380017380.01;MsG0480023413.01;MsG0180002136.01;MsG0180004492.01;MsG0480020539.01;MsG0880046123.01;MsG0480023383.01;MsG0580028560.01;MsG0480021020.01;MsG0280008601.01;MsG0280011042.01;MsG0180006255.01;MsG0580024826.01;MsG0480022495.01;MsG0380018000.01;MsG0780038153.01;MsG0280010588.01;MsG0480020860.01;MsG0680034750.01;MsG0880046129.01;MsG0480023119.01;MsG0480021019.01;MsG04800…
molecular_function	structural molecule activity	GO:0005198	0	0	none	20	0.00938526513374(20/2131)	MsG0280010049.01;MsG0080048705.01;MsG0180004377.01;MsG0080049039.01;MsG0380018066.01;MsG0380015971.01;MsG0780040472.01;MsG0180004381.01;MsG0780039228.01;MsG0880044262.01;MsG0180003888.01;MsG0380015111.01;MsG0480021682.01;MsG0180005961.01;MsG0180005291.01;MsG0480018845.01;MsG0780040365.01;MsG0480020690.01;MsG0080048497.01;MsG0880044339.01	39	0.0134668508287(39/2896)	MsG0080048705.01;MsG0280006870.01;MsG0880044003.01;MsG0780040365.01;MsG0280007831.01;MsG0480021682.01;MsG0380017703.01;MsG0480023314.01;MsG0280010049.01;MsG0380017858.01;MsG0180004276.01;MsG0580024139.01;MsG0480021063.01;MsG0680031683.01;MsG0180005361.01;MsG0080049068.01;MsG0180005961.01;MsG0180003729.01;MsG0280011013.01;MsG0380014470.01;MsG0380018066.01;MsG0780037184.01;MsG0780040472.01;MsG07800…
molecular_function	protein folding chaperone	GO:0044183	0	0	none	3	0.00140778977006(3/2131)	MsG0680031848.01;MsG0880047581.01;MsG0580024131.01	5	0.00172651933702(5/2896)	MsG0680031848.01;MsG0880047581.01;MsG0880046765.01;MsG0380017427.01;MsG0580029862.01
molecular_function	molecular carrier activity	GO:0140104	0	0	none	0	0	none	2	0.000690607734807(2/2896)	MsG0880046991.01;MsG0780038455.01
molecular_function	antioxidant activity	GO:0016209	1	0.0112359550562(1/89)	MsG0880047668.01	29	0.0136086344439(29/2131)	MsG0580024758.01;MsG0180003601.01;MsG0480021518.01;MsG0180004768.01;MsG0480019348.01;MsG0780041537.01;MsG0280007069.01;MsG0580024636.01;MsG0180004895.01;MsG0180004202.01;MsG0180001150.01;MsG0280010150.01;MsG0180003296.01;MsG0480020691.01;MsG0480022820.01;MsG0780041075.01;MsG0180003604.01;MsG0480020705.01;MsG0580028577.01;MsG0180001827.01;MsG0080048621.01;MsG0280010425.01;MsG0580024643.01;MsG07800…	45	0.0155386740331(45/2896)	MsG0580024758.01;MsG0280006455.01;MsG0680030615.01;MsG0180003601.01;MsG0380015271.01;MsG0480021518.01;MsG0280007689.01;MsG0580025023.01;MsG0480020691.01;MsG0180004768.01;MsG0680030631.01;MsG0280010617.01;MsG0380016478.01;MsG0780041537.01;MsG0280007069.01;MsG0180002545.01;MsG0580024636.01;MsG0180004895.01;MsG0180004202.01;MsG0880042727.01;MsG0580025024.01;MsG0680030613.01;MsG0480020814.01;MsG07800…
molecular_function	cargo adaptor activity	GO:0140312	0	0	none	0	0	none	1	0.000345303867403(1/2896)	MsG0580030203.01
molecular_function	transporter activity	GO:0005215	3	0.0337078651685(3/89)	MsG0480022271.01;MsG0580024209.01;MsG0780037943.01	137	0.0642890661661(137/2131)	MsG0280007098.01;MsG0780040679.01;MsG0680035897.01;MsG0480023578.01;MsG0480022861.01;MsG0880042765.01;MsG0080048940.01;MsG0880047613.01;MsG0480021054.01;MsG0680035899.01;MsG0580025662.01;MsG0180004121.01;MsG0180003146.01;MsG0280008226.01;MsG0180003547.01;MsG0180001029.01;MsG0880043656.01;MsG0680030719.01;MsG0880043870.01;MsG0880044855.01;MsG0780040803.01;MsG0480023307.01;MsG0880047256.01;MsG01800…	195	0.0673342541436(195/2896)	MsG0280007098.01;MsG0780036687.01;MsG0780040679.01;MsG0780037917.01;MsG0780035950.01;MsG0580026505.01;MsG0480023578.01;MsG0180004492.01;MsG0180001868.01;MsG0480023044.01;MsG0480022861.01;MsG0880042765.01;MsG0080048940.01;MsG0280011026.01;MsG0480018890.01;MsG0480021054.01;MsG0680035899.01;MsG0880044855.01;MsG0180004121.01;MsG0380016494.01;MsG0280008226.01;MsG0280011276.01;MsG0180001029.01;MsG08800…
molecular_function	toxin activity	GO:0090729	2	0.0224719101124(2/89)	MsG0380013239.01;MsG0380013213.01	1	0.000469263256687(1/2131)	MsG0380012938.01	5	0.00172651933702(5/2896)	MsG0380013214.01;MsG0380013212.01;MsG0380015281.01;MsG0380013239.01;MsG0380013213.01
molecular_function	molecular function regulator	GO:0098772	1	0.0112359550562(1/89)	MsG0680030362.01	39	0.0183012670108(39/2131)	MsG0680033601.01;MsG0480023406.01;MsG0180001164.01;MsG0580025846.01;MsG0380017000.01;MsG0380016164.01;MsG0080047831.01;MsG0680035558.01;MsG0080048687.01;MsG0880046281.01;MsG0280010240.01;MsG0480019644.01;MsG0480022993.01;MsG0380015520.01;MsG0180005745.01;MsG0880047081.01;MsG0280007479.01;MsG0680032617.01;MsG0680030949.01;MsG0780038307.01;MsG0280006566.01;MsG0480019217.01;MsG0480018569.01;MsG01800…	50	0.0172651933702(50/2896)	MsG0680034313.01;MsG0380016261.01;MsG0680035382.01;MsG0280011409.01;MsG0180001164.01;MsG0580025846.01;MsG0580029032.01;MsG0280007908.01;MsG0880042944.01;MsG0780040283.01;MsG0380016164.01;MsG0480022993.01;MsG0180004860.01;MsG0280007911.01;MsG0480023406.01;MsG0780041316.01;MsG0580024488.01;MsG0880047084.01;MsG0280007910.01;MsG0480019644.01;MsG0880045765.01;MsG0380015520.01;MsG0380014293.01;MsG02800…
molecular_function	small molecule sensor activity	GO:0140299	0	0	none	3	0.00140778977006(3/2131)	MsG0580025117.01;MsG0180004712.01;MsG0880045617.01	3	0.00103591160221(3/2896)	MsG0580030088.01;MsG0580025117.01;MsG0880045369.01
molecular_function	binding	GO:0005488	48	0.539325842697(48/89)	MsG0880047668.01;MsG0380014016.01;MsG0180005059.01;MsG0480018434.01;MsG0780039544.01;MsG0580028023.01;MsG0380013593.01;MsG0680034750.01;MsG0380016128.01;MsG0380015191.01;MsG0680034664.01;MsG0880042584.01;MsG0680035721.01;MsG0480018952.01;MsG0380012192.01;MsG0380013838.01;MsG0880044037.01;MsG0180005575.01;MsG0680034290.01;MsG0880047513.01;MsG0380015817.01;MsG0880047232.01;MsG0880047769.01;MsG08800…	1162	0.54528390427(1162/2131)	MsG0480023945.01;MsG0480019532.01;MsG0380015907.01;MsG0380017474.01;MsG0580027208.01;MsG0380015899.01;MsG0680035588.01;MsG0180006012.01;MsG0480022530.01;MsG0180001258.01;MsG0180003210.01;MsG0680030629.01;MsG0480021554.01;MsG0580024411.01;MsG0280009642.01;MsG0280009855.01;MsG0180005848.01;MsG0780038922.01;MsG0280010939.01;MsG0180004774.01;MsG0480018559.01;MsG0480022833.01;MsG0480019187.01;MsG01800…	1562	0.539364640884(1562/2896)	MsG0480022530.01;MsG0180006012.01;MsG0580029862.01;MsG0180003210.01;MsG0480021554.01;MsG0280009642.01;MsG0280011026.01;MsG0180004774.01;MsG0780041370.01;MsG0680031814.01;MsG0580028560.01;MsG0180003292.01;MsG0180005022.01;MsG0480022532.01;MsG0880047656.01;MsG0480020814.01;MsG0880047233.01;MsG0380012129.01;MsG0380016530.01;MsG0380011663.01;MsG0280010868.01;MsG0580024178.01;MsG0480021996.01;MsG03800…
molecular_function	nutrient reservoir activity	GO:0045735	3	0.0337078651685(3/89)	MsG0280008394.01;MsG0380013213.01;MsG0380013239.01	11	0.00516189582356(11/2131)	MsG0280008388.01;MsG0380012938.01;MsG0280010387.01;MsG0880044042.01;MsG0780040747.01;MsG0780039813.01;MsG0180005588.01;MsG0180003360.01;MsG0680030382.01;MsG0780039811.01;MsG0780041447.01	22	0.00759668508287(22/2896)	MsG0280010387.01;MsG0380015281.01;MsG0180000252.01;MsG0380015605.01;MsG0380013213.01;MsG0280008388.01;MsG0180003954.01;MsG0480018697.01;MsG0880042727.01;MsG0380013212.01;MsG0380013239.01;MsG0680032932.01;MsG0680030382.01;MsG0180004424.01;MsG0280008394.01;MsG0580024943.01;MsG0680033022.01;MsG0780041447.01;MsG0380013214.01;MsG0680030380.01;MsG0180003360.01;MsG0680030379.01
molecular_function	protein tag	GO:0031386	0	0	none	4	0.00187705302675(4/2131)	MsG0780041687.01;MsG0480022347.01;MsG0180002394.01;MsG0180003601.01	3	0.00103591160221(3/2896)	MsG0480022347.01;MsG0180002394.01;MsG0180003601.01
molecular_function	molecular transducer activity	GO:0060089	2	0.0224719101124(2/89)	MsG0380013593.01;MsG0780036485.01	47	0.0220553730643(47/2131)	MsG0180005373.01;MsG0780038836.01;MsG0380013593.01;MsG0480022607.01;MsG0280010737.01;MsG0580028051.01;MsG0480023945.01;MsG0780038825.01;MsG0380015520.01;MsG0580029430.01;MsG0380014748.01;MsG0880042846.01;MsG0380014293.01;MsG0680030994.01;MsG0180000151.01;MsG0480022445.01;MsG0380015693.01;MsG0680030558.01;MsG0680033964.01;MsG0780038829.01;MsG0180005279.01;MsG0680032138.01;MsG0680032779.01;MsG02800…	54	0.0186464088398(54/2896)	MsG0180005373.01;MsG0380015931.01;MsG0480022607.01;MsG0280010737.01;MsG0480023945.01;MsG0180001108.01;MsG0280007911.01;MsG0780038825.01;MsG0380015520.01;MsG0880045927.01;MsG0580029430.01;MsG0280007910.01;MsG0380016398.01;MsG0680030994.01;MsG0180000151.01;MsG0380017667.01;MsG0380015693.01;MsG0280010739.01;MsG0680030558.01;MsG0680033964.01;MsG0780038829.01;MsG0880045385.01;MsG0780038826.01;MsG02800…
molecular_function	catalytic activity	GO:0003824	46	0.516853932584(46/89)	MsG0880047668.01;MsG0380014016.01;MsG0480018434.01;MsG0280008196.01;MsG0580028023.01;MsG0380013593.01;MsG0280007121.01;MsG0880042650.01;MsG0380016128.01;MsG0680034664.01;MsG0380013838.01;MsG0580024450.01;MsG0880044037.01;MsG0780038318.01;MsG0180005575.01;MsG0880047513.01;MsG0680030362.01;MsG0880047232.01;MsG0280008193.01;MsG0480020669.01;MsG0680033903.01;MsG0480022311.01;MsG0480021808.01;MsG07800…	1177	0.552322853121(1177/2131)	MsG0480019532.01;MsG0680032516.01;MsG0380017474.01;MsG0580027208.01;MsG0880046427.01;MsG0880047322.01;MsG0880043920.01;MsG0480022530.01;MsG0180001258.01;MsG0180003210.01;MsG0680030629.01;MsG0480021554.01;MsG0280009855.01;MsG0180005848.01;MsG0780038922.01;MsG0880042556.01;MsG0280010939.01;MsG0380014605.01;MsG0180004774.01;MsG0780036221.01;MsG0480019187.01;MsG0180004924.01;MsG0380014094.01;MsG08800…	1647	0.568715469613(1647/2896)	MsG0480022530.01;MsG0580029862.01;MsG0180003210.01;MsG0480021554.01;MsG0680035612.01;MsG0180004774.01;MsG0780041370.01;MsG0580025627.01;MsG0880046573.01;MsG0280008262.01;MsG0180005022.01;MsG0780036854.01;MsG0880047656.01;MsG0480020814.01;MsG0880047233.01;MsG0380013491.01;MsG0380016507.01;MsG0380011663.01;MsG0180004987.01;MsG0580024178.01;MsG0380014123.01;MsG0380015231.01;MsG0580027083.01;MsG07800…
