# Supplementary material for: Identification of Salt-Responsive Genes in Melatonin Regulated Alfalfa Salt Tolerance by Transcriptome Analysis
Source: Preprints.org preprint supplement (doi:10.20944/preprints202403.1815.v1), 2024-03-29
Supplement: Supplementary file 3 [file Table S4.xlsx]

## Sheet: kegg_enrich_geneset_list_gene
Supplemental table S4. The KEGG enrich pathway was analyzed using R script (WLNMT_vs_WLCK)
#Study_num	Term	Database	ID	Ratio_in_study	Ratio_in_pop	P-Value	Corrected P-Value	Genes	Hyperlink	typeII	typeI
48	Phenylpropanoid biosynthesis	KEGG PATHWAY	map00940	48/1135	261/18577	5.39449e-12	6.31156e-10	MsG0280007689.01|MsG0780040942.01|MsG0280006455.01|MsG0580024758.01|MsG0580024256.01|MsG0180003504.01|MsG0180003542.01|MsG0580028603.01|MsG0280007744.01|MsG0580024933.01|MsG0880045664.01|MsG0580025023.01|MsG0180004768.01|MsG0680030631.01|MsG0280010617.01|MsG0580024932.01|MsG0880045634.01|MsG0380016745.01|MsG0780040945.01|MsG0580024636.01|MsG0180004202.01|MsG0580025389.01|MsG0880047492.01|MsG07800…	http://www.genome.jp/kegg-bin/show_pathway?map=map00940&multi_query=K13065+white,red%0d%0aK10775+white,blue%0d%0aK00083+white,red%0d%0aK12356+white,blue%0d%0aK11188+white,red%0d%0aK01904+white,pink%0d%0aK09755+white,blue%0d%0aK00430+white,pink%0d%0aK18368+white,blue%0d%0aK00487+white,blue%0d%0aK00588+white,blue%0d%0aK22395+white,blue%0d%0aK09753+white,blue%0d%0a	Biosynthesis of other secondary metabolites	Metabolism
23	Tropane, piperidine and pyridine alkaloid biosynthesis	KEGG PATHWAY	map00960	23/1135	71/18577	1.51002e-11	8.8336e-10	MsG0180005357.01|MsG0380016128.01|MsG0580024260.01|MsG0580024218.01|MsG0780036661.01|MsG0380015350.01|MsG0580024220.01|MsG0180005622.01|MsG0880046945.01|MsG0080048347.01|MsG0780038839.01|MsG0280009253.01|MsG0080048345.01|MsG0180000576.01|MsG0380016127.01|MsG0080048352.01|MsG0880046942.01|MsG0580024217.01|MsG0380016129.01|MsG0180005358.01|MsG0080048348.01|MsG0880046071.01|MsG0180005356.01	http://www.genome.jp/kegg-bin/show_pathway?map=map00960&multi_query=K00811+white,red%0d%0aK00276+white,pink%0d%0aK08081+white,red%0d%0aK00660+white,blue%0d%0a	Biosynthesis of other secondary metabolites	Metabolism
21	Isoflavonoid biosynthesis	KEGG PATHWAY	map00943	21/1135	63/18577	6.26884e-11	2.44485e-09	MsG0480019510.01|MsG0180005648.01|MsG0780036582.01|MsG0880045930.01|MsG0480022309.01|MsG0780040613.01|MsG0680030960.01|MsG0580024986.01|MsG0280008072.01|MsG0780040614.01|MsG0480022308.01|MsG0480022833.01|MsG0780036961.01|MsG0780039576.01|MsG0480019527.01|MsG0780040610.01|MsG0480022310.01|MsG0780040611.01|MsG0580024990.01|MsG0780040612.01|MsG0480022311.01	http://www.genome.jp/kegg-bin/show_pathway?map=map00943&multi_query=K13262+white,blue%0d%0aK13260+white,blue%0d%0aK22932+white,red%0d%0aK13265+white,blue%0d%0aK13264+white,blue%0d%0aK13258+white,blue%0d%0aK25075+white,blue%0d%0aK13259+white,blue%0d%0aK13257+white,blue%0d%0aK05281+white,blue%0d%0a	Biosynthesis of other secondary metabolites	Metabolism
24	Flavonoid biosynthesis	KEGG PATHWAY	map00941	24/1135	104/18577	1.19646e-08	3.49964e-07	MsG0180005357.01|MsG0380016128.01|MsG0580024260.01|MsG0580024218.01|MsG0580028603.01|MsG0780036661.01|MsG0880045634.01|MsG0380016086.01|MsG0580030135.01|MsG0580024220.01|MsG0080048347.01|MsG0180006187.01|MsG0280009253.01|MsG0880045912.01|MsG0380016127.01|MsG0080048352.01|MsG0580030133.01|MsG0580024217.01|MsG0380016129.01|MsG0180000131.01|MsG0180005358.01|MsG0080048348.01|MsG0080048345.01|MsG01800…	http://www.genome.jp/kegg-bin/show_pathway?map=map00941&multi_query=K08243+white,blue%0d%0aK13065+white,red%0d%0aK13082+white,red%0d%0aK01859+white,blue%0d%0aK00660+white,blue%0d%0aK00588+white,blue%0d%0aK00487+white,blue%0d%0a	Biosynthesis of other secondary metabolites	Metabolism
44	Starch and sucrose metabolism	KEGG PATHWAY	map00500	44/1135	289/18577	1.89481e-08	4.43384e-07	MsG0580028893.01|MsG0680034847.01|MsG0380013635.01|MsG0580026330.01|MsG0180004376.01|MsG0480021150.01|MsG0780040339.01|MsG0380011756.01|MsG0380011674.01|MsG0180004835.01|MsG0180000436.01|MsG0380014678.01|MsG0480021135.01|MsG0880042591.01|MsG0680031683.01|MsG0680034844.01|MsG0680034974.01|MsG0680031684.01|MsG0480023682.01|MsG0880046084.01|MsG0680034969.01|MsG0380017934.01|MsG0480021267.01|MsG06800…	http://www.genome.jp/kegg-bin/show_pathway?map=map00500&multi_query=K13679+white,red%0d%0aK00847+white,pink%0d%0aK00975+white,red%0d%0aK01177+white,pink%0d%0aK01835+white,red%0d%0aK01179+white,pink%0d%0aK00703+white,red%0d%0aK00705+white,red%0d%0aK00700+white,red%0d%0aK00688+white,red%0d%0aK00963+white,red%0d%0aK01188+white,pink%0d%0aK01193+white,pink%0d%0aK05349+white,blue%0d%0aK00695+white,blue…	Carbohydrate metabolism	Metabolism
31	Glutathione metabolism	KEGG PATHWAY	map00480	31/1135	186/18577	3.13243e-07	6.10824e-06	MsG0580025998.01|MsG0180002272.01|MsG0280009757.01|MsG0380015271.01|MsG0280009761.01|MsG0280009767.01|MsG0780038922.01|MsG0180004879.01|MsG0580024232.01|MsG0880044131.01|MsG0580026148.01|MsG0680034195.01|MsG0380017037.01|MsG0780038925.01|MsG0480020814.01|MsG0480018904.01|MsG0180006126.01|MsG0780041474.01|MsG0780038924.01|MsG0480022820.01|MsG0580027887.01|MsG0380015009.01|MsG0280009756.01|MsG03800…	http://www.genome.jp/kegg-bin/show_pathway?map=map00480&multi_query=K21888+white,red%0d%0aK00797+white,red%0d%0aK11188+white,red%0d%0aK00799+white,pink%0d%0aK00036+white,red%0d%0aK01581+white,blue%0d%0aK00434+white,red%0d%0a	Metabolism of other amino acids	Metabolism
17	Circadian rhythm - plant	KEGG PATHWAY	map04712	17/1135	70/18577	7.36361e-07	1.23078e-05	MsG0080048347.01|MsG0580024220.01|MsG0080048352.01|MsG0180005357.01|MsG0280009253.01|MsG0780036661.01|MsG0580024217.01|MsG0080048348.01|MsG0380016129.01|MsG0380016127.01|MsG0580024260.01|MsG0580024218.01|MsG0480023945.01|MsG0180005358.01|MsG0380016128.01|MsG0080048345.01|MsG0180005356.01	http://www.genome.jp/kegg-bin/show_pathway?map=map04712&multi_query=K12116+white,red%0d%0aK00660+white,blue%0d%0a	Environmental adaptation	Organismal Systems
17	Porphyrin metabolism	KEGG PATHWAY	map00860	17/1135	72/18577	1.12856e-06	1.65052e-05	MsG0580028335.01|MsG0080048563.01|MsG0380018058.01|MsG0780040321.01|MsG0480021803.01|MsG0580024435.01|MsG0380016367.01|MsG0380017727.01|MsG0480022592.01|MsG0080048059.01|MsG0380017262.01|MsG0180001072.01|MsG0080049004.01|MsG0280006805.01|MsG0380017728.01|MsG0580030199.01|MsG0480023558.01	http://www.genome.jp/kegg-bin/show_pathway?map=map00860&multi_query=K02492+white,pink%0d%0aK21480+white,blue%0d%0aK01698+white,red%0d%0aK13600+white,red%0d%0aK01749+white,red%0d%0aK19073+white,red%0d%0aK03403+white,red%0d%0aK04035+white,red%0d%0aK03428+white,red%0d%0aK03405+white,red%0d%0aK00228+white,red%0d%0aK01772+white,blue%0d%0aK01845+white,red%0d%0aK22013+white,blue%0d%0a	Metabolism of cofactors and vitamins	Metabolism
53	Plant-pathogen interaction	KEGG PATHWAY	map04626	53/1135	440/18577	1.7443e-06	2.26758e-05	MsG0580028980.01|MsG0580024829.01|MsG0780041537.01|MsG0780039334.01|MsG0880047235.01|MsG0380014163.01|MsG0880047444.01|MsG0380015931.01|MsG0080049128.01|MsG0780038147.01|MsG0280007934.01|MsG0580025095.01|MsG0280006794.01|MsG0380011981.01|MsG0780041753.01|MsG0880047171.01|MsG0580025278.01|MsG0480020857.01|MsG0280006435.01|MsG0080048967.01|MsG0380014920.01|MsG0580025399.01|MsG0580028560.01|MsG08800…	http://www.genome.jp/kegg-bin/show_pathway?map=map04626&multi_query=K13449+white,blue%0d%0aK13416+white,blue%0d%0aK13456+white,blue%0d%0aK13412+white,pink%0d%0aK18875+white,blue%0d%0aK13457+white,blue%0d%0aK13448+white,blue%0d%0aK01373+white,pink%0d%0aK13429+white,blue%0d%0aK13426+white,blue%0d%0aK15397+white,pink%0d%0aK13433+white,blue%0d%0aK13447+white,pink%0d%0aK05391+white,pink%0d%0aK20536+wh…	Environmental adaptation	Organismal Systems
20	Biosynthesis of various plant secondary metabolites	KEGG PATHWAY	map00999	20/1135	109/18577	8.73555e-06	0.000102206	MsG0580027725.01|MsG0680034969.01|MsG0480021135.01|MsG0480021357.01|MsG0580025377.01|MsG0280009636.01|MsG0680034730.01|MsG0880045441.01|MsG0680034729.01|MsG0480022231.01|MsG0680031683.01|MsG0680034974.01|MsG0380012541.01|MsG0480021124.01|MsG0380012654.01|MsG0480021131.01|MsG0580025375.01|MsG0580026330.01|MsG0680031684.01|MsG0780040990.01	http://www.genome.jp/kegg-bin/show_pathway?map=map00999&multi_query=K01188+white,pink%0d%0aK21568+white,pink%0d%0aK22374+white,pink%0d%0aK23145+white,pink%0d%0aK00789+white,red%0d%0aK05349+white,blue%0d%0a	Biosynthesis of other secondary metabolites	Metabolism
16	Ubiquinone and other terpenoid-quinone biosynthesis	KEGG PATHWAY	map00130	16/1135	76/18577	1.13265e-05	0.000120472	MsG0180003114.01|MsG0880044675.01|MsG0480020728.01|MsG0580024209.01|MsG0880045101.01|MsG0880047488.01|MsG0580024256.01|MsG0180003504.01|MsG0780038349.01|MsG0580028603.01|MsG0880044676.01|MsG0580025738.01|MsG0580025389.01|MsG0880047492.01|MsG0180004177.01|MsG0480018132.01	http://www.genome.jp/kegg-bin/show_pathway?map=map00130&multi_query=K01661+white,red%0d%0aK06126+white,blue%0d%0aK23095+white,red%0d%0aK12501+white,red%0d%0aK12502+white,red%0d%0aK01904+white,pink%0d%0aK03809+white,blue%0d%0aK00487+white,blue%0d%0a	Metabolism of cofactors and vitamins	Metabolism
25	ABC transporters	KEGG PATHWAY	map02010	25/1135	168/18577	3.19709e-05	0.000311716	MsG0580025265.01|MsG0880046889.01|MsG0780040806.01|MsG0680035771.01|MsG0280011350.01|MsG0180004752.01|MsG0180003146.01|MsG0480018433.01|MsG0480023470.01|MsG0280011349.01|MsG0880047233.01|MsG0680031988.01|MsG0180004869.01|MsG0680035772.01|MsG0880042368.01|MsG0680034333.01|MsG0680034419.01|MsG0880047256.01|MsG0680030656.01|MsG0480021815.01|MsG0180004560.01|MsG0480022655.01|MsG0380011824.01|MsG08800…	http://www.genome.jp/kegg-bin/show_pathway?map=map02010&multi_query=K05681+white,pink%0d%0aK08711+white,blue%0d%0aK05666+white,pink%0d%0aK05658+white,blue%0d%0a	Membrane transport	Environmental Information Processing
33	MAPK signaling pathway - plant	KEGG PATHWAY	map04016	33/1135	260/18577	5.47073e-05	0.000492366	MsG0780041537.01|MsG0780039334.01|MsG0880047444.01|MsG0280007934.01|MsG0680034664.01|MsG0180003836.01|MsG0480023807.01|MsG0880047171.01|MsG0580025278.01|MsG0480020857.01|MsG0080048967.01|MsG0380014920.01|MsG0580028560.01|MsG0780039769.01|MsG0580027881.01|MsG0380015520.01|MsG0480023688.01|MsG0880042727.01|MsG0380016481.01|MsG0680031538.01|MsG0580029038.01|MsG0480018500.01|MsG0280006435.01|MsG01800…	http://www.genome.jp/kegg-bin/show_pathway?map=map04016&multi_query=K20718+white,red%0d%0aK14497+white,red%0d%0aK14496+white,blue%0d%0aK13424+white,blue%0d%0aK20772+white,blue%0d%0aK13426+white,blue%0d%0aK13416+white,blue%0d%0aK14498+white,blue%0d%0aK20725+white,blue%0d%0aK13449+white,blue%0d%0aK20604+white,blue%0d%0aK13447+white,pink%0d%0aK00940+white,red%0d%0aK20536+white,blue%0d%0aK14515+white…	Signal transduction	Environmental Information Processing
18	Arginine and proline metabolism	KEGG PATHWAY	map00330	18/1135	108/18577	9.07809e-05	0.000758669	MsG0780040428.01|MsG0480019187.01|MsG0880045668.01|MsG0780038866.01|MsG0280011063.01|MsG0380013491.01|MsG0480021060.01|MsG0480019185.01|MsG0880046573.01|MsG0680031116.01|MsG0380016360.01|MsG0380015175.01|MsG0180000576.01|MsG0380016507.01|MsG0380016359.01|MsG0380017898.01|MsG0480018921.01|MsG0780036812.01	http://www.genome.jp/kegg-bin/show_pathway?map=map00330&multi_query=K17839+white,pink%0d%0aK00286+white,red%0d%0aK00128+white,pink%0d%0aK00811+white,red%0d%0aK01476+white,red%0d%0aK01581+white,blue%0d%0aK00797+white,red%0d%0aK10536+white,blue%0d%0aK00318+white,blue%0d%0aK12657+white,red%0d%0a	Amino acid metabolism	Metabolism
18	Carbon fixation in photosynthetic organisms	KEGG PATHWAY	map00710	18/1135	109/18577	0.000102633	0.000800535	MsG0780041081.01|MsG0180006212.01|MsG0480021331.01|MsG0280010854.01|MsG0780041637.01|MsG0880045189.01|MsG0180003404.01|MsG0280007800.01|MsG0280009541.01|MsG0780040121.01|MsG0780041014.01|MsG0580025568.01|MsG0380017962.01|MsG0080049045.01|MsG0280010021.01|MsG0580025392.01|MsG0180001784.01|MsG0180004987.01	http://www.genome.jp/kegg-bin/show_pathway?map=map00710&multi_query=K00855+white,red%0d%0aK01803+white,red%0d%0aK00615+white,red%0d%0aK00051+white,red%0d%0aK01807+white,red%0d%0aK01595+white,pink%0d%0aK01623+white,pink%0d%0aK05298+white,red%0d%0aK00927+white,red%0d%0aK00025+white,red%0d%0aK01610+white,red%0d%0a	Energy metabolism	Metabolism
11	Linoleic acid metabolism	KEGG PATHWAY	map00591	11/1135	48/18577	0.000117435	0.00085874	MsG0880042625.01|MsG0780041556.01|MsG0780040405.01|MsG0880042750.01|MsG0880042641.01|MsG0480022935.01|MsG0880042441.01|MsG0580025193.01|MsG0880042645.01|MsG0880042650.01|MsG0380015883.01	http://www.genome.jp/kegg-bin/show_pathway?map=map00591&multi_query=K14674+white,blue%0d%0aK00454+white,pink%0d%0aK15718+white,pink%0d%0a	Lipid metabolism	Metabolism
23	Pyruvate metabolism	KEGG PATHWAY	map00620	23/1135	164/18577	0.000163193	0.00112315	MsG0480021060.01|MsG0580025568.01|MsG0280010021.01|MsG0780039304.01|MsG0880045668.01|MsG0280008498.01|MsG0880047656.01|MsG0280008554.01|MsG0880045189.01|MsG0680030950.01|MsG0380016360.01|MsG0180004987.01|MsG0780039842.01|MsG0280010854.01|MsG0380017651.01|MsG0480019997.01|MsG0280011063.01|MsG0580029511.01|MsG0380017016.01|MsG0080048636.01|MsG0380016359.01|MsG0180001784.01|MsG0380015870.01	http://www.genome.jp/kegg-bin/show_pathway?map=map00620&multi_query=K00002+white,red%0d%0aK00051+white,red%0d%0aK01759+white,red%0d%0aK00128+white,pink%0d%0aK01913+white,blue%0d%0aK01595+white,pink%0d%0aK01610+white,red%0d%0aK02160+white,red%0d%0aK01638+white,red%0d%0aK00025+white,red%0d%0aK00121+white,pink%0d%0a	Carbohydrate metabolism	Metabolism
12	Cutin, suberine and wax biosynthesis	KEGG PATHWAY	map00073	12/1135	61/18577	0.000273729	0.00177924	MsG0480023656.01|MsG0780040431.01|MsG0480023588.01|MsG0780040711.01|MsG0180005039.01|MsG0280010503.01|MsG0880042019.01|MsG0880043147.01|MsG0480020568.01|MsG0780040708.01|MsG0880044977.01|MsG0180001149.01	http://www.genome.jp/kegg-bin/show_pathway?map=map00073&multi_query=K17991+white,blue%0d%0aK13356+white,red%0d%0aK13407+white,blue%0d%0aK15404+white,red%0d%0aK15400+white,red%0d%0aK15398+white,red%0d%0aK21995+white,red%0d%0a	Lipid metabolism	Metabolism
24	Glycolysis / Gluconeogenesis	KEGG PATHWAY	map00010	24/1135	182/18577	0.000307025	0.00189063	MsG0780041081.01|MsG0480021331.01|MsG0280009541.01|MsG0480021060.01|MsG0580025568.01|MsG0780039304.01|MsG0880045668.01|MsG0880047605.01|MsG0180003404.01|MsG0780041014.01|MsG0080049045.01|MsG0280008498.01|MsG0280008554.01|MsG0880045189.01|MsG0180005516.01|MsG0380016360.01|MsG0380017016.01|MsG0480019997.01|MsG0280011063.01|MsG0680035567.01|MsG0580029511.01|MsG0180004951.01|MsG0380016359.01|MsG03800…	http://www.genome.jp/kegg-bin/show_pathway?map=map00010&multi_query=K00850+white,blue%0d%0aK00002+white,red%0d%0aK00131+white,red%0d%0aK01835+white,red%0d%0aK01803+white,red%0d%0aK00128+white,pink%0d%0aK01913+white,blue%0d%0aK01785+white,blue%0d%0aK01623+white,pink%0d%0aK01610+white,red%0d%0aK00927+white,red%0d%0aK00121+white,pink%0d%0a	Carbohydrate metabolism	Metabolism
13	beta-Alanine metabolism	KEGG PATHWAY	map00410	13/1135	71/18577	0.0003253	0.001903	MsG0380015175.01|MsG0880045668.01|MsG0580028896.01|MsG0880046942.01|MsG0280011063.01|MsG0380013491.01|MsG0480021060.01|MsG0880046071.01|MsG0180005622.01|MsG0380016360.01|MsG0680034766.01|MsG0380016359.01|MsG0880046945.01	http://www.genome.jp/kegg-bin/show_pathway?map=map00410&multi_query=K00128+white,pink%0d%0aK00276+white,pink%0d%0aK17839+white,pink%0d%0aK01580+white,red%0d%0a	Metabolism of other amino acids	Metabolism
12	Phenylalanine metabolism	KEGG PATHWAY	map00360	12/1135	63/18577	0.000374596	0.00208703	MsG0780040942.01|MsG0780040944.01|MsG0880046942.01|MsG0780040943.01|MsG0780040945.01|MsG0580030181.01|MsG0880046071.01|MsG0180005622.01|MsG0180003542.01|MsG0180000576.01|MsG0880043065.01|MsG0880046945.01	http://www.genome.jp/kegg-bin/show_pathway?map=map00360&multi_query=K00811+white,red%0d%0aK00276+white,pink%0d%0aK01593+white,red%0d%0aK10775+white,blue%0d%0a	Amino acid metabolism	Metabolism
16	Galactose metabolism	KEGG PATHWAY	map00052	16/1135	101/18577	0.000397407	0.00211348	MsG0180000436.01|MsG0680035567.01|MsG0580028893.01|MsG0180000437.01|MsG0580030022.01|MsG0780036467.01|MsG0780041477.01|MsG0880047419.01|MsG0180000438.01|MsG0280011165.01|MsG0880042591.01|MsG0180005516.01|MsG0880041965.01|MsG0580030055.01|MsG0180004951.01|MsG0880046816.01	http://www.genome.jp/kegg-bin/show_pathway?map=map00052&multi_query=K01193+white,pink%0d%0aK00850+white,blue%0d%0aK00963+white,red%0d%0aK01835+white,red%0d%0aK18819+white,red%0d%0aK01785+white,blue%0d%0aK07407+white,red%0d%0aK06617+white,blue%0d%0a	Carbohydrate metabolism	Metabolism
19	Glycerolipid metabolism	KEGG PATHWAY	map00561	19/1135	132/18577	0.000420453	0.00213882	MsG0280011063.01|MsG0880045668.01|MsG0780039186.01|MsG0780040405.01|MsG0880043148.01|MsG0780036467.01|MsG0180005917.01|MsG0880047419.01|MsG0880046846.01|MsG0480021060.01|MsG0680034677.01|MsG0380016360.01|MsG0480021218.01|MsG0380016359.01|MsG0180001364.01|MsG0780039179.01|MsG0880044570.01|MsG0780039304.01|MsG0180005959.01	http://www.genome.jp/kegg-bin/show_pathway?map=map00561&multi_query=K14674+white,blue%0d%0aK22848+white,red%0d%0aK00002+white,red%0d%0aK00901+white,blue%0d%0aK18693+white,blue%0d%0aK03715+white,blue%0d%0aK00128+white,pink%0d%0aK13508+white,red%0d%0aK01054+white,pink%0d%0aK07407+white,red%0d%0aK13513+white,red%0d%0aK06119+white,red%0d%0a	Lipid metabolism	Metabolism
5	Limonene and pinene degradation	KEGG PATHWAY	map00903	5/1135	13/18577	0.000718257	0.0035015	MsG0380016359.01|MsG0880045668.01|MsG0280011063.01|MsG0380016360.01|MsG0480021060.01	http://www.genome.jp/kegg-bin/show_pathway?map=map00903&multi_query=K00128+white,pink%0d%0a	Metabolism of terpenoids and polyketides	Metabolism
15	alpha-Linolenic acid metabolism	KEGG PATHWAY	map00592	15/1135	100/18577	0.00106753	0.00499603	MsG0580024171.01|MsG0580024176.01|MsG0380012400.01|MsG0580024178.01|MsG0680030615.01|MsG0680030613.01|MsG0780040405.01|MsG0180000197.01|MsG0580024170.01|MsG0880042750.01|MsG0480022935.01|MsG0480019593.01|MsG0480019525.01|MsG0380015883.01|MsG0480019594.01	http://www.genome.jp/kegg-bin/show_pathway?map=map00592&multi_query=K05894+white,blue%0d%0aK00454+white,pink%0d%0aK01723+white,blue%0d%0aK10529+white,pink%0d%0aK14674+white,blue%0d%0aK00224+white,blue%0d%0a	Lipid metabolism	Metabolism
13	Fatty acid degradation	KEGG PATHWAY	map00071	13/1135	82/18577	0.00134152	0.00603683	MsG0880045668.01|MsG0180001085.01|MsG0480019997.01|MsG0280011063.01|MsG0480021060.01|MsG0580029511.01|MsG0380017016.01|MsG0380016360.01|MsG0180001276.01|MsG0780036946.01|MsG0380016359.01|MsG0380015870.01|MsG0180004774.01	http://www.genome.jp/kegg-bin/show_pathway?map=map00071&multi_query=K00128+white,pink%0d%0aK01897+white,red%0d%0aK07517+white,blue%0d%0aK00121+white,pink%0d%0a	Lipid metabolism	Metabolism
4	Betalain biosynthesis	KEGG PATHWAY	map00965	4/1135	10/18577	0.00216128	0.00903107	MsG0880043065.01|MsG0180004328.01|MsG0180004203.01|MsG0680034290.01	http://www.genome.jp/kegg-bin/show_pathway?map=map00965&multi_query=K15777+white,blue%0d%0aK01593+white,red%0d%0a	Biosynthesis of other secondary metabolites	Metabolism
6	Histidine metabolism	KEGG PATHWAY	map00340	6/1135	23/18577	0.00210608	0.00912634	MsG0880045668.01|MsG0280006793.01|MsG0280011063.01|MsG0480021060.01|MsG0380016360.01|MsG0380016359.01	http://www.genome.jp/kegg-bin/show_pathway?map=map00340&multi_query=K00128+white,pink%0d%0aK01814+white,red%0d%0a	Amino acid metabolism	Metabolism
15	Ascorbate and aldarate metabolism	KEGG PATHWAY	map00053	15/1135	108/18577	0.00234262	0.00945126	MsG0880045668.01|MsG0480022232.01|MsG0880042495.01|MsG0380015271.01|MsG0580026328.01|MsG0380016362.01|MsG0580026645.01|MsG0580027887.01|MsG0180004493.01|MsG0380016360.01|MsG0580026644.01|MsG0380016359.01|MsG0480021060.01|MsG0780039304.01|MsG0280011063.01	http://www.genome.jp/kegg-bin/show_pathway?map=map00053&multi_query=K00002+white,red%0d%0aK00469+white,blue%0d%0aK00128+white,pink%0d%0aK21888+white,red%0d%0aK00012+white,red%0d%0aK10046+white,red%0d%0aK00434+white,red%0d%0a	Carbohydrate metabolism	Metabolism
10	Tyrosine metabolism	KEGG PATHWAY	map00350	10/1135	64/18577	0.00517919	0.0201988	MsG0880046942.01|MsG0480019997.01|MsG0880046071.01|MsG0180005622.01|MsG0580029511.01|MsG0380017016.01|MsG0180000576.01|MsG0880043065.01|MsG0880046945.01|MsG0380015870.01	http://www.genome.jp/kegg-bin/show_pathway?map=map00350&multi_query=K00811+white,red%0d%0aK00276+white,pink%0d%0aK01593+white,red%0d%0aK00121+white,pink%0d%0a	Amino acid metabolism	Metabolism
9	Phenylalanine, tyrosine and tryptophan biosynthesis	KEGG PATHWAY	map00400	9/1135	55/18577	0.00574614	0.021687	MsG0180005239.01|MsG0580027880.01|MsG0480020595.01|MsG0380015531.01|MsG0180000530.01|MsG0880047655.01|MsG0180000576.01|MsG0380014123.01|MsG0280010484.01	http://www.genome.jp/kegg-bin/show_pathway?map=map00400&multi_query=K01696+white,red%0d%0aK01736+white,blue%0d%0aK00811+white,red%0d%0aK01626+white,blue%0d%0aK01850+white,blue%0d%0aK05359+white,pink%0d%0aK15227+white,blue%0d%0a	Amino acid metabolism	Metabolism
7	Butanoate metabolism	KEGG PATHWAY	map00650	7/1135	39/18577	0.00858789	0.0313995	MsG0280008554.01|MsG0580028896.01|MsG0280009510.01|MsG0280011162.01|MsG0280008498.01|MsG0680034766.01|MsG0280011200.01	http://www.genome.jp/kegg-bin/show_pathway?map=map00650&multi_query=K01913+white,blue%0d%0aK18121+white,red%0d%0aK01580+white,red%0d%0aK17761+white,red%0d%0a	Carbohydrate metabolism	Metabolism
13	Cyanoamino acid metabolism	KEGG PATHWAY	map00460	13/1135	102/18577	0.00916426	0.0324915	MsG0680034969.01|MsG0480021135.01|MsG0580026330.01|MsG0380017168.01|MsG0480022231.01|MsG0680031683.01|MsG0680034974.01|MsG0380012541.01|MsG0480021124.01|MsG0380012654.01|MsG0480020491.01|MsG0480021131.01|MsG0680031684.01	http://www.genome.jp/kegg-bin/show_pathway?map=map00460&multi_query=K01188+white,pink%0d%0aK05349+white,blue%0d%0aK13035+white,blue%0d%0aK13051+white,blue%0d%0a	Metabolism of other amino acids	Metabolism
4	Monoterpenoid biosynthesis	KEGG PATHWAY	map00902	4/1135	15/18577	0.0109929	0.0357268	MsG0880043249.01|MsG0880043246.01|MsG0880043245.01|MsG0880043244.01	http://www.genome.jp/kegg-bin/show_pathway?map=map00902&multi_query=K15095+white,pink%0d%0a	Metabolism of terpenoids and polyketides	Metabolism
11	Fatty acid biosynthesis	KEGG PATHWAY	map00061	11/1135	82/18577	0.0109787	0.0377796	MsG0780039842.01|MsG0280011475.01|MsG0180001085.01|MsG0880047322.01|MsG0480022783.01|MsG0480022674.01|MsG0180005565.01|MsG0180001276.01|MsG0680030950.01|MsG0780038455.01|MsG0180004774.01	http://www.genome.jp/kegg-bin/show_pathway?map=map00061&multi_query=K02372+white,red%0d%0aK10782+white,red%0d%0aK00648+white,red%0d%0aK02160+white,red%0d%0aK01897+white,red%0d%0aK09458+white,red%0d%0a	Lipid metabolism	Metabolism
11	Pentose phosphate pathway	KEGG PATHWAY	map00030	11/1135	82/18577	0.0109787	0.0377796	MsG0780041081.01|MsG0480021331.01|MsG0780041637.01|MsG0780041474.01|MsG0880047605.01|MsG0180003404.01|MsG0280007800.01|MsG0180005516.01|MsG0080049045.01|MsG0180004951.01|MsG0180006212.01	http://www.genome.jp/kegg-bin/show_pathway?map=map00030&multi_query=K00850+white,blue%0d%0aK00131+white,red%0d%0aK01835+white,red%0d%0aK01807+white,red%0d%0aK01623+white,pink%0d%0aK00615+white,red%0d%0aK00036+white,red%0d%0a	Carbohydrate metabolism	Metabolism
6	Isoquinoline alkaloid biosynthesis	KEGG PATHWAY	map00950	6/1135	33/18577	0.0137292	0.043414	MsG0880046942.01|MsG0880046071.01|MsG0180005622.01|MsG0180000576.01|MsG0880043065.01|MsG0880046945.01	http://www.genome.jp/kegg-bin/show_pathway?map=map00950&multi_query=K00811+white,red%0d%0aK00276+white,pink%0d%0aK01593+white,red%0d%0a	Biosynthesis of other secondary metabolites	Metabolism
24	Amino sugar and nucleotide sugar metabolism	KEGG PATHWAY	map00520	24/1135	245/18577	0.0152946	0.0470913	MsG0580028893.01|MsG0280011136.01|MsG0880043920.01|MsG0480022232.01|MsG0580026328.01|MsG0780036638.01|MsG0180005764.01|MsG0280008352.01|MsG0880047055.01|MsG0280008349.01|MsG0480021150.01|MsG0380017684.01|MsG0480021267.01|MsG0380015844.01|MsG0180004493.01|MsG0380016036.01|MsG0180005516.01|MsG0480023755.01|MsG0180004312.01|MsG0380017786.01|MsG0580028982.01|MsG0180000751.01|MsG0380015899.01|MsG05800…	http://www.genome.jp/kegg-bin/show_pathway?map=map00520&multi_query=K01183+white,pink%0d%0aK00847+white,pink%0d%0aK00975+white,red%0d%0aK18677+white,red%0d%0aK00963+white,red%0d%0aK08678+white,red%0d%0aK15920+white,red%0d%0aK00966+white,red%0d%0aK01835+white,red%0d%0aK13379+white,red%0d%0aK12446+white,blue%0d%0aK00326+white,blue%0d%0aK00012+white,red%0d%0aK10046+white,red%0d%0a	Carbohydrate metabolism	Metabolism
38	Plant hormone signal transduction	KEGG PATHWAY	map04075	38/1135	434/18577	0.016428	0.049284	MsG0280009128.01|MsG0380017838.01|MsG0480021676.01|MsG0280006783.01|MsG0880047408.01|MsG0480020539.01|MsG0280007934.01|MsG0180003836.01|MsG0480023807.01|MsG0880043041.01|MsG0480022917.01|MsG0480023587.01|MsG0580027881.01|MsG0380015520.01|MsG0580030088.01|MsG0580029038.01|MsG0280006435.01|MsG0080048230.01|MsG0380016348.01|MsG0880046376.01|MsG0480018569.01|MsG0180004079.01|MsG0580027033.01|MsG08800…	http://www.genome.jp/kegg-bin/show_pathway?map=map04075&multi_query=K14486+white,red%0d%0aK14494+white,red%0d%0aK14497+white,red%0d%0aK14496+white,blue%0d%0aK14491+white,blue%0d%0aK14431+white,blue%0d%0aK14506+white,red%0d%0aK14492+white,blue%0d%0aK14484+white,blue%0d%0aK14488+white,pink%0d%0aK14489+white,red%0d%0aK13464+white,blue%0d%0aK14487+white,blue%0d%0aK14504+white,blue%0d%0aK13449+white,b…	Signal transduction	Environmental Information Processing
14	Glyoxylate and dicarboxylate metabolism	KEGG PATHWAY	map00630	14/1135	127/18577	0.0231221	0.0676323	MsG0280008554.01|MsG0580024643.01|MsG0680030463.01|MsG0280011200.01|MsG0880047661.01|MsG0180001784.01|MsG0280011162.01|MsG0580024678.01|MsG0480020295.01|MsG0080048636.01|MsG0680033159.01|MsG0280008498.01|MsG0380015217.01|MsG0180006042.01	http://www.genome.jp/kegg-bin/show_pathway?map=map00630&multi_query=K15893+white,red%0d%0aK15919+white,red%0d%0aK01913+white,blue%0d%0aK01915+white,blue%0d%0aK18121+white,red%0d%0aK00025+white,red%0d%0aK02437+white,red%0d%0aK00605+white,red%0d%0aK01638+white,red%0d%0aK01637+white,red%0d%0aK00122+white,red%0d%0aK22133+white,blue%0d%0a	Carbohydrate metabolism	Metabolism
8	Arginine biosynthesis	KEGG PATHWAY	map00220	8/1135	59/18577	0.0263266	0.075127	MsG0480019187.01|MsG0180000600.01|MsG0880046102.01|MsG0680031695.01|MsG0180001573.01|MsG0180000576.01|MsG0480019185.01|MsG0380015217.01	http://www.genome.jp/kegg-bin/show_pathway?map=map00220&multi_query=K00261+white,blue%0d%0aK00145+white,red%0d%0aK00811+white,red%0d%0aK01476+white,red%0d%0aK01915+white,blue%0d%0aK14677+white,red%0d%0a	Amino acid metabolism	Metabolism
11	Fructose and mannose metabolism	KEGG PATHWAY	map00051	11/1135	95/18577	0.0300465	0.0837009	MsG0780041081.01|MsG0480021150.01|MsG0480021331.01|MsG0380015844.01|MsG0180003404.01|MsG0480019898.01|MsG0780041014.01|MsG0180004951.01|MsG0080049045.01|MsG0580028982.01|MsG0180004312.01	http://www.genome.jp/kegg-bin/show_pathway?map=map00051&multi_query=K00966+white,red%0d%0aK00847+white,pink%0d%0aK01803+white,red%0d%0aK01623+white,pink%0d%0aK19355+white,blue%0d%0aK00850+white,blue%0d%0a	Carbohydrate metabolism	Metabolism
7	Carotenoid biosynthesis	KEGG PATHWAY	map00906	7/1135	50/18577	0.0313051	0.0851791	MsG0180004504.01|MsG0580025259.01|MsG0280009781.01|MsG0580025256.01|MsG0580028723.01|MsG0580028853.01|MsG0880045477.01	http://www.genome.jp/kegg-bin/show_pathway?map=map00906&multi_query=K02291+white,red%0d%0aK09840+white,red%0d%0aK00514+white,red%0d%0aK09843+white,blue%0d%0a	Metabolism of terpenoids and polyketides	Metabolism
10	Alanine, aspartate and glutamate metabolism	KEGG PATHWAY	map00250	10/1135	87/18577	0.03915	0.104103	MsG0480018180.01|MsG0580028896.01|MsG0280009510.01|MsG0580028450.01|MsG0380017168.01|MsG0880046102.01|MsG0680031695.01|MsG0180000576.01|MsG0680034766.01|MsG0380015217.01	http://www.genome.jp/kegg-bin/show_pathway?map=map00250&multi_query=K00261+white,blue%0d%0aK17761+white,red%0d%0aK01953+white,pink%0d%0aK13051+white,blue%0d%0aK00811+white,red%0d%0aK01580+white,red%0d%0aK01915+white,blue%0d%0a	Amino acid metabolism	Metabolism
8	Pantothenate and CoA biosynthesis	KEGG PATHWAY	map00770	8/1135	66/18577	0.0471285	0.122534	MsG0380015175.01|MsG0880045668.01|MsG0280011063.01|MsG0380013491.01|MsG0480021060.01|MsG0380016360.01|MsG0380016359.01|MsG0780041287.01	http://www.genome.jp/kegg-bin/show_pathway?map=map00770&multi_query=K00128+white,pink%0d%0aK17839+white,pink%0d%0aK00859+white,blue%0d%0a	Metabolism of cofactors and vitamins	Metabolism
6	Folate biosynthesis	KEGG PATHWAY	map00790	6/1135	44/18577	0.0498072	0.126683	MsG0080048312.01|MsG0880042541.01|MsG0280006476.01|MsG0580029412.01|MsG0280009992.01|MsG0480022299.01	http://www.genome.jp/kegg-bin/show_pathway?map=map00790&multi_query=K01113+white,blue%0d%0aK00079+white,blue%0d%0aK01307+white,blue%0d%0aK14652+white,blue%0d%0aK01495+white,blue%0d%0a	Metabolism of cofactors and vitamins	Metabolism
6	Nitrogen metabolism	KEGG PATHWAY	map00910	6/1135	46/18577	0.0597208	0.148667	MsG0480020754.01|MsG0480020755.01|MsG0880046102.01|MsG0680031695.01|MsG0180003350.01|MsG0380015217.01	http://www.genome.jp/kegg-bin/show_pathway?map=map00910&multi_query=K00261+white,blue%0d%0aK01915+white,blue%0d%0aK02575+white,blue%0d%0aK01674+white,red%0d%0a	Energy metabolism	Metabolism
4	Biotin metabolism	KEGG PATHWAY	map00780	4/1135	25/18577	0.0629492	0.153439	MsG0880047322.01|MsG0480022783.01|MsG0180005565.01|MsG0480022674.01	http://www.genome.jp/kegg-bin/show_pathway?map=map00780&multi_query=K02372+white,red%0d%0aK09458+white,red%0d%0a	Metabolism of cofactors and vitamins	Metabolism
4	Thiamine metabolism	KEGG PATHWAY	map00730	4/1135	26/18577	0.0709478	0.169406	MsG0880045229.01|MsG0180005666.01|MsG0380014728.01|MsG0180001917.01	http://www.genome.jp/kegg-bin/show_pathway?map=map00730&multi_query=K00878+white,red%0d%0aK03147+white,red%0d%0aK03146+white,red%0d%0aK01662+white,blue%0d%0a	Metabolism of cofactors and vitamins	Metabolism
13	Purine metabolism	KEGG PATHWAY	map00230	13/1135	137/18577	0.0760125	0.177869	MsG0580024735.01|MsG0280006695.01|MsG0580027083.01|MsG0280011054.01|MsG0780041331.01|MsG0480023688.01|MsG0180005516.01|MsG0780040519.01|MsG0880042743.01|MsG0780040139.01|MsG0780040021.01|MsG0780040022.01|MsG0780040138.01	http://www.genome.jp/kegg-bin/show_pathway?map=map00230&multi_query=K07023+white,red%0d%0aK01835+white,red%0d%0aK00106+white,blue%0d%0aK01466+white,red%0d%0aK00942+white,blue%0d%0aK00860+white,blue%0d%0aK00951+white,pink%0d%0aK14641+white,pink%0d%0aK00940+white,red%0d%0a	Nucleotide metabolism	Metabolism
10	Pyrimidine metabolism	KEGG PATHWAY	map00240	10/1135	104/18577	0.103056	0.236423	MsG0580027083.01|MsG0880045368.01|MsG0480018920.01|MsG0480023688.01|MsG0880045384.01|MsG0780040139.01|MsG0780040021.01|MsG0780040022.01|MsG0880046230.01|MsG0780040138.01	http://www.genome.jp/kegg-bin/show_pathway?map=map00240&multi_query=K07023+white,red%0d%0aK00761+white,red%0d%0aK14641+white,pink%0d%0aK00940+white,red%0d%0aK01937+white,blue%0d%0aK00876+white,red%0d%0a	Nucleotide metabolism	Metabolism
9	Tryptophan metabolism	KEGG PATHWAY	map00380	9/1135	92/18577	0.108888	0.244999	MsG0880045668.01|MsG0480020076.01|MsG0280011063.01|MsG0480021060.01|MsG0480020072.01|MsG0380016360.01|MsG0380016112.01|MsG0880043065.01|MsG0380016359.01	http://www.genome.jp/kegg-bin/show_pathway?map=map00380&multi_query=K00128+white,pink%0d%0aK22588+white,pink%0d%0aK01593+white,red%0d%0a	Amino acid metabolism	Metabolism
1	Glycosphingolipid biosynthesis - lacto and neolacto series	KEGG PATHWAY	map00601	1/1135	2/18577	0.118464	0.261516	MsG0780039190.01	http://www.genome.jp/kegg-bin/show_pathway?map=map00601&multi_query=K01988+white,blue%0d%0a	Glycan biosynthesis and metabolism	Metabolism
3	Glycosphingolipid biosynthesis - globo and isoglobo series	KEGG PATHWAY	map00603	3/1135	23/18577	0.162949	0.353056	MsG0780039190.01|MsG0880047419.01|MsG0780036467.01	http://www.genome.jp/kegg-bin/show_pathway?map=map00603&multi_query=K07407+white,red%0d%0aK01988+white,blue%0d%0a	Glycan biosynthesis and metabolism	Metabolism
11	Peroxisome	KEGG PATHWAY	map04146	11/1135	133/18577	0.18994	0.404053	MsG0480020691.01|MsG0180001085.01|MsG0280011054.01|MsG0380017554.01|MsG0180002545.01|MsG0280010503.01|MsG0480020568.01|MsG0480020705.01|MsG0180001276.01|MsG0480021912.01|MsG0180004774.01	http://www.genome.jp/kegg-bin/show_pathway?map=map04146&multi_query=K13348+white,red%0d%0aK13356+white,red%0d%0aK00106+white,blue%0d%0aK00306+white,blue%0d%0aK04564+white,red%0d%0aK04565+white,red%0d%0aK01897+white,red%0d%0a	Transport and catabolism	Cellular Processes
5	Diterpenoid biosynthesis	KEGG PATHWAY	map00904	5/1135	52/18577	0.210358	0.41715	MsG0280009804.01|MsG0180004772.01|MsG0280007779.01|MsG0280011347.01|MsG0480022793.01	http://www.genome.jp/kegg-bin/show_pathway?map=map00904&multi_query=K04124+white,red%0d%0aK04125+white,blue%0d%0aK04123+white,blue%0d%0a	Metabolism of terpenoids and polyketides	Metabolism
10	Glycine, serine and threonine metabolism	KEGG PATHWAY	map00260	10/1135	121/18577	0.205054	0.428417	MsG0580024643.01|MsG0880046942.01|MsG0180005622.01|MsG0880047661.01|MsG0380017554.01|MsG0580024678.01|MsG0880046071.01|MsG0380014123.01|MsG0880046945.01|MsG0180006042.01	http://www.genome.jp/kegg-bin/show_pathway?map=map00260&multi_query=K15893+white,red%0d%0aK00276+white,pink%0d%0aK15919+white,red%0d%0aK00306+white,blue%0d%0aK01696+white,red%0d%0aK02437+white,red%0d%0aK00605+white,red%0d%0a	Amino acid metabolism	Metabolism
3	Vitamin B6 metabolism	KEGG PATHWAY	map00750	3/1135	26/18577	0.210091	0.431239	MsG0280011229.01|MsG0280011228.01|MsG0780036221.01	http://www.genome.jp/kegg-bin/show_pathway?map=map00750&multi_query=K13248+white,blue%0d%0a	Metabolism of cofactors and vitamins	Metabolism
3	Stilbenoid, diarylheptanoid and gingerol biosynthesis	KEGG PATHWAY	map00945	3/1135	26/18577	0.210091	0.431239	MsG0880045634.01|MsG0880045912.01|MsG0580028603.01	http://www.genome.jp/kegg-bin/show_pathway?map=map00945&multi_query=K00487+white,blue%0d%0aK00588+white,blue%0d%0aK13065+white,red%0d%0a	Biosynthesis of other secondary metabolites	Metabolism
6	Lysine degradation	KEGG PATHWAY	map00310	6/1135	67/18577	0.224671	0.438108	MsG0880045668.01|MsG0280011063.01|MsG0380017554.01|MsG0480021060.01|MsG0380016360.01|MsG0380016359.01	http://www.genome.jp/kegg-bin/show_pathway?map=map00310&multi_query=K00128+white,pink%0d%0aK00306+white,blue%0d%0a	Amino acid metabolism	Metabolism
3	Riboflavin metabolism	KEGG PATHWAY	map00740	3/1135	28/18577	0.242984	0.466051	MsG0080048312.01|MsG0280006476.01|MsG0180001917.01	http://www.genome.jp/kegg-bin/show_pathway?map=map00740&multi_query=K00878+white,red%0d%0aK14652+white,blue%0d%0a	Metabolism of cofactors and vitamins	Metabolism
12	Glycerophospholipid metabolism	KEGG PATHWAY	map00564	12/1135	158/18577	0.259149	0.489039	MsG0880044570.01|MsG0180005414.01|MsG0780039186.01|MsG0180005412.01|MsG0480021808.01|MsG0880043148.01|MsG0780040005.01|MsG0480021218.01|MsG0180005917.01|MsG0780040405.01|MsG0380012063.01|MsG0380017894.01	http://www.genome.jp/kegg-bin/show_pathway?map=map00564&multi_query=K25193+white,red%0d%0aK18696+white,blue%0d%0aK18693+white,blue%0d%0aK01115+white,blue%0d%0aK13508+white,red%0d%0aK14156+white,red%0d%0aK00901+white,blue%0d%0aK14674+white,blue%0d%0aK13513+white,red%0d%0a	Lipid metabolism	Metabolism
1	Exopolysaccharide biosynthesis	KEGG PATHWAY	map00543	1/1135	5/18577	0.270394	0.502161	MsG0580029950.01	http://www.genome.jp/kegg-bin/show_pathway?map=map00543&multi_query=K00640+white,blue%0d%0a	Glycan biosynthesis and metabolism	Metabolism
1	Indole alkaloid biosynthesis	KEGG PATHWAY	map00901	1/1135	5/18577	0.270394	0.502161	MsG0880043065.01	http://www.genome.jp/kegg-bin/show_pathway?map=map00901&multi_query=K01593+white,red%0d%0a	Biosynthesis of other secondary metabolites	Metabolism
1	Caffeine metabolism	KEGG PATHWAY	map00232	1/1135	5/18577	0.270394	0.502161	MsG0280011054.01	http://www.genome.jp/kegg-bin/show_pathway?map=map00232&multi_query=K00106+white,blue%0d%0a	Biosynthesis of other secondary metabolites	Metabolism
11	Photosynthesis	KEGG PATHWAY	map00195	11/1135	159/18577	0.379908	0.634988	MsG0580024140.01|MsG0580024875.01|MsG0580029657.01|MsG0080048694.01|MsG0480023187.01|MsG0780036909.01|MsG0280006336.01|MsG0080047955.01|MsG0280010353.01|MsG0380014029.01|MsG0280010704.01	http://www.genome.jp/kegg-bin/show_pathway?map=map00195&multi_query=K02698+white,red%0d%0aK02703+white,blue%0d%0aK02717+white,red%0d%0aK02716+white,red%0d%0aK02639+white,red%0d%0aK08902+white,red%0d%0aK08901+white,red%0d%0a	Energy metabolism	Metabolism
2	Photosynthesis - antenna proteins	KEGG PATHWAY	map00196	2/1135	21/18577	0.370328	0.637181	MsG0680030760.01|MsG0680030759.01	http://www.genome.jp/kegg-bin/show_pathway?map=map00196&multi_query=K08912+white,red%0d%0a	Energy metabolism	Metabolism
5	Sphingolipid metabolism	KEGG PATHWAY	map00600	5/1135	65/18577	0.365281	0.637879	MsG0780036876.01|MsG0880047419.01|MsG0380015869.01|MsG0780036467.01|MsG0580026143.01	http://www.genome.jp/kegg-bin/show_pathway?map=map00600&multi_query=K04713+white,blue%0d%0aK07407+white,red%0d%0aK01634+white,blue%0d%0aK12349+white,red%0d%0a	Lipid metabolism	Metabolism
8	Inositol phosphate metabolism	KEGG PATHWAY	map00562	8/1135	112/18577	0.376987	0.639238	MsG0880042495.01|MsG0480022947.01|MsG0480023344.01|MsG0580026645.01|MsG0880046067.01|MsG0880042808.01|MsG0780041014.01|MsG0580026644.01	http://www.genome.jp/kegg-bin/show_pathway?map=map00562&multi_query=K01803+white,red%0d%0aK24221+white,blue%0d%0aK01858+white,red%0d%0aK00889+white,red%0d%0aK00469+white,blue%0d%0aK22913+white,blue%0d%0a	Carbohydrate metabolism	Metabolism
3	Taurine and hypotaurine metabolism	KEGG PATHWAY	map00430	3/1135	35/18577	0.361856	0.641473	MsG0680034766.01|MsG0580028896.01|MsG0280008553.01	http://www.genome.jp/kegg-bin/show_pathway?map=map00430&multi_query=K01580+white,red%0d%0aK00485+white,blue%0d%0a	Metabolism of other amino acids	Metabolism
2	Arachidonic acid metabolism	KEGG PATHWAY	map00590	2/1135	24/18577	0.435892	0.718301	MsG0780040405.01|MsG0480022299.01	http://www.genome.jp/kegg-bin/show_pathway?map=map00590&multi_query=K14674+white,blue%0d%0aK00079+white,blue%0d%0a	Lipid metabolism	Metabolism
8	Phosphatidylinositol signaling system	KEGG PATHWAY	map04070	8/1135	119/18577	0.442869	0.719663	MsG0880047171.01|MsG0580025278.01|MsG0480022947.01|MsG0880047444.01|MsG0880044570.01|MsG0680030719.01|MsG0780036291.01|MsG0680031538.01	http://www.genome.jp/kegg-bin/show_pathway?map=map04070&multi_query=K13024+white,blue%0d%0aK02183+white,blue%0d%0aK00889+white,red%0d%0aK00901+white,blue%0d%0a	Signal transduction	Environmental Information Processing
1	C5-Branched dibasic acid metabolism	KEGG PATHWAY	map00660	1/1135	10/18577	0.467722	0.729646	MsG0280011445.01	http://www.genome.jp/kegg-bin/show_pathway?map=map00660&multi_query=K00052+white,red%0d%0a	Carbohydrate metabolism	Metabolism
3	Nicotinate and nicotinamide metabolism	KEGG PATHWAY	map00760	3/1135	41/18577	0.461659	0.729921	MsG0880046281.01|MsG0180004734.01|MsG0180004732.01	http://www.genome.jp/kegg-bin/show_pathway?map=map00760&multi_query=K18551+white,blue%0d%0aK03517+white,red%0d%0a	Metabolism of cofactors and vitamins	Metabolism
2	Monobactam biosynthesis	KEGG PATHWAY	map00261	2/1135	25/18577	0.456923	0.732328	MsG0880043457.01|MsG0880043456.01	http://www.genome.jp/kegg-bin/show_pathway?map=map00261&multi_query=K01714+white,red%0d%0a	Biosynthesis of other secondary metabolites	Metabolism
2	Lysine biosynthesis	KEGG PATHWAY	map00300	2/1135	26/18577	0.477492	0.735087	MsG0880043457.01|MsG0880043456.01	http://www.genome.jp/kegg-bin/show_pathway?map=map00300&multi_query=K01714+white,red%0d%0a	Amino acid metabolism	Metabolism
5	Valine, leucine and isoleucine degradation	KEGG PATHWAY	map00280	5/1135	78/18577	0.522161	0.773327	MsG0280011063.01|MsG0380016359.01|MsG0880045668.01|MsG0380016360.01|MsG0480021060.01	http://www.genome.jp/kegg-bin/show_pathway?map=map00280&multi_query=K00128+white,pink%0d%0a	Amino acid metabolism	Metabolism
11	Cysteine and methionine metabolism	KEGG PATHWAY	map00270	11/1135	177/18577	0.521322	0.781983	MsG0580029950.01|MsG0180005586.01|MsG0780039769.01|MsG0180001784.01|MsG0580029389.01|MsG0780040660.01|MsG0780040990.01|MsG0180000576.01|MsG0380016507.01|MsG0380016393.01|MsG0180004515.01	http://www.genome.jp/kegg-bin/show_pathway?map=map00270&multi_query=K05933+white,pink%0d%0aK00547+white,pink%0d%0aK00640+white,blue%0d%0aK20772+white,blue%0d%0aK00025+white,red%0d%0aK00811+white,red%0d%0aK00797+white,red%0d%0aK00789+white,red%0d%0aK01738+white,blue%0d%0a	Amino acid metabolism	Metabolism
4	SNARE interactions in vesicular transport	KEGG PATHWAY	map04130	4/1135	61/18577	0.516449	0.784734	MsG0780041198.01|MsG0380013070.01|MsG0180003240.01|MsG0180003241.01	http://www.genome.jp/kegg-bin/show_pathway?map=map04130&multi_query=K08486+white,blue%0d%0aK08493+white,red%0d%0a	Folding, sorting and degradation	Genetic Information Processing
3	Sulfur metabolism	KEGG PATHWAY	map00920	3/1135	49/18577	0.58274	0.852258	MsG0580029950.01|MsG0180004515.01|MsG0580024735.01	http://www.genome.jp/kegg-bin/show_pathway?map=map00920&multi_query=K00860+white,blue%0d%0aK00640+white,blue%0d%0aK01738+white,blue%0d%0a	Energy metabolism	Metabolism
3	Steroid biosynthesis	KEGG PATHWAY	map00100	3/1135	50/18577	0.596615	0.861777	MsG0680035881.01|MsG0780040405.01|MsG0480021486.01	http://www.genome.jp/kegg-bin/show_pathway?map=map00100&multi_query=K01853+white,blue%0d%0aK14674+white,blue%0d%0aK09828+white,red%0d%0a	Lipid metabolism	Metabolism
2	Other glycan degradation	KEGG PATHWAY	map00511	2/1135	36/18577	0.654789	0.934272	MsG0880045616.01|MsG0180005790.01	http://www.genome.jp/kegg-bin/show_pathway?map=map00511&multi_query=K01191+white,red%0d%0aK15923+white,red%0d%0a	Glycan biosynthesis and metabolism	Metabolism
4	Sesquiterpenoid and triterpenoid biosynthesis	KEGG PATHWAY	map00909	4/1135	74/18577	0.669809	0.944189	MsG0880042578.01|MsG0480018096.01|MsG0780037642.01|MsG0480018092.01	http://www.genome.jp/kegg-bin/show_pathway?map=map00909&multi_query=K20658+white,red%0d%0aK15813+white,pink%0d%0a	Metabolism of terpenoids and polyketides	Metabolism
6	Phagosome	KEGG PATHWAY	map04145	6/1135	116/18577	0.719304	0.990101	MsG0780040472.01|MsG0380017858.01|MsG0780039847.01|MsG0780040365.01|MsG0580026742.01|MsG0180005741.01	http://www.genome.jp/kegg-bin/show_pathway?map=map04145&multi_query=K08057+white,pink%0d%0aK07374+white,red%0d%0aK07375+white,red%0d%0a	Transport and catabolism	Cellular Processes
1	Brassinosteroid biosynthesis	KEGG PATHWAY	map00905	1/1135	20/18577	0.716779	0.998371	MsG0880042748.01	http://www.genome.jp/kegg-bin/show_pathway?map=map00905&multi_query=K20623+white,blue%0d%0a	Metabolism of terpenoids and polyketides	Metabolism
7	Spliceosome	KEGG PATHWAY	map03040	7/1135	425/18577	0.999999	0.999999	MsG0780041370.01|MsG0380014125.01|MsG0680031848.01|MsG0880047581.01|MsG0280006307.01|MsG0380012110.01|MsG0280009424.01	http://www.genome.jp/kegg-bin/show_pathway?map=map03040&multi_query=K12835+white,blue%0d%0aK12741+white,red%0d%0aK12843+white,blue%0d%0aK03283+white,pink%0d%0a	Transcription	Genetic Information Processing
2	Ether lipid metabolism	KEGG PATHWAY	map00565	2/1135	42/18577	0.73602	1	MsG0780040405.01|MsG0380017894.01	http://www.genome.jp/kegg-bin/show_pathway?map=map00565&multi_query=K14674+white,blue%0d%0aK01115+white,blue%0d%0a	Lipid metabolism	Metabolism
2	Various types of N-glycan biosynthesis	KEGG PATHWAY	map00513	2/1135	45/18577	0.770151	1	MsG0580025498.01|MsG0580025500.01	http://www.genome.jp/kegg-bin/show_pathway?map=map00513&multi_query=K07441+white,blue%0d%0a	Glycan biosynthesis and metabolism	Metabolism
1	Valine, leucine and isoleucine biosynthesis	KEGG PATHWAY	map00290	1/1135	25/18577	0.793433	1	MsG0280011445.01	http://www.genome.jp/kegg-bin/show_pathway?map=map00290&multi_query=K00052+white,red%0d%0a	Amino acid metabolism	Metabolism
1	Glycosaminoglycan degradation	KEGG PATHWAY	map00531	1/1135	29/18577	0.839534	1	MsG0780036008.01	http://www.genome.jp/kegg-bin/show_pathway?map=map00531&multi_query=K10532+white,red%0d%0a	Glycan biosynthesis and metabolism	Metabolism
3	Citrate cycle (TCA cycle)	KEGG PATHWAY	map00020	3/1135	75/18577	0.844654	1	MsG0580025568.01|MsG0180001784.01|MsG0880045189.01	http://www.genome.jp/kegg-bin/show_pathway?map=map00020&multi_query=K00025+white,red%0d%0aK01610+white,red%0d%0a	Carbohydrate metabolism	Metabolism
2	Propanoate metabolism	KEGG PATHWAY	map00640	2/1135	55/18577	0.857538	1	MsG0780039842.01|MsG0680030950.01	http://www.genome.jp/kegg-bin/show_pathway?map=map00640&multi_query=K02160+white,red%0d%0a	Carbohydrate metabolism	Metabolism
1	Flavone and flavonol biosynthesis	KEGG PATHWAY	map00944	1/1135	34/18577	0.882983	1	MsG0680030960.01	http://www.genome.jp/kegg-bin/show_pathway?map=map00944&multi_query=K13264+white,blue%0d%0a	Biosynthesis of other secondary metabolites	Metabolism
1	One carbon pool by folate	KEGG PATHWAY	map00670	1/1135	34/18577	0.882983	1	MsG0880047661.01	http://www.genome.jp/kegg-bin/show_pathway?map=map00670&multi_query=K00605+white,red%0d%0a	Metabolism of cofactors and vitamins	Metabolism
2	Fatty acid elongation	KEGG PATHWAY	map00062	2/1135	61/18577	0.894178	1	MsG0480020582.01|MsG0680034760.01	http://www.genome.jp/kegg-bin/show_pathway?map=map00062&multi_query=K15397+white,pink%0d%0a	Lipid metabolism	Metabolism
2	N-Glycan biosynthesis	KEGG PATHWAY	map00510	2/1135	64/18577	0.909017	1	MsG0580025498.01|MsG0580025500.01	http://www.genome.jp/kegg-bin/show_pathway?map=map00510&multi_query=K07441+white,blue%0d%0a	Glycan biosynthesis and metabolism	Metabolism
1	Zeatin biosynthesis	KEGG PATHWAY	map00908	1/1135	40/18577	0.919899	1	MsG0180001050.01	http://www.genome.jp/kegg-bin/show_pathway?map=map00908&multi_query=K13495+white,blue%0d%0a	Metabolism of terpenoids and polyketides	Metabolism
11	Pentose and glucuronate interconversions	KEGG PATHWAY	map00040	11/1135	268/18577	0.941573	1	MsG0580028893.01|MsG0480022232.01|MsG0780038307.01|MsG0580026328.01|MsG0880041983.01|MsG0780041316.01|MsG0480019217.01|MsG0380016245.01|MsG0780041327.01|MsG0880045766.01|MsG0780039304.01	http://www.genome.jp/kegg-bin/show_pathway?map=map00040&multi_query=K01184+white,blue%0d%0aK00963+white,red%0d%0aK01051+white,pink%0d%0aK00012+white,red%0d%0aK01728+white,pink%0d%0aK00002+white,red%0d%0a	Carbohydrate metabolism	Metabolism
1	Autophagy - other	KEGG PATHWAY	map04136	1/1135	46/18577	0.945175	1	MsG0880047229.01	http://www.genome.jp/kegg-bin/show_pathway?map=map04136&multi_query=K08341+white,blue%0d%0a	Transport and catabolism	Cellular Processes
2	Terpenoid backbone biosynthesis	KEGG PATHWAY	map00900	2/1135	76/18577	0.950957	1	MsG0880045229.01|MsG0480022890.01	http://www.genome.jp/kegg-bin/show_pathway?map=map00900&multi_query=K13789+white,red%0d%0aK01662+white,blue%0d%0a	Metabolism of terpenoids and polyketides	Metabolism
2	Protein export	KEGG PATHWAY	map03060	2/1135	80/18577	0.960254	1	MsG0180004492.01|MsG0480022260.01	http://www.genome.jp/kegg-bin/show_pathway?map=map03060&multi_query=K03106+white,red%0d%0aK03116+white,red%0d%0a	Folding, sorting and degradation	Genetic Information Processing
1	Biosynthesis of unsaturated fatty acids	KEGG PATHWAY	map01040	1/1135	57/18577	0.972651	1	MsG0780040579.01	http://www.genome.jp/kegg-bin/show_pathway?map=map01040&multi_query=K10256+white,red%0d%0a	Lipid metabolism	Metabolism
24	Ribosome	KEGG PATHWAY	map03010	24/1135	554/18577	0.9736	1	MsG0280006870.01|MsG0480020690.01|MsG0280007831.01|MsG0480021682.01|MsG0880044003.01|MsG0480023314.01|MsG0380015971.01|MsG0280011299.01|MsG0580024139.01|MsG0180005361.01|MsG0080049068.01|MsG0180005961.01|MsG0180003729.01|MsG0380014470.01|MsG0380018066.01|MsG0780040884.01|MsG0080048497.01|MsG0380015081.01|MsG0880044339.01|MsG0280008591.01|MsG0180005291.01|MsG0080049039.01|MsG0480019484.01|MsG01800…	http://www.genome.jp/kegg-bin/show_pathway?map=map03010&multi_query=K02914+white,blue%0d%0aK02876+white,red%0d%0aK02926+white,red%0d%0aK02888+white,red%0d%0aK02871+white,red%0d%0aK02939+white,red%0d%0aK02906+white,red%0d%0aK02868+white,blue%0d%0aK02881+white,pink%0d%0aK02879+white,red%0d%0aK02959+white,red%0d%0aK02882+white,red%0d%0aK02904+white,red%0d%0aK02997+white,red%0d%0aK02890+white,red%0d%…	Translation	Genetic Information Processing
1	Mismatch repair	KEGG PATHWAY	map03430	1/1135	59/18577	0.9759	1	MsG0180005940.01	http://www.genome.jp/kegg-bin/show_pathway?map=map03430&multi_query=K07466+white,red%0d%0a	Replication and repair	Genetic Information Processing
1	Base excision repair	KEGG PATHWAY	map03410	1/1135	65/18577	0.983512	1	MsG0480020545.01	http://www.genome.jp/kegg-bin/show_pathway?map=map03410&multi_query=K10798+white,red%0d%0a	Replication and repair	Genetic Information Processing
2	Nucleotide excision repair	KEGG PATHWAY	map03420	2/1135	98/18577	0.98488	1	MsG0180005940.01|MsG0080048388.01	http://www.genome.jp/kegg-bin/show_pathway?map=map03420&multi_query=K07466+white,red%0d%0aK10610+white,red%0d%0a	Replication and repair	Genetic Information Processing
8	Oxidative phosphorylation	KEGG PATHWAY	map00190	8/1135	255/18577	0.989482	1	MsG0480022486.01|MsG0180003689.01|MsG0280008226.01|MsG0080049160.01|MsG0880046405.01|MsG0480022509.01|MsG0580028442.01|MsG0180003670.01	http://www.genome.jp/kegg-bin/show_pathway?map=map00190&multi_query=K01507+white,blue%0d%0aK02132+white,blue%0d%0aK01535+white,pink%0d%0aK03885+white,blue%0d%0a	Energy metabolism	Metabolism
3	Ribosome biogenesis in eukaryotes	KEGG PATHWAY	map03008	3/1135	141/18577	0.992984	1	MsG0180006065.01|MsG0280006639.01|MsG0880042663.01	http://www.genome.jp/kegg-bin/show_pathway?map=map03008&multi_query=K14572+white,blue%0d%0aK14568+white,red%0d%0aK14553+white,red%0d%0a	Translation	Genetic Information Processing
2	Homologous recombination	KEGG PATHWAY	map03440	2/1135	116/18577	0.994399	1	MsG0880047438.01|MsG0180005940.01	http://www.genome.jp/kegg-bin/show_pathway?map=map03440&multi_query=K07466+white,red%0d%0aK04728+white,red%0d%0a	Replication and repair	Genetic Information Processing
1	DNA replication	KEGG PATHWAY	map03030	1/1135	85/18577	0.995352	1	MsG0180005940.01	http://www.genome.jp/kegg-bin/show_pathway?map=map03030&multi_query=K07466+white,red%0d%0a	Replication and repair	Genetic Information Processing
3	Aminoacyl-tRNA biosynthesis	KEGG PATHWAY	map00970	3/1135	151/18577	0.995792	1	MsG0580027394.01|MsG0380018069.01|MsG0780040972.01	http://www.genome.jp/kegg-bin/show_pathway?map=map00970&multi_query=K02434+white,red%0d%0aK01872+white,red%0d%0aK01892+white,red%0d%0a	Translation	Genetic Information Processing
16	Protein processing in endoplasmic reticulum	KEGG PATHWAY	map04141	16/1135	495/18577	0.998825	1	MsG0180004426.01|MsG0480022348.01|MsG0280007225.01|MsG0480022342.01|MsG0780039847.01|MsG0280008719.01|MsG0280010728.01|MsG0280006307.01|MsG0880047143.01|MsG0680031848.01|MsG0580026742.01|MsG0480022344.01|MsG0880047581.01|MsG0480022532.01|MsG0480022345.01|MsG0380014194.01	http://www.genome.jp/kegg-bin/show_pathway?map=map04141&multi_query=K08057+white,pink%0d%0aK09503+white,blue%0d%0aK10666+white,red%0d%0aK07953+white,blue%0d%0aK10950+white,blue%0d%0aK13993+white,pink%0d%0aK03283+white,pink%0d%0a	Folding, sorting and degradation	Genetic Information Processing
9	Ubiquitin mediated proteolysis	KEGG PATHWAY	map04120	9/1135	361/18577	0.999625	1	MsG0180001676.01|MsG0780039456.01|MsG0080048388.01|MsG0180002394.01|MsG0480022347.01|MsG0880043588.01|MsG0780037903.01|MsG0380017515.01|MsG0380014153.01	http://www.genome.jp/kegg-bin/show_pathway?map=map04120&multi_query=K04506+white,blue%0d%0aK10581+white,red%0d%0aK03869+white,blue%0d%0aK06688+white,blue%0d%0aK08770+white,blue%0d%0aK10144+white,red%0d%0aK10610+white,red%0d%0aK03363+white,blue%0d%0a	Folding, sorting and degradation	Genetic Information Processing
2	mRNA surveillance pathway	KEGG PATHWAY	map03015	2/1135	178/18577	0.999839	1	MsG0380014079.01|MsG0380013898.01	http://www.genome.jp/kegg-bin/show_pathway?map=map03015&multi_query=K18655+white,red%0d%0a	Translation	Genetic Information Processing
7	Endocytosis	KEGG PATHWAY	map04144	7/1135	365/18577	0.999972	1	MsG0480020957.01|MsG0580026887.01|MsG0680031848.01|MsG0880047581.01|MsG0280006307.01|MsG0480022947.01|MsG0380017894.01	http://www.genome.jp/kegg-bin/show_pathway?map=map04144&multi_query=K01115+white,blue%0d%0aK12471+white,blue%0d%0aK07904+white,blue%0d%0aK00889+white,red%0d%0aK03283+white,pink%0d%0a	Transport and catabolism	Cellular Processes
4	Nucleocytoplasmic transport	KEGG PATHWAY	map03013	4/1135	288/18577	0.999985	1	MsG0080048705.01|MsG0180004918.01|MsG0380014079.01|MsG0380013898.01	http://www.genome.jp/kegg-bin/show_pathway?map=map03013&multi_query=K03231+white,red%0d%0aK14311+white,red%0d%0aK18655+white,red%0d%0a	Translation	Genetic Information Processing
1	RNA degradation	KEGG PATHWAY	map03018	1/1135	178/18577	0.999987	1	MsG0180004951.01	http://www.genome.jp/kegg-bin/show_pathway?map=map03018&multi_query=K00850+white,blue%0d%0a	Folding, sorting and degradation	Genetic Information Processing
