# Supplementary material for: Identification of Salt-Responsive Genes in Melatonin Regulated Alfalfa Salt Tolerance by Transcriptome Analysis
Source: Preprints.org preprint supplement (doi:10.20944/preprints202403.1815.v1), 2024-03-29
Supplement: Supplementary file 5 [file Table S6.xlsx]

## Sheet: membership
Supplemental table S6. Modules of differentially expressed genes identified by weighted gene co-expression network analysis (WGCNA).
seq_id	module	kme	block_id
MsG0080047806.01	yellow	0.640215	1
MsG0080047818.01	turquoise	0.709496	1
MsG0080047815.01	brown	0.919176	1
MsG0080047811.01	yellow	0.61796	1
MsG0080047788.01	blue	0.0399469	1
MsG0080047787.01	yellow	0.801493	1
MsG0080047789.01	yellow	0.529413	1
MsG0080047803.01	yellow	0.509451	1
MsG0080047812.01	turquoise	0.668272	1
MsG0080047793.01	yellow	0.721275	1
MsG0080047791.01	brown	0.632204	1
MsG0080047804.01	pink	0.6639	1
MsG0080047813.01	turquoise	0.629341	1
MsG0080047826.01	brown	0.414698	1
MsG0080047832.01	blue	0.465047	1
MsG0080047831.01	green	0.816145	1
MsG0080047820.01	brown	0.526932	1
MsG0080047989.01	blue	0.839059	1
MsG0080048057.01	turquoise	0.802923	1
MsG0080048224.01	turquoise	0.518436	1
MsG0080047959.01	yellow	0.669787	1
MsG0080048054.01	yellow	0.470059	1
MsG0080048206.01	turquoise	0.5089	1
MsG0080048301.01	turquoise	-0.154915	1
MsG0080047900.01	blue	0.740315	1
MsG0080048205.01	turquoise	0.782295	1
MsG0080048314.01	brown	0.742215	1
MsG0080048317.01	pink	0.797811	1
MsG0080047939.01	turquoise	0.711863	1
MsG0080047941.01	blue	0.323734	1
MsG0080047956.01	grey	0.928278	1
MsG0080047974.01	brown	0.525452	1
MsG0080047976.01	blue	0.67779	1
MsG0080047993.01	black	0.893129	1
MsG0080048275.01	blue	0.882105	1
MsG0080048281.01	blue	0.665156	1
MsG0080047861.01	blue	0.11636	1
MsG0080047877.01	turquoise	0.715935	1
MsG0080047897.01	turquoise	0.836048	1
MsG0080047899.01	blue	0.851441	1
MsG0080047963.01	black	0.687509	1
MsG0080048035.01	turquoise	0.93023	1
MsG0080048312.01	turquoise	0.893405	1
MsG0080047868.01	blue	0.490005	1
MsG0080048051.01	turquoise	0.0907911	1
MsG0080048110.01	turquoise	0.319393	1
MsG0080047837.01	yellow	0.456668	1
MsG0080047909.01	turquoise	0.338808	1
MsG0080048159.01	brown	0.567791	1
MsG0080048163.01	yellow	0.471479	1
MsG0080047874.01	black	0.598492	1
MsG0080047935.01	turquoise	0.462227	1
MsG0080047949.01	turquoise	0.52852	1
MsG0080047912.01	brown	0.620167	1
MsG0080047962.01	blue	0.652943	1
MsG0080047968.01	brown	0.853994	1
MsG0080048019.01	brown	0.570994	1
MsG0080047933.01	blue	0.778165	1
MsG0080047960.01	yellow	0.679905	1
MsG0080048027.01	turquoise	0.66512	1
MsG0080048204.01	turquoise	0.819183	1
MsG0080048220.01	pink	0.767992	1
MsG0080048221.01	turquoise	0.599431	1
MsG0080048291.01	brown	0.782054	1
MsG0080048298.01	blue	0.648521	1
MsG0080048319.01	yellow	0.611217	1
MsG0080048186.01	blue	0.849397	1
MsG0080048207.01	turquoise	0.819183	1
MsG0080048211.01	yellow	0.733434	1
MsG0080047885.01	brown	0.510544	1
MsG0080047924.01	blue	0.475417	1
MsG0080047991.01	yellow	0.448093	1
MsG0080048036.01	turquoise	0.791057	1
MsG0080048254.01	green	0.659807	1
MsG0080048255.01	brown	0.616372	1
MsG0080048313.01	blue	0.80726	1
MsG0080047936.01	blue	0.0409074	1
MsG0080047966.01	blue	0.389271	1
MsG0080047997.01	brown	0.664317	1
MsG0080048043.01	turquoise	0.723961	1
MsG0080048072.01	blue	0.254178	1
MsG0080048094.01	brown	0.51742	1
MsG0080048106.01	yellow	0.699433	1
MsG0080048178.01	turquoise	0.9109	1
MsG0080048214.01	yellow	0.484244	1
MsG0080048001.01	blue	0.759331	1
MsG0080048069.01	blue	0.856007	1
MsG0080048087.01	yellow	0.765213	1
MsG0080048113.01	brown	0.662397	1
MsG0080048198.01	brown	0.88698	1
MsG0080048203.01	turquoise	0.839536	1
MsG0080048212.01	turquoise	0.745449	1
MsG0080048247.01	turquoise	0.372316	1
MsG0080047904.01	brown	0.593381	1
MsG0080048292.01	yellow	0.649691	1
MsG0080048308.01	blue	0.422825	1
MsG0080047950.01	yellow	0.647286	1
MsG0080047958.01	yellow	0.154491	1
MsG0080047995.01	blue	0.469213	1
MsG0080048026.01	blue	0.879932	1
MsG0080048073.01	blue	0.295961	1
MsG0080048259.01	blue	0.192984	1
MsG0080048289.01	yellow	0.82717	1
MsG0080048302.01	turquoise	0.230629	1
MsG0080047910.01	blue	0.932949	1
MsG0080048018.01	brown	0.399681	1
MsG0080048065.01	yellow	0.635272	1
MsG0080048195.01	blue	0.0400692	1
MsG0080048197.01	brown	0.539366	1
MsG0080048231.01	turquoise	0.3563	1
MsG0080048240.01	yellow	0.571436	1
MsG0080047869.01	blue	0.605464	1
MsG0080047905.01	yellow	0.667775	1
MsG0080047908.01	blue	0.40824	1
MsG0080047954.01	brown	0.398515	1
MsG0080048046.01	blue	0.866719	1
MsG0080048047.01	turquoise	0.51207	1
MsG0080048107.01	blue	0.742389	1
MsG0080048151.01	turquoise	0.292547	1
MsG0080048243.01	greenyellow	0.716717	1
MsG0080048276.01	blue	0.611195	1
MsG0080048309.01	turquoise	0.900255	1
MsG0080048315.01	turquoise	0.881632	1
MsG0080047940.01	brown	0.596527	1
MsG0080047971.01	turquoise	0.250583	1
MsG0080047973.01	blue	0.856085	1
MsG0080047992.01	turquoise	0.591291	1
MsG0080048008.01	turquoise	0.435546	1
MsG0080048029.01	turquoise	0.700838	1
MsG0080048085.01	blue	0.779219	1
MsG0080048086.01	greenyellow	0.809361	1
MsG0080048152.01	brown	0.530624	1
MsG0080048177.01	turquoise	0.893363	1
MsG0080048215.01	red	0.653953	1
MsG0080048222.01	yellow	0.452327	1
MsG0080048232.01	blue	0.900957	1
MsG0080048248.01	yellow	0.596098	1
MsG0080048287.01	magenta	0.817979	1
MsG0080048299.01	yellow	0.374418	1
MsG0080047878.01	turquoise	0.600997	1
MsG0080047898.01	brown	0.669722	1
MsG0080047978.01	turquoise	0.473582	1
MsG0080048048.01	blue	0.659659	1
MsG0080048145.01	turquoise	0.661313	1
MsG0080048227.01	brown	0.832569	1
MsG0080048230.01	blue	0.788809	1
MsG0080048253.01	blue	0.538118	1
MsG0080048273.01	blue	0.187006	1
MsG0080048290.01	pink	0.852099	1
MsG0080048351.01	turquoise	0.30582	1
MsG0080048329.01	red	0.812527	1
MsG0080048345.01	turquoise	0.953552	1
MsG0080048463.01	turquoise	-0.191012	1
MsG0080048555.01	yellow	0.467892	1
MsG0080048556.01	blue	0.910467	1
MsG0080048623.01	blue	0.741089	1
MsG0080048638.01	brown	0.604142	1
MsG0080048719.01	blue	0.507707	1
MsG0080048788.01	green	0.760998	1
MsG0080048811.01	blue	0.740399	1
MsG0080048426.01	turquoise	0.104191	1
MsG0080048465.01	turquoise	-0.0191653	1
MsG0080048497.01	blue	0.898537	1
MsG0080048609.01	turquoise	0.565316	1
MsG0080048613.01	blue	0.913972	1
MsG0080048654.01	blue	0.759729	1
MsG0080048683.01	turquoise	0.631052	1
MsG0080048766.01	blue	0.761016	1
MsG0080048819.01	brown	0.691615	1
MsG0080048352.01	turquoise	0.800096	1
MsG0080048528.01	blue	0.836486	1
MsG0080048647.01	blue	0.0904468	1
MsG0080048697.01	red	0.927088	1
MsG0080048732.01	turquoise	0.866054	1
MsG0080048770.01	yellow	0.433218	1
MsG0080048333.01	blue	0.449222	1
MsG0080048399.01	blue	0.840755	1
MsG0080048445.01	turquoise	0.678887	1
MsG0080048633.01	turquoise	0.953166	1
MsG0080048636.01	blue	0.738488	1
MsG0080048716.01	purple	0.901494	1
MsG0080048731.01	turquoise	0.762552	1
MsG0080048741.01	blue	0.453917	1
MsG0080048749.01	blue	0.652582	1
MsG0080048773.01	blue	0.632516	1
MsG0080048815.01	blue	0.85064	1
MsG0080048349.01	turquoise	0.771342	1
MsG0080048592.01	turquoise	0.922971	1
MsG0080048653.01	brown	0.717316	1
MsG0080048672.01	yellow	0.189631	1
MsG0080048702.01	turquoise	0.785932	1
MsG0080048727.01	blue	0.38337	1
MsG0080048743.01	yellow	0.893215	1
MsG0080048348.01	turquoise	0.907259	1
MsG0080048361.01	brown	0.600731	1
MsG0080048451.01	blue	0.521253	1
MsG0080048506.01	turquoise	0.556007	1
MsG0080048527.01	brown	0.505348	1
MsG0080048588.01	yellow	0.570135	1
MsG0080048379.01	pink	0.767349	1
MsG0080048429.01	blue	0.584956	1
MsG0080048700.01	brown	0.853566	1
MsG0080048787.01	blue	0.775107	1
MsG0080048344.01	brown	0.672568	1
MsG0080048346.01	turquoise	0.911679	1
MsG0080048347.01	turquoise	0.92134	1
MsG0080048388.01	blue	0.655333	1
MsG0080048437.01	brown	0.645193	1
MsG0080048553.01	turquoise	0.672579	1
MsG0080048691.01	red	0.727575	1
MsG0080048693.01	yellow	0.760066	1
MsG0080048780.01	blue	0.976829	1
MsG0080048353.01	yellow	0.890415	1
MsG0080048781.01	brown	0.739183	1
MsG0080048785.01	yellow	0.604379	1
MsG0080048395.01	turquoise	0.427978	1
MsG0080048798.01	brown	0.687401	1
MsG0080048492.01	turquoise	0.45586	1
MsG0080048507.01	turquoise	0.529758	1
MsG0080048510.01	blue	0.428292	1
MsG0080048529.01	turquoise	0.636489	1
MsG0080048554.01	pink	0.890281	1
MsG0080048608.01	turquoise	0.719767	1
MsG0080048635.01	blue	0.928389	1
MsG0080048651.01	brown	0.576807	1
MsG0080048684.01	blue	0.397991	1
MsG0080048689.01	red	0.881592	1
MsG0080048694.01	turquoise	0.555507	1
MsG0080048712.01	turquoise	0.508184	1
MsG0080048767.01	green	0.914131	1
MsG0080048769.01	blue	0.660975	1
MsG0080048802.01	blue	0.507817	1
MsG0080048452.01	turquoise	0.343156	1
MsG0080048487.01	turquoise	0.392898	1
MsG0080048537.01	blue	0.267004	1
MsG0080048557.01	blue	0.862931	1
MsG0080048701.01	turquoise	0.456074	1
MsG0080048714.01	brown	0.662624	1
MsG0080048763.01	blue	0.394807	1
MsG0080048777.01	blue	0.799121	1
MsG0080048779.01	brown	0.748116	1
MsG0080048797.01	brown	0.610872	1
MsG0080048403.01	grey	0.908065	1
MsG0080048440.01	blue	0.720391	1
MsG0080048598.01	turquoise	0.744629	1
MsG0080048650.01	turquoise	0.733315	1
MsG0080048717.01	blue	0.613627	1
MsG0080048728.01	turquoise	0.570194	1
MsG0080048774.01	yellow	0.75465	1
MsG0080048794.01	turquoise	0.256581	1
MsG0080048505.01	blue	0.547406	1
MsG0080048567.01	turquoise	0.281076	1
MsG0080048668.01	green	0.437985	1
MsG0080048726.01	turquoise	0.484402	1
MsG0080048745.01	turquoise	0.908179	1
MsG0080048754.01	blue	0.852414	1
MsG0080048765.01	yellow	0.874761	1
MsG0080048387.01	turquoise	0.922713	1
MsG0080048443.01	black	0.654242	1
MsG0080048569.01	brown	0.510294	1
MsG0080048604.01	blue	0.2583	1
MsG0080048660.01	blue	0.451614	1
MsG0080048692.01	blue	0.0375458	1
MsG0080048695.01	turquoise	0.231247	1
MsG0080048708.01	turquoise	0.465317	1
MsG0080048724.01	red	0.503724	1
MsG0080048761.01	blue	0.553702	1
MsG0080048360.01	turquoise	-0.0051262	1
MsG0080048509.01	turquoise	0.465744	1
MsG0080048560.01	red	0.968668	1
MsG0080048652.01	turquoise	0.737826	1
MsG0080048757.01	yellow	0.0445772	1
MsG0080048818.01	yellow	0.861813	1
MsG0080048322.01	brown	0.280532	1
MsG0080048423.01	brown	0.668831	1
MsG0080048454.01	turquoise	0.481407	1
MsG0080048460.01	brown	0.497506	1
MsG0080048599.01	blue	0.304766	1
MsG0080048357.01	brown	0.771192	1
MsG0080048375.01	yellow	0.883068	1
MsG0080048669.01	blue	0.631541	1
MsG0080048748.01	yellow	0.690443	1
MsG0080048428.01	brown	0.736484	1
MsG0080048801.01	blue	0.854081	1
MsG0080048676.01	blue	0.615082	1
MsG0080048775.01	brown	0.778609	1
MsG0080048778.01	turquoise	0.560055	1
MsG0080048800.01	blue	0.887555	1
MsG0080048354.01	turquoise	0.639845	1
MsG0080048389.01	blue	0.463862	1
MsG0080048397.01	blue	0.789126	1
MsG0080048458.01	turquoise	0.39253	1
MsG0080048462.01	yellow	0.190052	1
MsG0080048511.01	pink	0.86809	1
MsG0080048600.01	magenta	0.675301	1
MsG0080048619.01	turquoise	0.587293	1
MsG0080048690.01	red	0.828418	1
MsG0080048709.01	turquoise	0.46978	1
MsG0080048711.01	yellow	0.761088	1
MsG0080048755.01	magenta	0.422886	1
MsG0080048772.01	brown	0.837585	1
MsG0080048822.01	turquoise	0.72141	1
MsG0080048836.01	yellow	0.347918	1
MsG0080048826.01	blue	0.721797	1
MsG0080048827.01	yellow	0.718572	1
MsG0080048833.01	blue	0.368545	1
MsG0080048846.01	blue	0.633502	1
MsG0080048820.01	blue	0.792739	1
MsG0080048858.01	blue	0.549822	1
MsG0080048896.01	blue	0.869477	1
MsG0080048941.01	brown	0.604418	1
MsG0080048978.01	yellow	0.627885	1
MsG0080048975.01	brown	0.390426	1
MsG0080048992.01	blue	0.943361	1
MsG0080049020.01	brown	0.892435	1
MsG0080049028.01	blue	0.806924	1
MsG0080049038.01	blue	0.864252	1
MsG0080049040.01	blue	0.93097	1
MsG0180000075.01	turquoise	0.54166	1
MsG0080049044.01	turquoise	0.661467	1
MsG0180000095.01	red	0.735288	1
MsG0080049069.01	blue	0.457978	1
MsG0080049077.01	green	0.790617	1
MsG0080049079.01	blue	0.364014	1
MsG0080048838.01	turquoise	0.563702	1
MsG0180000011.01	blue	0.639271	1
MsG0180000051.01	turquoise	0.939029	1
MsG0080048878.01	blue	0.950717	1
MsG0080048888.01	yellow	0.639772	1
MsG0180000111.01	turquoise	0.730024	1
MsG0080048925.01	yellow	0.587701	1
MsG0180000133.01	brown	0.908147	1
MsG0080048944.01	blue	0.377742	1
MsG0180000151.01	turquoise	0.958225	1
MsG0080048955.01	green	0.471735	1
MsG0080049026.01	turquoise	0.227014	1
MsG0080049128.01	turquoise	0.963943	1
MsG0180000024.01	turquoise	0.706911	1
MsG0180000026.01	blue	0.630508	1
MsG0180000030.01	blue	0.85093	1
MsG0180000056.01	brown	0.317549	1
MsG0180000059.01	yellow	0.543411	1
MsG0180000068.01	turquoise	0.29286	1
MsG0180000149.01	brown	0.740402	1
MsG0080048847.01	brown	0.408259	1
MsG0080048849.01	blue	0.659585	1
MsG0080048890.01	brown	0.644986	1
MsG0080048932.01	blue	0.433221	1
MsG0080048967.01	turquoise	0.789223	1
MsG0080048986.01	blue	0.899007	1
MsG0080048998.01	brown	0.505978	1
MsG0080049066.01	yellow	0.530225	1
MsG0080049072.01	blue	0.873928	1
MsG0080049139.01	blue	0.686365	1
MsG0080049145.01	turquoise	-0.0767621	1
MsG0180000019.01	turquoise	0.928836	1
MsG0180000038.01	brown	0.785665	1
MsG0180000074.01	blue	0.573168	1
MsG0180000107.01	blue	0.163028	1
MsG0080048829.01	brown	0.746387	1
MsG0080048887.01	blue	0.653066	1
MsG0080048917.01	blue	0.89446	1
MsG0080048921.01	brown	0.684943	1
MsG0080048945.01	blue	0.72495	1
MsG0080049021.01	brown	0.838924	1
MsG0080049039.01	blue	0.940513	1
MsG0080049051.01	yellow	0.402408	1
MsG0080049080.01	red	0.852469	1
MsG0080049136.01	turquoise	0.843589	1
MsG0080049147.01	blue	0.699576	1
MsG0080049160.01	turquoise	0.346038	1
MsG0180000025.01	blue	0.322251	1
MsG0180000052.01	yellow	0.792272	1
MsG0180000065.01	brown	0.800605	1
MsG0180000120.01	brown	0.785896	1
MsG0080048905.01	yellow	0.455649	1
MsG0080048912.01	blue	0.682401	1
MsG0080048929.01	blue	0.843383	1
MsG0080048989.01	blue	0.791977	1
MsG0080049042.01	turquoise	0.83508	1
MsG0080049137.01	turquoise	0.527853	1
MsG0080049149.01	purple	0.938501	1
MsG0180000088.01	yellow	0.713917	1
MsG0180000098.01	turquoise	0.891457	1
MsG0180000139.01	brown	0.877419	1
MsG0080048864.01	blue	0.708221	1
MsG0080048924.01	blue	0.603567	1
MsG0080048991.01	brown	0.754261	1
MsG0080049111.01	brown	0.596808	1
MsG0180000006.01	brown	0.913897	1
MsG0180000016.01	brown	0.732429	1
MsG0180000020.01	turquoise	0.105615	1
MsG0180000040.01	brown	0.775386	1
MsG0180000106.01	blue	0.481063	1
MsG0180000121.01	turquoise	0.410431	1
MsG0180000123.01	turquoise	0.846099	1
MsG0180000144.01	brown	0.750171	1
MsG0080048830.01	turquoise	0.584978	1
MsG0080048862.01	turquoise	0.984174	1
MsG0080048919.01	yellow	0.701304	1
MsG0080048947.01	blue	0.117514	1
MsG0080048983.01	yellow	0.392463	1
MsG0080049018.01	blue	0.698816	1
MsG0080049073.01	turquoise	0.441425	1
MsG0080049076.01	brown	0.0981165	1
MsG0180000023.01	purple	0.608912	1
MsG0180000141.01	turquoise	0.617341	1
MsG0080048969.01	blue	0.696001	1
MsG0080049030.01	brown	0.275478	1
MsG0080049058.01	brown	0.571009	1
MsG0080049070.01	blue	0.895642	1
MsG0180000072.01	brown	0.759802	1
MsG0180000113.01	blue	0.850522	1
MsG0180000131.01	blue	0.660677	1
MsG0080049002.01	brown	0.932465	1
MsG0080049019.01	blue	0.855823	1
MsG0180000013.01	blue	0.307336	1
MsG0180000027.01	blue	0.862573	1
MsG0180000150.01	turquoise	0.588166	1
MsG0080048899.01	brown	0.638711	1
MsG0180000153.01	yellow	0.348319	1
MsG0080048915.01	turquoise	0.870745	1
MsG0080048961.01	turquoise	0.686158	1
MsG0080048999.01	turquoise	0.86911	1
MsG0080049063.01	brown	0.49449	1
MsG0080049159.01	yellow	0.81858	1
MsG0180000009.01	turquoise	0.617445	1
MsG0180000060.01	blue	0.482762	1
MsG0180000102.01	turquoise	0.873766	1
MsG0180000105.01	blue	0.376439	1
MsG0180000126.01	turquoise	0.94278	1
MsG0180000147.01	turquoise	0.67352	1
MsG0080048946.01	turquoise	0.437595	1
MsG0080048987.01	blue	0.619511	1
MsG0080048990.01	blue	0.389414	1
MsG0080049024.01	blue	0.885071	1
MsG0080049047.01	brown	0.857889	1
MsG0080049102.01	turquoise	0.663646	1
MsG0080048840.01	yellow	0.273036	1
MsG0080048939.01	turquoise	0.869335	1
MsG0080048948.01	blue	0.755173	1
MsG0080049101.01	turquoise	0.464317	1
MsG0080049130.01	blue	0.269731	1
MsG0080049135.01	brown	0.833662	1
MsG0080049162.01	red	0.421719	1
MsG0180000028.01	blue	0.663911	1
MsG0180000029.01	turquoise	0.523675	1
MsG0180000036.01	brown	0.785859	1
MsG0180000048.01	turquoise	0.756714	1
MsG0180000076.01	brown	0.528264	1
MsG0080048874.01	blue	0.779687	1
MsG0080048877.01	blue	0.623479	1
MsG0080048880.01	blue	0.765876	1
MsG0080048913.01	blue	0.31479	1
MsG0080048959.01	brown	0.540375	1
MsG0080048966.01	blue	0.877412	1
MsG0080049017.01	brown	0.32089	1
MsG0080049034.01	brown	0.66006	1
MsG0080049043.01	turquoise	0.87843	1
MsG0080049045.01	turquoise	0.852005	1
MsG0080049046.01	turquoise	0.80136	1
MsG0080049127.01	blue	0.209621	1
MsG0180000045.01	brown	0.635906	1
MsG0180000064.01	brown	0.870585	1
MsG0180000152.01	blue	0.836068	1
MsG0080048835.01	yellow	0.575996	1
MsG0080048842.01	blue	0.462935	1
MsG0080048865.01	turquoise	0.405514	1
MsG0080048900.01	blue	0.849001	1
MsG0080049004.01	blue	0.949844	1
MsG0080049140.01	brown	0.799254	1
MsG0080048861.01	blue	0.867841	1
MsG0180000054.01	brown	0.366817	1
MsG0080048892.01	yellow	0.511895	1
MsG0180000071.01	turquoise	0.390631	1
MsG0080048898.01	blue	0.335678	1
MsG0180000115.01	blue	0.829362	1
MsG0080048934.01	turquoise	0.885275	1
MsG0080048940.01	turquoise	0.879489	1
MsG0080048956.01	turquoise	0.0140812	1
MsG0080049029.01	blue	0.929551	1
MsG0080049048.01	blue	0.570268	1
MsG0080049049.01	turquoise	0.797242	1
MsG0080049061.01	turquoise	-0.20689	1
MsG0080049062.01	blue	0.823314	1
MsG0080049078.01	red	0.684567	1
MsG0180000170.01	brown	0.534937	1
MsG0180000155.01	blue	0.854431	1
MsG0180000176.01	yellow	0.58924	1
MsG0180000159.01	turquoise	0.746186	1
MsG0180000156.01	brown	0.279042	1
MsG0180000182.01	turquoise	0.551097	1
MsG0180000193.01	blue	0.89727	1
MsG0180000243.01	turquoise	0.652847	1
MsG0180000363.01	turquoise	0.836343	1
MsG0180000383.01	turquoise	0.862892	1
MsG0180000457.01	turquoise	-0.280644	1
MsG0180000493.01	turquoise	0.586272	1
MsG0180000500.01	turquoise	0.443207	1
MsG0180000570.01	turquoise	0.783907	1
MsG0180000624.01	yellow	0.553579	1
MsG0180000627.01	brown	0.43952	1
MsG0180000653.01	turquoise	0.798748	1
MsG0180000169.01	green	0.345595	1
MsG0180000234.01	turquoise	0.943438	1
MsG0180000252.01	turquoise	0.824458	1
MsG0180000260.01	turquoise	0.624332	1
MsG0180000295.01	turquoise	0.742002	1
MsG0180000296.01	turquoise	0.730308	1
MsG0180000341.01	yellow	0.369806	1
MsG0180000436.01	turquoise	0.947692	1
MsG0180000590.01	green	0.752932	1
MsG0180000221.01	turquoise	0.803793	1
MsG0180000251.01	turquoise	0.706453	1
MsG0180000255.01	turquoise	0.748855	1
MsG0180000259.01	brown	0.228293	1
MsG0180000360.01	blue	0.757409	1
MsG0180000391.01	green	0.55299	1
MsG0180000438.01	turquoise	0.970234	1
MsG0180000447.01	brown	0.395563	1
MsG0180000464.01	brown	0.687231	1
MsG0180000474.01	turquoise	0.849057	1
MsG0180000241.01	brown	0.692097	1
MsG0180000267.01	turquoise	0.939639	1
MsG0180000284.01	turquoise	0.889906	1
MsG0180000311.01	yellow	0.779753	1
MsG0180000372.01	turquoise	0.608086	1
MsG0180000404.01	brown	0.915062	1
MsG0180000598.01	turquoise	0.933917	1
MsG0180000609.01	blue	0.931033	1
MsG0180000634.01	turquoise	0.392077	1
MsG0180000638.01	blue	0.653889	1
MsG0180000177.01	brown	0.92139	1
MsG0180000237.01	brown	0.377395	1
MsG0180000184.01	blue	0.867147	1
MsG0180000264.01	blue	0.879662	1
MsG0180000230.01	turquoise	0.808162	1
MsG0180000282.01	turquoise	0.183394	1
MsG0180000292.01	blue	0.934341	1
MsG0180000314.01	brown	0.511853	1
MsG0180000351.01	blue	0.538732	1
MsG0180000185.01	turquoise	0.412734	1
MsG0180000353.01	brown	0.945301	1
MsG0180000333.01	blue	0.716026	1
MsG0180000366.01	blue	0.831568	1
MsG0180000334.01	brown	0.0710223	1
MsG0180000198.01	turquoise	0.847218	1
MsG0180000367.01	turquoise	0.945958	1
MsG0180000412.01	turquoise	0.226171	1
MsG0180000376.01	turquoise	0.615504	1
MsG0180000413.01	black	0.728351	1
MsG0180000257.01	turquoise	0.810005	1
MsG0180000443.01	green	0.477169	1
MsG0180000263.01	blue	0.116673	1
MsG0180000450.01	red	0.539148	1
MsG0180000467.01	blue	0.802866	1
MsG0180000326.01	turquoise	0.914939	1
MsG0180000498.01	blue	0.655752	1
MsG0180000489.01	brown	0.585366	1
MsG0180000509.01	blue	0.746435	1
MsG0180000386.01	turquoise	0.837823	1
MsG0180000551.01	turquoise	0.51499	1
MsG0180000431.01	blue	0.862692	1
MsG0180000596.01	turquoise	0.459019	1
MsG0180000520.01	yellow	0.226422	1
MsG0180000599.01	brown	0.618902	1
MsG0180000446.01	turquoise	0.383523	1
MsG0180000462.01	blue	0.768382	1
MsG0180000540.01	brown	0.604071	1
MsG0180000619.01	turquoise	0.941892	1
MsG0180000567.01	turquoise	0.88451	1
MsG0180000594.01	turquoise	0.489122	1
MsG0180000534.01	brown	0.783394	1
MsG0180000536.01	turquoise	0.598239	1
MsG0180000556.01	blue	0.652292	1
MsG0180000576.01	blue	0.912784	1
MsG0180000589.01	turquoise	0.247567	1
MsG0180000608.01	brown	0.542921	1
MsG0180000222.01	brown	0.61599	1
MsG0180000262.01	turquoise	0.292484	1
MsG0180000174.01	brown	0.742812	1
MsG0180000304.01	green	0.771292	1
MsG0180000318.01	yellow	0.762233	1
MsG0180000200.01	yellow	0.356458	1
MsG0180000272.01	red	0.649587	1
MsG0180000365.01	turquoise	0.786071	1
MsG0180000377.01	yellow	0.686167	1
MsG0180000297.01	turquoise	0.655553	1
MsG0180000395.01	turquoise	0.897367	1
MsG0180000337.01	turquoise	0.988534	1
MsG0180000403.01	blue	0.733515	1
MsG0180000405.01	turquoise	0.47884	1
MsG0180000456.01	brown	0.14131	1
MsG0180000497.01	brown	0.433228	1
MsG0180000466.01	turquoise	0.832317	1
MsG0180000530.01	turquoise	0.983192	1
MsG0180000622.01	turquoise	0.318108	1
MsG0180000165.01	blue	0.422891	1
MsG0180000201.01	blue	0.672555	1
MsG0180000275.01	blue	0.891473	1
MsG0180000321.01	turquoise	0.812393	1
MsG0180000340.01	green	0.765075	1
MsG0180000348.01	brown	0.935963	1
MsG0180000424.01	brown	0.412258	1
MsG0180000592.01	green	0.752287	1
MsG0180000623.01	turquoise	0.769429	1
MsG0180000226.01	turquoise	0.808437	1
MsG0180000344.01	brown	0.649186	1
MsG0180000354.01	blue	0.908856	1
MsG0180000414.01	turquoise	0.882912	1
MsG0180000437.01	turquoise	0.95731	1
MsG0180000440.01	turquoise	0.784302	1
MsG0180000455.01	blue	0.880627	1
MsG0180000538.01	turquoise	0.868946	1
MsG0180000557.01	brown	0.790564	1
MsG0180000577.01	green	0.835726	1
MsG0180000595.01	turquoise	0.35804	1
MsG0180000203.01	turquoise	0.282439	1
MsG0180000210.01	yellow	0.658656	1
MsG0180000307.01	turquoise	0.973485	1
MsG0180000324.01	blue	0.493392	1
MsG0180000331.01	blue	0.48832	1
MsG0180000350.01	blue	0.702196	1
MsG0180000508.01	turquoise	0.382543	1
MsG0180000521.01	blue	0.454253	1
MsG0180000562.01	blue	0.42134	1
MsG0180000600.01	blue	0.938932	1
MsG0180000157.01	turquoise	0.873277	1
MsG0180000197.01	turquoise	0.847239	1
MsG0180000384.01	turquoise	0.756466	1
MsG0180000445.01	turquoise	0.824499	1
MsG0180000478.01	turquoise	0.233833	1
MsG0180000479.01	turquoise	0.923645	1
MsG0180000648.01	blue	0.0560796	1
MsG0180000166.01	yellow	0.715541	1
MsG0180000189.01	turquoise	0.701694	1
MsG0180000300.01	turquoise	0.777283	1
MsG0180000358.01	turquoise	0.254007	1
MsG0180000399.01	turquoise	0.938866	1
MsG0180000423.01	blue	0.929559	1
MsG0180000427.01	turquoise	0.799788	1
MsG0180000481.01	brown	-0.130127	1
MsG0180000513.01	blue	0.411836	1
MsG0180000553.01	turquoise	0.451627	1
MsG0180000554.01	turquoise	0.761247	1
MsG0180000604.01	brown	0.285823	1
MsG0180000639.01	brown	0.899346	1
MsG0180000235.01	turquoise	0.610898	1
MsG0180000253.01	turquoise	0.778309	1
MsG0180000289.01	brown	0.794376	1
MsG0180000361.01	brown	0.677666	1
MsG0180000373.01	turquoise	0.782391	1
MsG0180000378.01	turquoise	0.696962	1
MsG0180000406.01	green	0.633228	1
MsG0180000451.01	turquoise	0.810459	1
MsG0180000482.01	blue	0.779032	1
MsG0180000503.01	blue	0.385991	1
MsG0180000552.01	yellow	0.416372	1
MsG0180000571.01	turquoise	0.350344	1
MsG0180000602.01	turquoise	0.549274	1
MsG0180000175.01	turquoise	0.808269	1
MsG0180000180.01	blue	0.282492	1
MsG0180000205.01	blue	0.826531	1
MsG0180000223.01	blue	0.913026	1
MsG0180000274.01	blue	0.789421	1
MsG0180000277.01	blue	0.756731	1
MsG0180000290.01	blue	0.544734	1
MsG0180000306.01	red	0.689437	1
MsG0180000355.01	blue	0.900686	1
MsG0180000491.01	yellow	0.340063	1
MsG0180000555.01	brown	0.92123	1
MsG0180000584.01	brown	0.787537	1
MsG0180000629.01	yellow	0.684263	1
MsG0180000645.01	turquoise	0.931912	1
MsG0180000672.01	blue	0.507112	1
MsG0180000685.01	turquoise	0.557687	1
MsG0180000665.01	magenta	0.76379	1
MsG0180000772.01	blue	0.141317	1
MsG0180000875.01	turquoise	0.39409	1
MsG0180000876.01	blue	0.463212	1
MsG0180000977.01	turquoise	0.449017	1
MsG0180000993.01	turquoise	0.942154	1
MsG0180001048.01	yellow	0.542061	1
MsG0180001097.01	brown	0.36648	1
MsG0180001100.01	blue	0.687483	1
MsG0180001115.01	brown	0.519042	1
MsG0180000813.01	blue	0.391357	1
MsG0180000845.01	blue	0.717651	1
MsG0180000857.01	blue	0.509877	1
MsG0180000914.01	yellow	0.706373	1
MsG0180000957.01	green	0.284446	1
MsG0180000962.01	turquoise	0.33338	1
MsG0180000976.01	green	0.492035	1
MsG0180001023.01	brown	0.513359	1
MsG0180001049.01	turquoise	0.890507	1
MsG0180001120.01	turquoise	0.713188	1
MsG0180001122.01	turquoise	0.732446	1
MsG0180001131.01	blue	0.492676	1
MsG0180001140.01	blue	0.957918	1
MsG0180001143.01	turquoise	0.634175	1
MsG0180000747.01	brown	0.584235	1
MsG0180000785.01	brown	0.519194	1
MsG0180000804.01	brown	0.683986	1
MsG0180000889.01	brown	0.459412	1
MsG0180000674.01	blue	0.898309	1
MsG0180000974.01	blue	0.331117	1
MsG0180000676.01	yellow	0.737372	1
MsG0180000778.01	brown	0.427222	1
MsG0180000807.01	brown	0.711807	1
MsG0180000833.01	blue	0.586096	1
MsG0180000855.01	turquoise	0.766919	1
MsG0180001093.01	brown	0.769153	1
MsG0180000883.01	turquoise	0.64636	1
MsG0180000888.01	turquoise	0.34315	1
MsG0180000929.01	turquoise	0.937182	1
MsG0180000953.01	turquoise	0.854949	1
MsG0180000969.01	black	0.684363	1
MsG0180001006.01	turquoise	0.790519	1
MsG0180001035.01	green	0.524525	1
MsG0180000741.01	brown	0.853067	1
MsG0180000867.01	blue	0.345292	1
MsG0180000871.01	turquoise	0.786502	1
MsG0180000961.01	turquoise	0.597431	1
MsG0180001002.01	yellow	0.395648	1
MsG0180001022.01	blue	0.206642	1
MsG0180001027.01	turquoise	0.9512	1
MsG0180001030.01	turquoise	0.250417	1
MsG0180001073.01	brown	0.90543	1
MsG0180001079.01	turquoise	-0.0013638	1
MsG0180001082.01	brown	0.677768	1
MsG0180001085.01	blue	0.948021	1
MsG0180001088.01	brown	0.414674	1
MsG0180001148.01	turquoise	0.659292	1
MsG0180000675.01	blue	0.915972	1
MsG0180000698.01	turquoise	0.617997	1
MsG0180000744.01	yellow	0.523553	1
MsG0180000752.01	green	0.437374	1
MsG0180000761.01	brown	0.54636	1
MsG0180000777.01	brown	0.30443	1
MsG0180000790.01	pink	0.852121	1
MsG0180001055.01	brown	0.753041	1
MsG0180001060.01	blue	0.920234	1
MsG0180000786.01	brown	0.645151	1
MsG0180000793.01	blue	0.949949	1
MsG0180000812.01	brown	0.548728	1
MsG0180000821.01	turquoise	0.450628	1
MsG0180000843.01	blue	0.583623	1
MsG0180000897.01	turquoise	0.923373	1
MsG0180000965.01	turquoise	0.951843	1
MsG0180000988.01	turquoise	0.896116	1
MsG0180001044.01	brown	0.753134	1
MsG0180001059.01	brown	0.537263	1
MsG0180001072.01	blue	0.913926	1
MsG0180001086.01	blue	0.535688	1
MsG0180001121.01	turquoise	0.519578	1
MsG0180001129.01	turquoise	0.931275	1
MsG0180001137.01	blue	0.866676	1
MsG0180001139.01	turquoise	0.81457	1
MsG0180000734.01	turquoise	0.453097	1
MsG0180000753.01	turquoise	0.218102	1
MsG0180000791.01	blue	0.64555	1
MsG0180000792.01	greenyellow	0.916848	1
MsG0180000809.01	yellow	0.774555	1
MsG0180000846.01	blue	0.934568	1
MsG0180000864.01	black	0.651876	1
MsG0180000935.01	turquoise	0.866485	1
MsG0180000980.01	blue	0.82754	1
MsG0180001094.01	turquoise	0.903408	1
MsG0180001126.01	yellow	0.194411	1
MsG0180001154.01	turquoise	0.774586	1
MsG0180000787.01	brown	0.72905	1
MsG0180000814.01	yellow	0.801992	1
MsG0180001004.01	brown	0.590225	1
MsG0180001029.01	turquoise	0.923097	1
MsG0180001084.01	turquoise	0.627549	1
MsG0180001109.01	brown	0.797842	1
MsG0180001130.01	turquoise	0.129555	1
MsG0180001138.01	blue	0.91471	1
MsG0180000664.01	blue	0.18879	1
MsG0180000719.01	red	0.878149	1
MsG0180000840.01	blue	0.350415	1
MsG0180000899.01	turquoise	0.944276	1
MsG0180000941.01	green	0.531325	1
MsG0180001042.01	turquoise	0.954992	1
MsG0180001089.01	blue	0.73354	1
MsG0180001104.01	green	0.641518	1
MsG0180000710.01	blue	0.3786	1
MsG0180000762.01	turquoise	0.925167	1
MsG0180000865.01	blue	0.37424	1
MsG0180000959.01	turquoise	0.375994	1
MsG0180000971.01	turquoise	0.640837	1
MsG0180000983.01	turquoise	0.812237	1
MsG0180001028.01	turquoise	0.580013	1
MsG0180001065.01	turquoise	0.513522	1
MsG0180001090.01	turquoise	0.688641	1
MsG0180001091.01	brown	0.500293	1
MsG0180001133.01	turquoise	0.616263	1
MsG0180001150.01	turquoise	0.90613	1
MsG0180000727.01	blue	0.754637	1
MsG0180000817.01	black	0.591255	1
MsG0180000920.01	turquoise	0.754085	1
MsG0180000942.01	turquoise	-0.216345	1
MsG0180000986.01	turquoise	0.372764	1
MsG0180000671.01	blue	0.861116	1
MsG0180000680.01	yellow	0.643827	1
MsG0180000705.01	yellow	0.763088	1
MsG0180000751.01	turquoise	0.402633	1
MsG0180000798.01	blue	0.118177	1
MsG0180000934.01	brown	0.68128	1
MsG0180000949.01	turquoise	0.895887	1
MsG0180000979.01	brown	0.70646	1
MsG0180001153.01	brown	0.660116	1
MsG0180000759.01	brown	0.593884	1
MsG0180000774.01	turquoise	0.80974	1
MsG0180000782.01	brown	0.593582	1
MsG0180000824.01	blue	0.837528	1
MsG0180000844.01	turquoise	0.93505	1
MsG0180000678.01	blue	0.267397	1
MsG0180000866.01	blue	0.300061	1
MsG0180000687.01	blue	0.880949	1
MsG0180000885.01	turquoise	0.767529	1
MsG0180000729.01	turquoise	0.85126	1
MsG0180000968.01	turquoise	0.923962	1
MsG0180000730.01	blue	0.812369	1
MsG0180000996.01	blue	0.746438	1
MsG0180000794.01	blue	0.158183	1
MsG0180001053.01	turquoise	0.950944	1
MsG0180000823.01	brown	0.0580015	1
MsG0180001095.01	turquoise	0.880676	1
MsG0180001125.01	turquoise	0.926982	1
MsG0180000984.01	turquoise	0.805205	1
MsG0180001050.01	turquoise	0.89307	1
MsG0180001057.01	turquoise	0.656341	1
MsG0180001061.01	turquoise	-0.0232292	1
MsG0180001075.01	turquoise	0.806143	1
MsG0180001099.01	blue	0.59196	1
MsG0180001135.01	turquoise	0.780959	1
MsG0180000722.01	blue	0.728623	1
MsG0180000784.01	brown	0.492719	1
MsG0180000822.01	turquoise	0.746645	1
MsG0180000930.01	turquoise	0.965674	1
MsG0180000936.01	turquoise	0.842108	1
MsG0180001032.01	red	0.709895	1
MsG0180001034.01	blue	0.159477	1
MsG0180001054.01	blue	0.792642	1
MsG0180001108.01	turquoise	0.826807	1
MsG0180001149.01	turquoise	0.892061	1
MsG0180001168.01	brown	0.743123	1
MsG0180001170.01	brown	0.740507	1
MsG0180001176.01	blue	0.724816	1
MsG0180001183.01	blue	0.55209	1
MsG0180001186.01	brown	0.00931989	1
MsG0180001203.01	yellow	0.446133	1
MsG0180001245.01	blue	0.535529	1
MsG0180001253.01	brown	0.266338	1
MsG0180001355.01	turquoise	0.454069	1
MsG0180001371.01	blue	0.786679	1
MsG0180001469.01	yellow	0.962867	1
MsG0180001489.01	brown	0.564168	1
MsG0180001546.01	brown	0.537626	1
MsG0180001610.01	blue	0.803382	1
MsG0180001405.01	yellow	0.627491	1
MsG0180001442.01	turquoise	0.55906	1
MsG0180001466.01	black	0.840504	1
MsG0180001470.01	brown	0.697913	1
MsG0180001577.01	blue	0.787753	1
MsG0180001594.01	red	0.89883	1
MsG0180001600.01	blue	0.465263	1
MsG0180001257.01	blue	0.682399	1
MsG0180001291.01	brown	0.847182	1
MsG0180001293.01	brown	0.799695	1
MsG0180001352.01	turquoise	0.530193	1
MsG0180001471.01	blue	0.521527	1
MsG0180001486.01	yellow	0.067501	1
MsG0180001553.01	brown	0.569458	1
MsG0180001575.01	blue	0.801479	1
MsG0180001633.01	turquoise	0.753798	1
MsG0180001639.01	blue	0.148218	1
MsG0180001649.01	yellow	0.697327	1
MsG0180001164.01	blue	0.722242	1
MsG0180001358.01	turquoise	0.368041	1
MsG0180001364.01	blue	0.796532	1
MsG0180001552.01	brown	0.153713	1
MsG0180001213.01	brown	0.536424	1
MsG0180001259.01	brown	0.78592	1
MsG0180001277.01	turquoise	0.644405	1
MsG0180001354.01	yellow	0.260159	1
MsG0180001453.01	turquoise	0.642447	1
MsG0180001548.01	yellow	0.557311	1
MsG0180001276.01	blue	0.630588	1
MsG0180001284.01	yellow	0.286822	1
MsG0180001286.01	yellow	0.896056	1
MsG0180001314.01	red	0.703088	1
MsG0180001538.01	brown	0.870163	1
MsG0180001566.01	turquoise	0.719799	1
MsG0180001573.01	blue	0.850844	1
MsG0180001611.01	blue	0.724156	1
MsG0180001271.01	turquoise	0.922504	1
MsG0180001409.01	blue	0.0790483	1
MsG0180001446.01	blue	0.434113	1
MsG0180001499.01	turquoise	0.760394	1
MsG0180001247.01	blue	0.666301	1
MsG0180001321.01	brown	0.531667	1
MsG0180001357.01	blue	0.667856	1
MsG0180001435.01	yellow	0.666452	1
MsG0180001457.01	green	0.404777	1
MsG0180001475.01	brown	0.521554	1
MsG0180001501.01	turquoise	0.777874	1
MsG0180001172.01	brown	0.608372	1
MsG0180001393.01	turquoise	0.661788	1
MsG0180001403.01	turquoise	0.752727	1
MsG0180001452.01	turquoise	0.722777	1
MsG0180001507.01	blue	0.699214	1
MsG0180001177.01	yellow	0.244475	1
MsG0180001205.01	turquoise	0.898733	1
MsG0180001258.01	turquoise	0.839543	1
MsG0180001269.01	blue	0.492467	1
MsG0180001279.01	blue	0.482119	1
MsG0180001280.01	yellow	0.610855	1
MsG0180001459.01	turquoise	0.467012	1
MsG0180001462.01	turquoise	0.686539	1
MsG0180001481.01	yellow	0.54535	1
MsG0180001484.01	blue	0.742749	1
MsG0180001282.01	black	0.780468	1
MsG0180001311.01	brown	0.88453	1
MsG0180001360.01	blue	0.658289	1
MsG0180001391.01	turquoise	0.733456	1
MsG0180001527.01	yellow	0.772432	1
MsG0180001534.01	turquoise	0.410987	1
MsG0180001544.01	blue	0.080378	1
MsG0180001598.01	blue	0.608574	1
MsG0180001175.01	blue	0.877074	1
MsG0180001318.01	brown	0.580285	1
MsG0180001402.01	brown	0.599184	1
MsG0180001406.01	yellow	0.585301	1
MsG0180001476.01	turquoise	0.48194	1
MsG0180001524.01	turquoise	0.663553	1
MsG0180001621.01	blue	-0.0345753	1
MsG0180001191.01	brown	0.543795	1
MsG0180001244.01	brown	0.380747	1
MsG0180001412.01	blue	0.174366	1
MsG0180001365.01	yellow	0.898646	1
MsG0180001381.01	blue	0.52804	1
MsG0180001398.01	red	0.506538	1
MsG0180001463.01	turquoise	0.802754	1
MsG0180001492.01	brown	0.468232	1
MsG0180001179.01	yellow	0.62825	1
MsG0180001189.01	blue	0.7471	1
MsG0180001207.01	blue	0.216774	1
MsG0180001231.01	blue	0.549716	1
MsG0180001312.01	blue	0.634282	1
MsG0180001329.01	brown	0.555935	1
MsG0180001361.01	yellow	0.59944	1
MsG0180001367.01	blue	0.608568	1
MsG0180001480.01	brown	0.706601	1
MsG0180001522.01	brown	0.681682	1
MsG0180001198.01	brown	0.725077	1
MsG0180001399.01	yellow	0.798431	1
MsG0180001414.01	turquoise	0.448982	1
MsG0180001443.01	yellow	0.681247	1
MsG0180001601.01	greenyellow	0.792576	1
MsG0180001612.01	brown	0.733413	1
MsG0180001660.01	turquoise	0.793714	1
MsG0180001658.01	blue	-0.0134486	1
MsG0180001662.01	tan	0.856812	1
MsG0180001663.01	turquoise	0.877524	1
MsG0180001732.01	yellow	0.510788	1
MsG0180001922.01	turquoise	0.698161	1
MsG0180001989.01	yellow	0.737452	1
MsG0180002067.01	turquoise	0.616987	1
MsG0180002100.01	turquoise	0.56232	1
MsG0180001836.01	blue	0.487511	1
MsG0180001867.01	turquoise	0.668472	1
MsG0180001915.01	turquoise	0.80136	1
MsG0180001998.01	yellow	0.466466	1
MsG0180001710.01	brown	0.648014	1
MsG0180001803.01	turquoise	0.293596	1
MsG0180001883.01	yellow	0.741156	1
MsG0180001884.01	blue	0.321434	1
MsG0180001937.01	greenyellow	0.776954	1
MsG0180001991.01	brown	0.375953	1
MsG0180002023.01	brown	0.607883	1
MsG0180001712.01	turquoise	0.865486	1
MsG0180001719.01	brown	0.671849	1
MsG0180001721.01	brown	0.72646	1
MsG0180001801.01	turquoise	0.374538	1
MsG0180001873.01	blue	0.143169	1
MsG0180001919.01	green	0.790617	1
MsG0180001939.01	blue	0.727146	1
MsG0180001990.01	blue	0.0898991	1
MsG0180002006.01	turquoise	0.381164	1
MsG0180002042.01	blue	0.545466	1
MsG0180002135.01	brown	0.554809	1
MsG0180001722.01	blue	0.738519	1
MsG0180001729.01	turquoise	0.429199	1
MsG0180001917.01	blue	0.779547	1
MsG0180001921.01	turquoise	0.871055	1
MsG0180001926.01	brown	0.354175	1
MsG0180001927.01	turquoise	0.514586	1
MsG0180001995.01	blue	0.320989	1
MsG0180002052.01	turquoise	0.401043	1
MsG0180002136.01	turquoise	0.769817	1
MsG0180002138.01	turquoise	0.641847	1
MsG0180001717.01	turquoise	0.66712	1
MsG0180001772.01	blue	0.841833	1
MsG0180001664.01	blue	0.783581	1
MsG0180001938.01	turquoise	0.780326	1
MsG0180001956.01	brown	0.566925	1
MsG0180001972.01	blue	0.697073	1
MsG0180001977.01	blue	0.20759	1
MsG0180001786.01	greenyellow	0.846135	1
MsG0180001804.01	turquoise	0.957026	1
MsG0180001868.01	turquoise	0.806153	1
MsG0180001928.01	blue	0.853644	1
MsG0180001934.01	turquoise	0.428784	1
MsG0180001971.01	turquoise	0.558991	1
MsG0180002007.01	yellow	0.400369	1
MsG0180002019.01	yellow	0.54099	1
MsG0180001827.01	blue	0.857069	1
MsG0180001834.01	turquoise	0.693539	1
MsG0180001886.01	blue	0.400726	1
MsG0180001935.01	brown	0.245773	1
MsG0180002024.01	blue	0.89104	1
MsG0180002098.01	blue	0.551121	1
MsG0180001726.01	blue	0.456434	1
MsG0180001841.01	turquoise	0.270119	1
MsG0180001864.01	brown	0.462467	1
MsG0180002090.01	turquoise	0.274493	1
MsG0180001728.01	turquoise	0.753758	1
MsG0180001856.01	green	0.353284	1
MsG0180001916.01	turquoise	0.874951	1
MsG0180001993.01	blue	0.670327	1
MsG0180002068.01	turquoise	0.805267	1
MsG0180001690.01	turquoise	0.52343	1
MsG0180001724.01	brown	0.644496	1
MsG0180001795.01	yellow	0.70298	1
MsG0180001828.01	blue	0.859641	1
MsG0180002088.01	turquoise	0.588869	1
MsG0180001720.01	turquoise	0.808348	1
MsG0180001802.01	turquoise	0.129235	1
MsG0180001892.01	blue	0.824049	1
MsG0180001933.01	tan	0.872873	1
MsG0180002083.01	turquoise	0.788322	1
MsG0180002148.01	brown	0.673685	1
MsG0180001691.01	turquoise	0.572761	1
MsG0180001785.01	turquoise	0.947826	1
MsG0180001807.01	blue	0.601359	1
MsG0180001978.01	brown	0.611204	1
MsG0180002077.01	brown	0.365012	1
MsG0180002086.01	turquoise	0.369128	1
MsG0180001656.01	yellow	0.712898	1
MsG0180001775.01	turquoise	0.983451	1
MsG0180001940.01	turquoise	0.826614	1
MsG0180001988.01	brown	0.738295	1
MsG0180001711.01	brown	0.859393	1
MsG0180002085.01	brown	0.541113	1
MsG0180002189.01	brown	0.46936	1
MsG0180002221.01	blue	0.625083	1
MsG0180002229.01	blue	0.530108	1
MsG0180002272.01	turquoise	0.751278	1
MsG0180002314.01	blue	0.229737	1
MsG0180002324.01	turquoise	0.849428	1
MsG0180002404.01	blue	0.531307	1
MsG0180002462.01	blue	0.617827	1
MsG0180002546.01	blue	0.279725	1
MsG0180002184.01	blue	0.424294	1
MsG0180002237.01	green	0.645115	1
MsG0180002433.01	blue	0.174431	1
MsG0180002477.01	turquoise	0.413153	1
MsG0180002556.01	brown	0.577275	1
MsG0180002183.01	turquoise	0.509631	1
MsG0180002187.01	turquoise	0.807615	1
MsG0180002319.01	pink	0.858367	1
MsG0180002362.01	tan	0.914345	1
MsG0180002451.01	brown	0.393329	1
MsG0180002211.01	turquoise	-0.116876	1
MsG0180002271.01	turquoise	0.743581	1
MsG0180002315.01	turquoise	0.336471	1
MsG0180002361.01	green	0.604224	1
MsG0180002394.01	turquoise	0.861786	1
MsG0180002524.01	turquoise	0.695669	1
MsG0180002585.01	turquoise	0.762686	1
MsG0180002227.01	yellow	0.282496	1
MsG0180002278.01	yellow	0.76959	1
MsG0180002443.01	blue	0.383668	1
MsG0180002251.01	turquoise	0.672954	1
MsG0180002365.01	blue	0.262544	1
MsG0180002458.01	yellow	0.418765	1
MsG0180002222.01	blue	0.188579	1
MsG0180002248.01	brown	0.28302	1
MsG0180002349.01	turquoise	0.273838	1
MsG0180002409.01	brown	0.823104	1
MsG0180002428.01	brown	0.771271	1
MsG0180002429.01	blue	0.530449	1
MsG0180002454.01	blue	0.708428	1
MsG0180002459.01	black	0.87051	1
MsG0180002461.01	brown	0.873604	1
MsG0180002255.01	turquoise	0.878557	1
MsG0180002335.01	turquoise	0.788247	1
MsG0180002425.01	blue	0.769091	1
MsG0180002439.01	red	0.930006	1
MsG0180002472.01	yellow	0.877782	1
MsG0180002506.01	yellow	0.834583	1
MsG0180002214.01	blue	0.751718	1
MsG0180002298.01	turquoise	0.635297	1
MsG0180002247.01	yellow	0.278064	1
MsG0180002270.01	turquoise	0.829158	1
MsG0180002322.01	turquoise	0.743655	1
MsG0180002325.01	turquoise	0.816319	1
MsG0180002199.01	brown	0.61655	1
MsG0180002418.01	brown	0.455267	1
MsG0180002482.01	brown	0.0638804	1
MsG0180002583.01	turquoise	0.290844	1
MsG0180002213.01	brown	0.0801145	1
MsG0180002249.01	turquoise	0.66936	1
MsG0180002273.01	turquoise	0.686921	1
MsG0180002463.01	black	0.817204	1
MsG0180002376.01	turquoise	0.684465	1
MsG0180002417.01	yellow	0.595665	1
MsG0180002649.01	green	0.29067	1
MsG0180002501.01	turquoise	0.434796	1
MsG0180002302.01	yellow	0.417866	1
MsG0180002316.01	turquoise	0.477072	1
MsG0180002453.01	blue	0.817682	1
MsG0180002545.01	brown	0.726307	1
MsG0180002586.01	turquoise	0.192512	1
MsG0180002182.01	brown	0.746702	1
MsG0180002226.01	yellow	0.582106	1
MsG0180002326.01	turquoise	0.494013	1
MsG0180002397.01	brown	0.823222	1
MsG0180002207.01	blue	0.839882	1
MsG0180002210.01	blue	0.460555	1
MsG0180002218.01	brown	0.783251	1
MsG0180002250.01	yellow	0.549246	1
MsG0180002441.01	blue	0.711518	1
MsG0180002381.01	brown	0.416414	1
MsG0180002399.01	yellow	0.716532	1
MsG0180002421.01	turquoise	0.564339	1
MsG0180002424.01	yellow	0.510914	1
MsG0180002438.01	yellow	0.55024	1
MsG0180002492.01	blue	0.660971	1
MsG0180002502.01	yellow	0.844838	1
MsG0180002534.01	yellow	0.590517	1
MsG0180002668.01	brown	0.625432	1
MsG0180002669.01	yellow	0.417018	1
MsG0180002665.01	blue	0.374968	1
MsG0180002700.01	brown	0.732674	1
MsG0180002984.01	brown	0.681647	1
MsG0180003067.01	yellow	0.30874	1
MsG0180002799.01	turquoise	0.3215	1
MsG0180002891.01	brown	0.255834	1
MsG0180002897.01	turquoise	0.149738	1
MsG0180002900.01	blue	0.528656	1
MsG0180002935.01	turquoise	0.919827	1
MsG0180002737.01	turquoise	0.774526	1
MsG0180002857.01	blue	0.499307	1
MsG0180002869.01	yellow	0.73154	1
MsG0180002902.01	blue	0.922915	1
MsG0180002931.01	brown	0.87478	1
MsG0180002936.01	brown	0.6353	1
MsG0180002948.01	blue	0.569699	1
MsG0180002694.01	magenta	0.703483	1
MsG0180002800.01	brown	0.768358	1
MsG0180002807.01	turquoise	0.717153	1
MsG0180003062.01	yellow	0.583863	1
MsG0180003084.01	brown	0.642297	1
MsG0180002906.01	brown	0.822458	1
MsG0180003150.01	yellow	0.770398	1
MsG0180003029.01	blue	0.613739	1
MsG0180003103.01	turquoise	-0.105069	1
MsG0180003113.01	yellow	0.729455	1
MsG0180003130.01	turquoise	0.951199	1
MsG0180003145.01	brown	0.593414	1
MsG0180002749.01	yellow	0.77965	1
MsG0180002794.01	turquoise	0.544836	1
MsG0180002796.01	yellow	-0.110952	1
MsG0180003020.01	yellow	0.48797	1
MsG0180003072.01	brown	0.611759	1
MsG0180003093.01	tan	0.903674	1
MsG0180003094.01	brown	0.667731	1
MsG0180003116.01	turquoise	0.204452	1
MsG0180003146.01	blue	0.956485	1
MsG0180002664.01	yellow	0.352891	1
MsG0180002720.01	blue	0.0627469	1
MsG0180002812.01	yellow	0.532297	1
MsG0180003019.01	yellow	0.408441	1
MsG0180003057.01	blue	-0.120728	1
MsG0180003128.01	yellow	0.670198	1
MsG0180002678.01	yellow	0.602285	1
MsG0180002808.01	turquoise	0.808932	1
MsG0180002672.01	greenyellow	0.89422	1
MsG0180002830.01	brown	0.85536	1
MsG0180002716.01	blue	0.701419	1
MsG0180002993.01	turquoise	0.216899	1
MsG0180003028.01	black	0.63192	1
MsG0180002894.01	turquoise	0.594297	1
MsG0180002971.01	turquoise	0.908703	1
MsG0180003079.01	yellow	0.465819	1
MsG0180003080.01	yellow	0.50675	1
MsG0180003032.01	blue	0.536139	1
MsG0180003036.01	brown	0.533535	1
MsG0180003129.01	yellow	0.615694	1
MsG0180003010.01	brown	0.485982	1
MsG0180003018.01	brown	0.577082	1
MsG0180002666.01	blue	0.377636	1
MsG0180003102.01	turquoise	0.78766	1
MsG0180003107.01	blue	0.237659	1
MsG0180002883.01	yellow	0.609988	1
MsG0180002912.01	turquoise	0.840275	1
MsG0180002929.01	blue	0.642831	1
MsG0180003030.01	turquoise	0.456997	1
MsG0180003051.01	turquoise	0.207449	1
MsG0180003097.01	yellow	0.349943	1
MsG0180003124.01	blue	0.472717	1
MsG0180003142.01	turquoise	0.256564	1
MsG0180002714.01	brown	0.9086	1
MsG0180002901.01	blue	0.366542	1
MsG0180003083.01	blue	0.655927	1
MsG0180002809.01	blue	0.823568	1
MsG0180002811.01	yellow	0.278511	1
MsG0180002895.01	turquoise	0.560018	1
MsG0180002924.01	yellow	0.764592	1
MsG0180002978.01	blue	0.590927	1
MsG0180003033.01	blue	0.656984	1
MsG0180003041.01	brown	0.582923	1
MsG0180003068.01	yellow	0.618061	1
MsG0180002679.01	brown	0.720269	1
MsG0180002868.01	yellow	0.866512	1
MsG0180002908.01	blue	0.819111	1
MsG0180003065.01	yellow	0.424682	1
MsG0180003114.01	blue	0.931351	1
MsG0180003163.01	yellow	0.658756	1
MsG0180003179.01	blue	0.61667	1
MsG0180003161.01	blue	0.434848	1
MsG0180003168.01	brown	0.836921	1
MsG0180003157.01	turquoise	0.94889	1
MsG0180003241.01	turquoise	0.940178	1
MsG0180003248.01	turquoise	0.964612	1
MsG0180003375.01	turquoise	0.883528	1
MsG0180003410.01	yellow	0.318939	1
MsG0180003468.01	turquoise	0.533445	1
MsG0180003510.01	turquoise	0.98037	1
MsG0180003548.01	blue	0.744457	1
MsG0180003592.01	turquoise	0.180191	1
MsG0180003595.01	turquoise	0.215009	1
MsG0180003651.01	brown	0.774213	1
MsG0180003243.01	turquoise	0.664369	1
MsG0180003254.01	pink	0.896472	1
MsG0180003256.01	blue	-0.0176462	1
MsG0180003306.01	turquoise	0.548183	1
MsG0180003350.01	blue	0.826413	1
MsG0180003371.01	turquoise	0.787647	1
MsG0180003383.01	blue	0.711572	1
MsG0180003403.01	blue	0.662315	1
MsG0180003435.01	blue	0.6618	1
MsG0180003494.01	brown	0.771194	1
MsG0180003495.01	blue	0.568579	1
MsG0180003532.01	turquoise	-0.1247	1
MsG0180003568.01	blue	0.795186	1
MsG0180003580.01	brown	0.459631	1
MsG0180003187.01	yellow	0.804164	1
MsG0180003189.01	brown	0.296099	1
MsG0180003240.01	turquoise	0.967199	1
MsG0180003347.01	blue	0.273534	1
MsG0180003358.01	blue	0.313613	1
MsG0180003421.01	turquoise	0.449769	1
MsG0180003423.01	turquoise	0.818339	1
MsG0180003523.01	turquoise	0.684694	1
MsG0180003567.01	brown	0.944794	1
MsG0180003633.01	blue	0.789463	1
MsG0180003235.01	turquoise	0.645532	1
MsG0180003282.01	blue	0.878266	1
MsG0180003391.01	blue	0.838014	1
MsG0180003404.01	turquoise	0.916056	1
MsG0180003455.01	brown	0.734303	1
MsG0180003467.01	magenta	0.687304	1
MsG0180003497.01	blue	0.738381	1
MsG0180003534.01	turquoise	0.844438	1
MsG0180003611.01	brown	0.557409	1
MsG0180003250.01	turquoise	0.965527	1
MsG0180003317.01	turquoise	0.93809	1
MsG0180003405.01	blue	0.938384	1
MsG0180003412.01	brown	0.94456	1
MsG0180003444.01	blue	0.610292	1
MsG0180003450.01	turquoise	0.526978	1
MsG0180003464.01	brown	0.390847	1
MsG0180003483.01	turquoise	0.52953	1
MsG0180003538.01	blue	0.358763	1
MsG0180003553.01	blue	0.715192	1
MsG0180003298.01	blue	0.792117	1
MsG0180003484.01	turquoise	0.564794	1
MsG0180003525.01	turquoise	0.782173	1
MsG0180003601.01	turquoise	0.901013	1
MsG0180003617.01	blue	0.987191	1
MsG0180003275.01	turquoise	0.662944	1
MsG0180003294.01	turquoise	0.940612	1
MsG0180003322.01	turquoise	0.749234	1
MsG0180003330.01	yellow	0.150166	1
MsG0180003572.01	blue	0.617171	1
MsG0180003252.01	turquoise	0.81934	1
MsG0180003302.01	blue	0.391778	1
MsG0180003357.01	turquoise	0.837571	1
MsG0180003359.01	turquoise	0.883405	1
MsG0180003370.01	blue	0.561284	1
MsG0180003482.01	turquoise	0.677318	1
MsG0180003505.01	turquoise	0.531878	1
MsG0180003513.01	brown	0.682927	1
MsG0180003539.01	turquoise	0.530828	1
MsG0180003249.01	turquoise	0.941843	1
MsG0180003345.01	yellow	0.496704	1
MsG0180003496.01	blue	0.614839	1
MsG0180003533.01	turquoise	0.769903	1
MsG0180003582.01	blue	0.75368	1
MsG0180003622.01	blue	0.884815	1
MsG0180003624.01	brown	0.589655	1
MsG0180003629.01	turquoise	0.938109	1
MsG0180003281.01	brown	0.577709	1
MsG0180003377.01	brown	0.699739	1
MsG0180003451.01	yellow	0.709205	1
MsG0180003586.01	turquoise	0.233448	1
MsG0180003604.01	turquoise	0.900752	1
MsG0180003620.01	brown	0.459858	1
MsG0180003226.01	yellow	0.290994	1
MsG0180003292.01	yellow	0.700971	1
MsG0180003430.01	pink	0.938935	1
MsG0180003504.01	turquoise	0.640317	1
MsG0180003194.01	turquoise	0.878969	1
MsG0180003237.01	turquoise	0.584578	1
MsG0180003193.01	turquoise	0.493035	1
MsG0180003332.01	pink	0.687596	1
MsG0180003346.01	yellow	0.616653	1
MsG0180003352.01	turquoise	0.496918	1
MsG0180003413.01	turquoise	0.215093	1
MsG0180003453.01	blue	0.882529	1
MsG0180003449.01	yellow	0.643596	1
MsG0180003462.01	turquoise	0.315067	1
MsG0180003492.01	turquoise	0.251554	1
MsG0180003526.01	blue	0.663084	1
MsG0180003531.01	blue	0.915073	1
MsG0180003542.01	turquoise	0.765513	1
MsG0180003573.01	brown	0.873789	1
MsG0180003634.01	turquoise	0.680266	1
MsG0180003590.01	turquoise	0.907591	1
MsG0180003605.01	turquoise	0.50692	1
MsG0180003649.01	red	0.780314	1
MsG0180003173.01	red	0.694345	1
MsG0180003246.01	blue	0.573025	1
MsG0180003268.01	blue	0.839785	1
MsG0180003178.01	turquoise	0.388285	1
MsG0180003353.01	blue	0.86285	1
MsG0180003363.01	brown	0.274483	1
MsG0180003190.01	turquoise	0.844393	1
MsG0180003207.01	turquoise	0.863299	1
MsG0180003214.01	brown	0.748482	1
MsG0180003443.01	brown	0.607185	1
MsG0180003276.01	turquoise	0.262772	1
MsG0180003578.01	turquoise	0.837713	1
MsG0180003599.01	turquoise	0.10364	1
MsG0180003428.01	yellow	0.606116	1
MsG0180003493.01	blue	0.80746	1
MsG0180003498.01	blue	0.859808	1
MsG0180003499.01	brown	0.783301	1
MsG0180003547.01	blue	0.928366	1
MsG0180003565.01	yellow	0.577111	1
MsG0180003602.01	yellow	0.26233	1
MsG0180003174.01	blue	0.212587	1
MsG0180003175.01	blue	0.528275	1
MsG0180003314.01	blue	0.721576	1
MsG0180003338.01	turquoise	0.908503	1
MsG0180003361.01	brown	0.75805	1
MsG0180003470.01	turquoise	0.653076	1
MsG0180003485.01	brown	0.801861	1
MsG0180003524.01	turquoise	0.619411	1
MsG0180003594.01	turquoise	0.390031	1
MsG0180003606.01	yellow	0.300758	1
MsG0180003688.01	brown	0.593028	1
MsG0180003690.01	turquoise	0.722387	1
MsG0180003658.01	brown	0.751467	1
MsG0180003713.01	turquoise	0.487013	1
MsG0180003762.01	blue	-0.0660823	1
MsG0180003768.01	yellow	0.404457	1
MsG0180003879.01	turquoise	0.692115	1
MsG0180003886.01	blue	0.831977	1
MsG0180004091.01	blue	0.348671	1
MsG0180004106.01	turquoise	0.522867	1
MsG0180003953.01	brown	0.737031	1
MsG0180003982.01	magenta	0.664875	1
MsG0180004124.01	red	0.763761	1
MsG0180004146.01	brown	0.59701	1
MsG0180004151.01	yellow	0.616278	1
MsG0180003710.01	turquoise	0.820926	1
MsG0180003758.01	blue	0.944476	1
MsG0180003810.01	brown	0.528336	1
MsG0180003830.01	turquoise	0.892231	1
MsG0180003905.01	blue	0.438579	1
MsG0180003907.01	turquoise	0.631541	1
MsG0180003956.01	turquoise	0.367323	1
MsG0180004010.01	brown	0.564346	1
MsG0180004026.01	blue	0.0232667	1
MsG0180004070.01	brown	0.845638	1
MsG0180004143.01	brown	0.854759	1
MsG0180003695.01	blue	0.880778	1
MsG0180003779.01	blue	0.858466	1
MsG0180003869.01	pink	0.850695	1
MsG0180003921.01	blue	0.58854	1
MsG0180003939.01	turquoise	0.832861	1
MsG0180003978.01	blue	0.247133	1
MsG0180004006.01	blue	0.960685	1
MsG0180004025.01	brown	0.738533	1
MsG0180004083.01	blue	0.756242	1
MsG0180004099.01	turquoise	0.601448	1
MsG0180004121.01	turquoise	0.957478	1
MsG0180003670.01	turquoise	0.705346	1
MsG0180003693.01	brown	0.887267	1
MsG0180003815.01	blue	0.550922	1
MsG0180003848.01	turquoise	0.895877	1
MsG0180003849.01	turquoise	0.828091	1
MsG0180003888.01	blue	0.952462	1
MsG0180003913.01	blue	0.394353	1
MsG0180004088.01	blue	0.766431	1
MsG0180004102.01	yellow	0.644973	1
MsG0180004114.01	blue	0.269525	1
MsG0180003752.01	brown	0.831962	1
MsG0180003780.01	blue	0.903286	1
MsG0180003805.01	brown	0.692964	1
MsG0180003862.01	turquoise	0.357545	1
MsG0180003948.01	brown	0.77525	1
MsG0180003992.01	turquoise	0.793157	1
MsG0180004067.01	turquoise	0.958699	1
MsG0180004068.01	turquoise	0.87012	1
MsG0180004104.01	turquoise	0.869932	1
MsG0180004110.01	turquoise	0.7057	1
MsG0180004152.01	yellow	0.696553	1
MsG0180003672.01	turquoise	0.759292	1
MsG0180003707.01	turquoise	0.41587	1
MsG0180003765.01	green	0.324129	1
MsG0180003785.01	brown	0.635375	1
MsG0180003792.01	yellow	0.728018	1
MsG0180004017.01	yellow	0.587354	1
MsG0180003726.01	brown	0.404159	1
MsG0180004020.01	red	0.671985	1
MsG0180004063.01	brown	0.579796	1
MsG0180004108.01	turquoise	0.709256	1
MsG0180003859.01	turquoise	0.494247	1
MsG0180003943.01	brown	0.77127	1
MsG0180003954.01	blue	0.474179	1
MsG0180003965.01	turquoise	0.5336	1
MsG0180003993.01	turquoise	0.798148	1
MsG0180004045.01	brown	0.549012	1
MsG0180004061.01	yellow	0.140074	1
MsG0180004094.01	blue	0.646783	1
MsG0180004115.01	blue	0.628621	1
MsG0180003712.01	turquoise	0.724873	1
MsG0180003730.01	yellow	0.917445	1
MsG0180003753.01	brown	0.651228	1
MsG0180003820.01	brown	0.938244	1
MsG0180003876.01	turquoise	0.808749	1
MsG0180004095.01	blue	0.184577	1
MsG0180004126.01	brown	0.789624	1
MsG0180004136.01	brown	0.694762	1
MsG0180003697.01	blue	0.545281	1
MsG0180003719.01	blue	0.587348	1
MsG0180003746.01	turquoise	0.0688758	1
MsG0180003772.01	turquoise	0.512355	1
MsG0180003802.01	blue	0.25848	1
MsG0180003858.01	turquoise	0.891379	1
MsG0180003900.01	yellow	0.278125	1
MsG0180003911.01	blue	0.536157	1
MsG0180003959.01	green	0.753271	1
MsG0180003798.01	turquoise	0.554592	1
MsG0180003986.01	blue	0.691791	1
MsG0180003808.01	yellow	0.319183	1
MsG0180004018.01	blue	0.872295	1
MsG0180004046.01	blue	0.798169	1
MsG0180004051.01	brown	0.803593	1
MsG0180004053.01	turquoise	0.679604	1
MsG0180003865.01	blue	0.827291	1
MsG0180004065.01	turquoise	0.484933	1
MsG0180003878.01	brown	0.610743	1
MsG0180003910.01	brown	0.378643	1
MsG0180004116.01	blue	0.13878	1
MsG0180003951.01	brown	0.88612	1
MsG0180004154.01	tan	0.88194	1
MsG0180003985.01	blue	0.776344	1
MsG0180004012.01	blue	0.790264	1
MsG0180004028.01	blue	0.699472	1
MsG0180004044.01	blue	0.647681	1
MsG0180004057.01	blue	0.696467	1
MsG0180004058.01	turquoise	0.0766567	1
MsG0180004120.01	brown	0.76347	1
MsG0180003656.01	blue	0.518851	1
MsG0180003673.01	brown	0.64947	1
MsG0180003698.01	brown	0.845612	1
MsG0180003784.01	brown	0.583892	1
MsG0180003796.01	turquoise	0.76261	1
MsG0180003989.01	blue	0.578438	1
MsG0180003699.01	brown	0.69349	1
MsG0180004009.01	brown	0.702843	1
MsG0180003741.01	brown	0.784921	1
MsG0180004021.01	yellow	0.393096	1
MsG0180004027.01	turquoise	0.542796	1
MsG0180003791.01	blue	0.915677	1
MsG0180003872.01	blue	0.407376	1
MsG0180004056.01	blue	0.786489	1
MsG0180003874.01	turquoise	0.858233	1
MsG0180003912.01	brown	0.0431701	1
MsG0180004090.01	blue	0.420126	1
MsG0180003915.01	blue	0.435416	1
MsG0180003945.01	brown	0.796347	1
MsG0180003983.01	brown	0.939584	1
MsG0180004037.01	brown	0.652177	1
MsG0180004060.01	turquoise	0.906254	1
MsG0180004079.01	turquoise	0.903598	1
MsG0180003696.01	brown	0.740318	1
MsG0180003711.01	turquoise	0.639251	1
MsG0180003932.01	brown	0.549902	1
MsG0180003971.01	blue	0.455737	1
MsG0180003975.01	brown	0.735545	1
MsG0180004014.01	brown	0.76056	1
MsG0180004112.01	turquoise	0.794917	1
MsG0180003729.01	blue	0.756284	1
MsG0180003736.01	blue	0.70455	1
MsG0180003854.01	yellow	0.327566	1
MsG0180003885.01	blue	0.583988	1
MsG0180003890.01	blue	0.391496	1
MsG0180003928.01	blue	0.795484	1
MsG0180003955.01	green	0.560993	1
MsG0180003987.01	yellow	0.471879	1
MsG0180004048.01	blue	0.354264	1
MsG0180004103.01	blue	0.947433	1
MsG0180004105.01	turquoise	0.578666	1
MsG0180004148.01	blue	0.805453	1
MsG0180003687.01	turquoise	0.580358	1
MsG0180003689.01	turquoise	0.64914	1
MsG0180003727.01	brown	0.495006	1
MsG0180003754.01	blue	0.861671	1
MsG0180003756.01	blue	0.585041	1
MsG0180003795.01	turquoise	0.391517	1
MsG0180003817.01	turquoise	0.937052	1
MsG0180003857.01	brown	0.543441	1
MsG0180003901.01	yellow	0.308575	1
MsG0180003998.01	yellow	0.497272	1
MsG0180003999.01	green	0.508724	1
MsG0180004049.01	brown	0.90753	1
MsG0180004066.01	blue	0.396107	1
MsG0180004111.01	turquoise	0.265185	1
MsG0180004132.01	brown	0.956574	1
MsG0180004147.01	turquoise	0.974036	1
MsG0180004150.01	turquoise	0.839399	1
MsG0180004215.01	brown	0.283492	1
MsG0180004182.01	blue	0.130205	1
MsG0180004166.01	green	0.805499	1
MsG0180004177.01	blue	0.886237	1
MsG0180004164.01	green	0.546298	1
MsG0180004173.01	turquoise	0.873442	1
MsG0180004232.01	turquoise	0.818716	1
MsG0180004249.01	brown	0.561459	1
MsG0180004312.01	blue	0.944794	1
MsG0180004357.01	turquoise	0.734717	1
MsG0180004400.01	turquoise	0.479764	1
MsG0180004537.01	turquoise	0.584891	1
MsG0180004597.01	turquoise	0.636117	1
MsG0180004520.01	blue	0.194363	1
MsG0180004554.01	blue	0.933862	1
MsG0180004223.01	blue	0.381043	1
MsG0180004246.01	brown	0.6838	1
MsG0180004332.01	brown	0.538156	1
MsG0180004371.01	turquoise	0.496188	1
MsG0180004375.01	blue	0.714687	1
MsG0180004532.01	turquoise	0.777243	1
MsG0180004562.01	turquoise	0.94303	1
MsG0180004599.01	blue	0.693443	1
MsG0180004193.01	brown	0.28286	1
MsG0180004207.01	blue	0.39002	1
MsG0180004263.01	yellow	0.700723	1
MsG0180004202.01	turquoise	0.925504	1
MsG0180004266.01	turquoise	0.0320345	1
MsG0180004302.01	blue	0.761346	1
MsG0180004304.01	blue	0.826931	1
MsG0180004259.01	brown	0.292462	1
MsG0180004308.01	yellow	0.543115	1
MsG0180004262.01	turquoise	0.929376	1
MsG0180004269.01	turquoise	0.875375	1
MsG0180004272.01	turquoise	0.446111	1
MsG0180004387.01	yellow	0.425866	1
MsG0180004278.01	brown	0.621699	1
MsG0180004413.01	yellow	0.490475	1
MsG0180004281.01	turquoise	0.75982	1
MsG0180004295.01	brown	0.82015	1
MsG0180004529.01	blue	0.165332	1
MsG0180004326.01	turquoise	0.911195	1
MsG0180004564.01	blue	0.86475	1
MsG0180004424.01	turquoise	0.785434	1
MsG0180004634.01	blue	0.328596	1
MsG0180004448.01	yellow	0.599233	1
MsG0180004451.01	turquoise	0.495532	1
MsG0180004502.01	yellow	0.587098	1
MsG0180004277.01	turquoise	0.601322	1
MsG0180004329.01	brown	0.803116	1
MsG0180004347.01	brown	0.465511	1
MsG0180004491.01	turquoise	0.776381	1
MsG0180004499.01	blue	0.361996	1
MsG0180004600.01	yellow	0.562836	1
MsG0180004610.01	turquoise	0.00966652	1
MsG0180004617.01	turquoise	0.527885	1
MsG0180004624.01	turquoise	0.562665	1
MsG0180004633.01	turquoise	0.705992	1
MsG0180004203.01	turquoise	0.893626	1
MsG0180004274.01	blue	0.856577	1
MsG0180004435.01	red	0.710122	1
MsG0180004505.01	yellow	0.49577	1
MsG0180004543.01	brown	0.305889	1
MsG0180004579.01	blue	0.842751	1
MsG0180004626.01	turquoise	0.0302589	1
MsG0180004333.01	brown	0.825744	1
MsG0180004353.01	blue	0.587124	1
MsG0180004393.01	turquoise	0.91849	1
MsG0180004419.01	blue	0.671766	1
MsG0180004492.01	blue	0.85604	1
MsG0180004541.01	blue	0.881381	1
MsG0180004622.01	turquoise	0.287516	1
MsG0180004625.01	brown	0.423381	1
MsG0180004183.01	blue	0.636335	1
MsG0180004222.01	yellow	0.46675	1
MsG0180004235.01	blue	0.730254	1
MsG0180004299.01	brown	0.809521	1
MsG0180004335.01	yellow	0.661339	1
MsG0180004349.01	blue	0.446453	1
MsG0180004381.01	blue	0.649732	1
MsG0180004386.01	blue	0.787899	1
MsG0180004449.01	yellow	-0.00666813	1
MsG0180004453.01	turquoise	0.579917	1
MsG0180004471.01	brown	0.806912	1
MsG0180004483.01	purple	0.853749	1
MsG0180004185.01	brown	0.819018	1
MsG0180004560.01	turquoise	0.914042	1
MsG0180004292.01	red	0.864322	1
MsG0180004596.01	turquoise	0.283675	1
MsG0180004243.01	yellow	0.701178	1
MsG0180004602.01	yellow	0.712841	1
MsG0180004244.01	yellow	0.558068	1
MsG0180004426.01	turquoise	0.691443	1
MsG0180004293.01	turquoise	0.516559	1
MsG0180004294.01	turquoise	-0.0769296	1
MsG0180004311.01	blue	0.841334	1
MsG0180004472.01	blue	0.807439	1
MsG0180004351.01	blue	0.366571	1
MsG0180004495.01	turquoise	0.692034	1
MsG0180004168.01	turquoise	0.810795	1
MsG0180004498.01	turquoise	0.784856	1
MsG0180004181.01	turquoise	0.463399	1
MsG0180004369.01	yellow	0.283261	1
MsG0180004192.01	blue	0.881023	1
MsG0180004507.01	brown	0.76776	1
MsG0180004511.01	turquoise	0.821994	1
MsG0180004436.01	brown	0.811325	1
MsG0180004522.01	yellow	0.766977	1
MsG0180004441.01	yellow	0.480158	1
MsG0180004445.01	turquoise	0.146362	1
MsG0180004542.01	blue	0.459692	1
MsG0180004189.01	blue	0.925209	1
MsG0180004497.01	blue	0.874677	1
MsG0180004500.01	blue	0.933439	1
MsG0180004509.01	brown	0.880156	1
MsG0180004524.01	yellow	0.685368	1
MsG0180004548.01	brown	0.965489	1
MsG0180004583.01	brown	0.778596	1
MsG0180004496.01	blue	0.957204	1
MsG0180004594.01	yellow	0.671067	1
MsG0180004563.01	turquoise	0.699858	1
MsG0180004258.01	turquoise	0.976919	1
MsG0180004506.01	blue	0.519283	1
MsG0180004595.01	brown	0.89345	1
MsG0180004603.01	yellow	0.64612	1
MsG0180004606.01	turquoise	0.887071	1
MsG0180004559.01	black	0.66346	1
MsG0180004270.01	yellow	0.770026	1
MsG0180004298.01	blue	0.793265	1
MsG0180004305.01	blue	0.79588	1
MsG0180004366.01	blue	0.549744	1
MsG0180004388.01	turquoise	0.893117	1
MsG0180004433.01	brown	0.671224	1
MsG0180004460.01	turquoise	0.49168	1
MsG0180004515.01	turquoise	0.862751	1
MsG0180004574.01	brown	0.311002	1
MsG0180004631.01	turquoise	0.412291	1
MsG0180004184.01	brown	0.549117	1
MsG0180004328.01	turquoise	0.855035	1
MsG0180004376.01	blue	0.742602	1
MsG0180004402.01	greenyellow	0.613386	1
MsG0180004412.01	turquoise	0.533107	1
MsG0180004415.01	yellow	0.598642	1
MsG0180004428.01	blue	0.900451	1
MsG0180004434.01	red	0.577311	1
MsG0180004452.01	green	0.550642	1
MsG0180004468.01	brown	0.497319	1
MsG0180004514.01	turquoise	0.471957	1
MsG0180004547.01	turquoise	0.892536	1
MsG0180004623.01	blue	0.317754	1
MsG0180004155.01	pink	0.876511	1
MsG0180004160.01	turquoise	0.747651	1
MsG0180004206.01	black	0.917839	1
MsG0180004286.01	turquoise	0.409865	1
MsG0180004352.01	blue	0.478153	1
MsG0180004354.01	turquoise	0.688446	1
MsG0180004370.01	brown	0.249638	1
MsG0180004378.01	yellow	0.922421	1
MsG0180004466.01	blue	0.814861	1
MsG0180004504.01	blue	0.968218	1
MsG0180004283.01	turquoise	0.912053	1
MsG0180004288.01	turquoise	0.929882	1
MsG0180004297.01	blue	0.562378	1
MsG0180004322.01	blue	0.891994	1
MsG0180004362.01	yellow	-0.0585036	1
MsG0180004457.01	yellow	0.812968	1
MsG0180004467.01	blue	0.789887	1
MsG0180004510.01	turquoise	0.895442	1
MsG0180004538.01	brown	0.558151	1
MsG0180004575.01	turquoise	0.847632	1
MsG0180004581.01	blue	0.717756	1
MsG0180004647.01	yellow	0.285698	1
MsG0180004669.01	blue	0.394122	1
MsG0180004656.01	yellow	0.298572	1
MsG0180004657.01	blue	0.34392	1
MsG0180004692.01	purple	0.797394	1
MsG0180004694.01	brown	0.884226	1
MsG0180004732.01	turquoise	0.922438	1
MsG0180004806.01	brown	0.876795	1
MsG0180004856.01	yellow	0.36925	1
MsG0180004886.01	blue	0.860412	1
MsG0180004925.01	turquoise	0.75293	1
MsG0180004965.01	turquoise	0.88708	1
MsG0180004972.01	brown	0.90228	1
MsG0180005047.01	brown	0.817361	1
MsG0180005051.01	turquoise	0.160543	1
MsG0180005052.01	yellow	0.88308	1
MsG0180005064.01	blue	0.782536	1
MsG0180005127.01	turquoise	0.915157	1
MsG0180005132.01	brown	0.502135	1
MsG0180005142.01	blue	0.619772	1
MsG0180004684.01	turquoise	0.659296	1
MsG0180004725.01	brown	0.824238	1
MsG0180004774.01	blue	0.778559	1
MsG0180004779.01	yellow	0.32029	1
MsG0180004780.01	yellow	0.483161	1
MsG0180004860.01	blue	0.864366	1
MsG0180004869.01	turquoise	0.605078	1
MsG0180004910.01	brown	0.144463	1
MsG0180004957.01	blue	0.762933	1
MsG0180004995.01	brown	0.901801	1
MsG0180005014.01	blue	0.693046	1
MsG0180004701.01	yellow	0.713161	1
MsG0180004707.01	brown	0.75101	1
MsG0180004713.01	turquoise	0.719972	1
MsG0180004868.01	turquoise	0.623714	1
MsG0180004911.01	brown	0.381742	1
MsG0180004953.01	blue	0.51693	1
MsG0180005059.01	turquoise	0.679549	1
MsG0180005113.01	brown	0.768272	1
MsG0180005121.01	blue	0.641349	1
MsG0180005141.01	brown	0.840128	1
MsG0180004703.01	blue	0.791511	1
MsG0180004772.01	turquoise	0.865227	1
MsG0180004803.01	turquoise	0.36819	1
MsG0180004810.01	red	0.688957	1
MsG0180004834.01	yellow	0.966417	1
MsG0180004846.01	turquoise	0.899115	1
MsG0180004855.01	yellow	0.248102	1
MsG0180004880.01	turquoise	0.863242	1
MsG0180004915.01	blue	0.19409	1
MsG0180004918.01	greenyellow	0.839438	1
MsG0180004932.01	brown	0.0455746	1
MsG0180004944.01	brown	0.444712	1
MsG0180004987.01	blue	0.793772	1
MsG0180004997.01	yellow	0.425595	1
MsG0180005022.01	turquoise	0.657275	1
MsG0180005135.01	blue	0.893363	1
MsG0180004661.01	brown	0.828813	1
MsG0180004666.01	turquoise	0.933497	1
MsG0180004743.01	brown	0.455906	1
MsG0180004744.01	purple	0.46111	1
MsG0180004752.01	turquoise	0.888105	1
MsG0180004762.01	turquoise	0.981858	1
MsG0180004835.01	blue	0.674324	1
MsG0180004928.01	yellow	0.709951	1
MsG0180004933.01	tan	0.871959	1
MsG0180004951.01	turquoise	0.710889	1
MsG0180004958.01	turquoise	0.66431	1
MsG0180004970.01	turquoise	0.714152	1
MsG0180005007.01	brown	0.836598	1
MsG0180005021.01	turquoise	0.727815	1
MsG0180005054.01	turquoise	0.147102	1
MsG0180005061.01	turquoise	0.765685	1
MsG0180005076.01	turquoise	0.149293	1
MsG0180005083.01	turquoise	0.257358	1
MsG0180005089.01	yellow	0.755267	1
MsG0180005107.01	blue	0.512379	1
MsG0180005154.01	turquoise	0.416312	1
MsG0180004659.01	blue	0.657321	1
MsG0180004658.01	turquoise	0.909422	1
MsG0180004715.01	yellow	0.594739	1
MsG0180004770.01	yellow	0.487016	1
MsG0180004955.01	brown	0.676917	1
MsG0180004974.01	blue	0.578351	1
MsG0180004975.01	blue	0.695937	1
MsG0180005002.01	brown	0.826575	1
MsG0180005048.01	brown	0.793959	1
MsG0180005131.01	blue	0.620464	1
MsG0180005143.01	green	0.795218	1
MsG0180005153.01	brown	0.808482	1
MsG0180004662.01	yellow	0.606558	1
MsG0180004736.01	blue	0.358579	1
MsG0180004776.01	yellow	0.569733	1
MsG0180004805.01	blue	0.534918	1
MsG0180004817.01	blue	0.656508	1
MsG0180004879.01	turquoise	0.854445	1
MsG0180004940.01	turquoise	0.659976	1
MsG0180004942.01	turquoise	0.842944	1
MsG0180004976.01	brown	0.380672	1
MsG0180004978.01	blue	0.812284	1
MsG0180005039.01	blue	0.834907	1
MsG0180005049.01	brown	0.616759	1
MsG0180005065.01	turquoise	0.795766	1
MsG0180004704.01	turquoise	0.702292	1
MsG0180004769.01	blue	0.339668	1
MsG0180004790.01	blue	0.922728	1
MsG0180004816.01	yellow	0.302068	1
MsG0180004895.01	turquoise	0.811215	1
MsG0180004924.01	turquoise	0.934193	1
MsG0180004973.01	turquoise	0.426644	1
MsG0180005016.01	blue	0.898981	1
MsG0180005018.01	turquoise	0.914442	1
MsG0180005043.01	yellow	0.762183	1
MsG0180005150.01	turquoise	0.721985	1
MsG0180004691.01	brown	0.274364	1
MsG0180004724.01	brown	0.637149	1
MsG0180004800.01	turquoise	0.898419	1
MsG0180004981.01	blue	0.648073	1
MsG0180005005.01	blue	0.917597	1
MsG0180005031.01	blue	0.759324	1
MsG0180005063.01	blue	0.557703	1
MsG0180005080.01	turquoise	0.697453	1
MsG0180005130.01	green	0.755234	1
MsG0180005138.01	brown	0.516415	1
MsG0180004671.01	brown	0.728028	1
MsG0180004680.01	pink	0.825966	1
MsG0180004698.01	blue	0.272444	1
MsG0180004728.01	blue	0.500285	1
MsG0180004761.01	blue	0.882418	1
MsG0180004802.01	turquoise	0.725533	1
MsG0180004809.01	turquoise	0.824579	1
MsG0180004907.01	brown	0.944106	1
MsG0180005117.01	brown	0.641249	1
MsG0180004740.01	blue	0.215778	1
MsG0180004750.01	brown	0.733002	1
MsG0180004794.01	blue	0.590849	1
MsG0180004830.01	pink	0.853553	1
MsG0180004878.01	brown	0.41991	1
MsG0180004956.01	turquoise	0.674128	1
MsG0180004979.01	blue	0.926868	1
MsG0180005067.01	turquoise	0.390426	1
MsG0180005082.01	turquoise	0.72345	1
MsG0180004674.01	brown	0.76543	1
MsG0180004731.01	blue	0.332931	1
MsG0180004734.01	turquoise	0.946231	1
MsG0180004735.01	blue	0.92342	1
MsG0180004792.01	blue	0.91292	1
MsG0180004827.01	blue	0.593113	1
MsG0180004908.01	blue	0.737607	1
MsG0180004977.01	blue	0.685642	1
MsG0180005060.01	turquoise	0.845988	1
MsG0180005093.01	blue	0.257905	1
MsG0180005151.01	turquoise	0.299257	1
MsG0180004706.01	green	0.785385	1
MsG0180004733.01	blue	0.950147	1
MsG0180004749.01	brown	0.720745	1
MsG0180004765.01	turquoise	0.224776	1
MsG0180004771.01	black	0.753974	1
MsG0180004849.01	yellow	0.712522	1
MsG0180005096.01	turquoise	0.573683	1
MsG0180005119.01	yellow	0.352626	1
MsG0180005137.01	blue	0.933998	1
MsG0180004687.01	yellow	0.762593	1
MsG0180004689.01	turquoise	0.264065	1
MsG0180004699.01	turquoise	0.00633997	1
MsG0180004705.01	turquoise	0.31718	1
MsG0180004714.01	blue	0.927811	1
MsG0180004679.01	blue	0.571075	1
MsG0180004783.01	blue	0.490686	1
MsG0180004739.01	blue	0.944238	1
MsG0180004801.01	yellow	0.658973	1
MsG0180004851.01	yellow	0.789609	1
MsG0180004927.01	turquoise	0.682773	1
MsG0180004909.01	blue	0.918821	1
MsG0180004941.01	turquoise	0.609851	1
MsG0180004926.01	yellow	0.591439	1
MsG0180004917.01	yellow	0.751897	1
MsG0180004945.01	yellow	0.31504	1
MsG0180004967.01	blue	0.627736	1
MsG0180005023.01	turquoise	0.719445	1
MsG0180005025.01	turquoise	0.577218	1
MsG0180005038.01	brown	0.926843	1
MsG0180005045.01	turquoise	0.599431	1
MsG0180005087.01	blue	0.936113	1
MsG0180005104.01	brown	0.590491	1
MsG0180005108.01	turquoise	0.0274358	1
MsG0180005146.01	turquoise	0.961597	1
MsG0180005160.01	turquoise	0.480086	1
MsG0180005157.01	brown	0.688357	1
MsG0180005172.01	turquoise	0.923734	1
MsG0180005191.01	turquoise	0.912856	1
MsG0180005372.01	turquoise	0.868733	1
MsG0180005420.01	brown	0.662006	1
MsG0180005162.01	turquoise	0.726864	1
MsG0180005183.01	blue	0.715184	1
MsG0180005234.01	brown	0.866134	1
MsG0180005242.01	blue	0.888221	1
MsG0180005279.01	turquoise	0.850523	1
MsG0180005288.01	black	0.862949	1
MsG0180005336.01	brown	0.67445	1
MsG0180005424.01	turquoise	0.374053	1
MsG0180005480.01	brown	0.845723	1
MsG0180005499.01	yellow	0.403299	1
MsG0180005508.01	turquoise	0.833721	1
MsG0180005523.01	turquoise	0.43645	1
MsG0180005549.01	red	0.634273	1
MsG0180005571.01	turquoise	0.716717	1
MsG0180005584.01	turquoise	0.135644	1
MsG0180005621.01	green	0.544065	1
MsG0180005168.01	blue	0.552716	1
MsG0180005231.01	turquoise	0.800933	1
MsG0180005239.01	turquoise	0.89515	1
MsG0180005269.01	brown	0.793296	1
MsG0180005305.01	blue	0.523943	1
MsG0180005306.01	turquoise	0.229119	1
MsG0180005443.01	turquoise	0.383974	1
MsG0180005450.01	brown	0.57503	1
MsG0180005488.01	turquoise	0.477299	1
MsG0180005529.01	brown	0.658121	1
MsG0180005563.01	blue	0.864097	1
MsG0180005569.01	brown	0.838962	1
MsG0180005595.01	turquoise	0.706563	1
MsG0180005618.01	brown	0.696188	1
MsG0180005620.01	black	0.650984	1
MsG0180005221.01	turquoise	0.551063	1
MsG0180005353.01	turquoise	0.725284	1
MsG0180005416.01	brown	0.674271	1
MsG0180005419.01	turquoise	0.608445	1
MsG0180005439.01	brown	0.813034	1
MsG0180005503.01	yellow	0.823291	1
MsG0180005533.01	blue	0.523151	1
MsG0180005587.01	brown	0.857742	1
MsG0180005598.01	blue	0.839898	1
MsG0180005612.01	blue	0.638768	1
MsG0180005629.01	blue	-0.263212	1
MsG0180005636.01	turquoise	0.889185	1
MsG0180005220.01	yellow	0.610242	1
MsG0180005225.01	turquoise	0.912957	1
MsG0180005317.01	turquoise	0.727651	1
MsG0180005381.01	brown	0.36933	1
MsG0180005394.01	yellow	0.579449	1
MsG0180005408.01	turquoise	0.876995	1
MsG0180005414.01	blue	0.795591	1
MsG0180005448.01	yellow	0.386695	1
MsG0180005555.01	brown	0.749353	1
MsG0180005596.01	brown	0.622467	1
MsG0180005605.01	brown	0.504206	1
MsG0180005625.01	brown	0.668153	1
MsG0180005200.01	blue	0.522578	1
MsG0180005229.01	yellow	0.7026	1
MsG0180005267.01	turquoise	0.817252	1
MsG0180005358.01	turquoise	0.894222	1
MsG0180005449.01	turquoise	0.65011	1
MsG0180005473.01	yellow	0.271179	1
MsG0180005483.01	turquoise	0.689065	1
MsG0180005534.01	yellow	0.355449	1
MsG0180005548.01	brown	0.774676	1
MsG0180005553.01	turquoise	0.476182	1
MsG0180005558.01	blue	0.687457	1
MsG0180005562.01	blue	0.793883	1
MsG0180005648.01	turquoise	0.765437	1
MsG0180005233.01	turquoise	0.61035	1
MsG0180005219.01	turquoise	0.608466	1
MsG0180005271.01	yellow	0.835737	1
MsG0180005277.01	blue	0.855882	1
MsG0180005311.01	brown	0.0369137	1
MsG0180005400.01	blue	0.898839	1
MsG0180005374.01	blue	0.538824	1
MsG0180005516.01	blue	0.928688	1
MsG0180005391.01	blue	0.195652	1
MsG0180005421.01	blue	0.883066	1
MsG0180005565.01	blue	0.945437	1
MsG0180005576.01	brown	0.893767	1
MsG0180005479.01	blue	0.854922	1
MsG0180005615.01	brown	0.47589	1
MsG0180005519.01	turquoise	0.750227	1
MsG0180005603.01	blue	0.417514	1
MsG0180005256.01	blue	0.654177	1
[truncated: 11,563 more rows]
