# Supplementary material for: Identification of Salt-Responsive Genes in Melatonin Regulated Alfalfa Salt Tolerance by Transcriptome Analysis
Source: Preprints.org preprint supplement (doi:10.20944/preprints202403.1815.v1), 2024-03-29
Supplement: Supplementary file 7 [file Table S8.xlsx]

## Sheet: 2可视化表格
Supplemental table S8. Top 30 hub genes in the blue module
gene id	gene name	Connectivity	module
MsG0080048780.01	MsG0080048780.01	627.629	blue
MsG0180003617.01	MsG0180003617.01	665.23	blue
MsG0180005660.01	MsG0180005660.01	647.5	blue
MsG0280006534.01	MsG0280006534.01	634.98	blue
MsG0280009384.01	MsG0280009384.01	647.901	blue
MsG0280010485.01	MsG0280010485.01	634.341	blue
MsG0280010854.01	MsG0280010854.01	625.224	blue
MsG0280011273.01	MsG0280011273.01	628.768	blue
MsG0380014798.01	MsG0380014798.01	633.749	blue
MsG0380017141.01	MsG0380017141.01	631.242	blue
MsG0380017474.01	MsG0380017474.01	642.489	blue
MsG0380017651.01	MsG0380017651.01	642.976	blue
MsG0380018066.01	MsG0380018066.01	622.93	blue
MsG0480018324.01	MsG0480018324.01	664.087	blue
MsG0480019838.01	MsG0480019838.01	616.181	blue
MsG0480021169.01	MsG0480021169.01	640.782	blue
MsG0480021777.01	MsG0480021777.01	659.354	blue
MsG0480021682.01	MsG0480021682.01	655.352	blue
MsG0480021803.01	MsG0480021803.01	618.882	blue
MsG0480022260.01	MsG0480022260.01	621.259	blue
MsG0480022826.01	MsG0480022826.01	638.725	blue
MsG0480023802.01	MsG0480023802.01	628.173	blue
MsG0580025773.01	MsG0580025773.01	623.748	blue
MsG0580028853.01	MsG0580028853.01	623.123	blue
MsG0780040281.01	MsG0780040281.01	627.384	blue
MsG0780040685.01	MsG0780040685.01	649.795	blue
MsG0780041120.01	MsG0780041120.01	633.685	blue
MsG0780041331.01	MsG0780041331.01	616.386	blue
MsG0880043762.01	MsG0880043762.01	654.807	blue
MsG0880045283.01	MsG0880045283.01	657.58	blue
